# Supplementary material for: Thor: a platform for cell-level investigation of spatial transcriptomics and histology
Source: Research Square preprint supplement (doi:10.21203/rs.3.rs-4909620/v1), 2025-03-10
Supplement: Supplementary file 1 [file d270a2afef8cb766c4cf4d80.xlsx]

## Sheet: TableS1.MOB gene signatures
Gene	Neuron subtypes
1700016K19Rik	OSN
Gm13589	OSN
Gm6878	OSN
Dynlrb2	OSN
Smim22	OSN
Tmem74bos	OSN
Efcab10	OSN
Gm16196	OSN
Tstd1	OSN
1700097N02Rik	OSN
Fam81b	OSN
1700012B09Rik	OSN
Pth2	OSN
Uckl1os	OSN
Olfr309	OSN
Pifo	OSN
BC049352	OSN
Acbd7	OSN
Hdc	OSN
Nrn1l	OSN
Meig1	OSN
Omp	OSN
Stoml3	OSN
Chtf18	OSN
Defb25	OSN
1110017D15Rik	OSN
Smkr-ps	OSN
Rsph1	OSN
Dnajb13	OSN
Krt72	OSN
Riiad1	OSN
5730403I07Rik	OSN
Gm20465	OSN
Nme5	OSN
Olfr1297	OSN
Cfap58	OSN
Gm16124	OSN
Hist2h2be	OSN
H2-DMb2	OSN
Morn5	OSN
Spa17	OSN
Gm15417	OSN
Atf5	OSN
Adam28	OSN
Gm32950	OSN
Fam178b	OSN
RP24-173O20.2	OSN
F8	OSN
S100a2	OSN
Olfr1229	OSN
1700064M15Rik	OSN
Dmkn	OSN
Gng8	OSN
1700001L19Rik	OSN
Stom	OSN
Rd3	OSN
Fam213b	OSN
Gm38165	OSN
S100g	OSN
Cfap100	OSN
Gm10941	OSN
Gm15747	OSN
4930515B02Rik	OSN
Trak2	OSN
Gm28727	OSN
Jakmip1	OSN
RP24-492L15.6	OSN
Fam131c	OSN
Cdnf	OSN
Pdlim1	OSN
Lrguk	OSN
Olfr1420	OSN
Olfr1288	OSN
Cox7a1	OSN
2310040G24Rik	OSN
Olfr727	OSN
Rp2	OSN
Casc1	OSN
Gm4076	OSN
Rsph14	OSN
Cfap206	OSN
Mycbp	OSN
Ppfia1	OSN
BB365896	OSN
1700088E04Rik	OSN
Gng13	OSN
Macrod1	OSN
Scrib	OSN
Gm20594	OSN
1700040L02Rik	OSN
Mcf2l	OSN
Saxo2	OSN
Enkur	OSN
Kntc1	OSN
Gnal	OSN
Olfr1295	OSN
Tom1	OSN
Gm5239	OSN
Tshz2	OSN
9530034E10Rik	OSN
1700007L15Rik	OSN
S100a5	OSN
Gm10126	OSN
Tbc1d9b	OSN
Sult1d1	OSN
1700016D06Rik	OSN
Plekhm2	OSN
Plekhb1	OSN
Trim45	OSN
Otud3	OSN
Gm15441	OSN
Gm15860	OSN
Ppef1	OSN
Gm12996	OSN
Ctxn3	OSN
Gm13572	OSN
D730003I15Rik	OSN
Tsnaxip1	OSN
Atox1	OSN
Olfr287	OSN
Cfap77	OSN
Crym	OSN
Tesc	OSN
Fate1	OSN
Kif5b	OSN
Zfos1	OSN
Gm7808	OSN
Gm10073	OSN
Eci3	OSN
Gm10076	OSN
Rab25	OSN
Ift43	OSN
Mgmt	OSN
Gm16099	OSN
Fam217a	OSN
Doc2g	OSN
mt-Atp8	OSN
Med9os	OSN
Rps12-ps3	OSN
Gm11808	OSN
Cartpt	OSN
Tpt1	OSN
Gm16984	OSN
S100a4	OSN
Ucp2	OSN
Mt2	OSN
Rab26os	OSN
Ttc9	OSN
Ppp1r14b	OSN
Anapc13	OSN
Morn2	OSN
Olfr1301	OSN
Pfdn2	OSN
mt-Nd5	OSN
Gm9843	OSN
S100a13	OSN
mt-Nd4l	OSN
Toporsos	OSN
Adipor1	OSN
Cib1	OSN
mt-Nd6	OSN
Aldh1a1	OSN
Ybey	OSN
Rpl13a-ps1	OSN
Rps12	OSN
Sytl1	OSN
Paqr8	OSN
Gfap	OSN
5430402O13Rik	OSN
Ndufv3	OSN
Yap1	OSN
4732414G09Rik	OSN
Gm10138	OSN
Uba52	OSN
Trnp1	OSN
Rpl30	OSN
Rpl23a-ps3	OSN
Mreg	OSN
Gm13830	OSN
A330048O09Rik	OSN
Svip	OSN
Rpl21-ps4	OSN
Rpl39	OSN
Wdr89	OSN
2900052N01Rik	OSN
Impdh1	OSN
Cfap126	OSN
Gm10263	OSN
2010107E04Rik	OSN
Ndufa1	OSN
Gm11837	OSN
Zfp365	OSN
Rplp1	OSN
1700023F06Rik	OSN
Taco1os	OSN
Fau	OSN
Gm10250	OSN
Dpcd	OSN
Pfdn5	OSN
Rps24	OSN
Grem1	PGC
Oprk1	PGC
Adora2a	PGC
Zfp385c	PGC
Nppa	PGC
Kctd8	PGC
Gpr22	PGC
Gm11549	PGC
Tle6	PGC
Opn3	PGC
Apold1	PGC
Scn5a	PGC
Pde5a	PGC
Cnr1	PGC
Chml	PGC
Tac2	PGC
AI593442	PGC
Egf	PGC
Pdzrn4	PGC
Pld5	PGC
Lingo3	PGC
Rgs7	PGC
Crispld2	PGC
Adora2b	PGC
Prkcq	PGC
Lamb3	PGC
RP24-402O2.2	PGC
Sdc1	PGC
Gpr139	PGC
Igfbp3	PGC
Pygm	PGC
Gm13054	PGC
Pde1c	PGC
Kcnj12	PGC
4933405D12Rik	PGC
Fam163a	PGC
6330410L21Rik	PGC
Npffr1	PGC
Nxph1	PGC
Insm1	PGC
Vip	PGC
Vipr1	PGC
Fmn1	PGC
Spns3	PGC
AI839979	PGC
Gm26829	PGC
Tle2	PGC
Spon1	PGC
B3galt2	PGC
Prss23	PGC
Necab1	PGC
Zic2	PGC
Zic5	PGC
Rgs10	PGC
A930003A15Rik	PGC
Cyth1	PGC
Tmem108	PGC
Kcnip2	PGC
Sipa1l2	PGC
Gdf6	PGC
Fgf14	PGC
Inpp4b	PGC
Prr16	PGC
Abhd11os	PGC
Gpr176	PGC
Grm2	PGC
Plvap	PGC
Gem	PGC
Arsi	PGC
Glod5	PGC
Pde2a	PGC
Htr1f	PGC
Kank2	PGC
G0s2	PGC
Asic1	PGC
Zfp804b	PGC
Phf24	PGC
Cdh6	PGC
Syt17	PGC
Enho	PGC
Bmp1	PGC
Tmem176b	PGC
Rec8	PGC
A830019P07Rik	PGC
Mgll	PGC
Sesn2	PGC
Ccbe1	PGC
Fam150b	PGC
Usp51	PGC
Fgd3	PGC
Sel1l3	PGC
Ccdc109b	PGC
Fam19a2	PGC
Fh1	PGC
D030068K23Rik	PGC
Vstm2l	PGC
Aqp2	PGC
Angptl2	PGC
Fam124a	PGC
Fam49a	PGC
Gm28111	PGC
Sapcd1	PGC
Asic4	PGC
Cpox	PGC
Tcap	PGC
Pcsk6	PGC
Nrsn1	PGC
Sulf2	PGC
Pvrl3	PGC
Tmtc4	PGC
Hsd17b11	PGC
Zic1	PGC
Pard6g	PGC
Whrn	PGC
Gadd45a	PGC
Pax6os1	PGC
Ret	PGC
Cdca7l	PGC
Zfp385a	PGC
Kctd12b	PGC
Smim20.1	PGC
Cdkn1b	PGC
Hdac11	PGC
Cygb	PGC
Etv5	PGC
Thsd4	PGC
2600006K01Rik	PGC
Calb2	PGC
Diras2	PGC
Ccdc184	PGC
Gca	PGC
Pag1	PGC
Pik3r3	PGC
Cd70	PGC
Kcnd3os	PGC
Gm32200	PGC
Cacnb2	PGC
Pccb	PGC
Gm29431	PGC
Bglap2	PGC
Ttc28	PGC
Kirrel3	PGC
Klhl8	PGC
Lzts2	PGC
Slc1a3	PGC
Mrps6	PGC
Kiss1r	PGC
4833422C13Rik	PGC
Dll3	PGC
Exoc3l	PGC
Herc3	PGC
Bmp7	PGC
Slitrk2	PGC
Gm7334	PGC
Tspan15	PGC
Fcgrt	PGC
Smyd4	PGC
Nbl1	PGC
Coro2b	PGC
Rom1	PGC
Igsf21	PGC
Msi2	PGC
Nos1	PGC
Reps2	PGC
Rgs3	PGC
Cd164l2	PGC
Cacna2d2	PGC
Pcdh11x	PGC
Fam46a	PGC
Sipa1	PGC
Chrna1os	PGC
Aifm2	PGC
Ccnd3	PGC
Cdh12	PGC
Flywch2	PGC
Zswim7	PGC
Dnajc12	PGC
1700066B19Rik	PGC
Nap1l5	PGC
Tmem169	PGC
Prtg	PGC
Car4	PGC
Me1	PGC
Rgs9bp	PGC
Cerk	PGC
Tcf7	PGC
4930451G09Rik	PGC
Pnma3	PGC
Sat2	PGC
Lgals1	PGC
Pkp4	PGC
Cecr2	PGC
Itgae	PGC
Ccdc89	PGC
C030037D09Rik	PGC
Obsl1	PGC
Dusp16	PGC
Mycbpap	PGC
Plekhb2	PGC
Il18	PGC
Islr2	Immature
Sox11	Immature
Vcan	Immature
Dpysl3	Immature
St8sia2	Immature
Mex3a	Immature
Cd1d1	Immature
Traf4	Immature
Gm9844	Immature
Carhsp1	Immature
Zfp57	Immature
Cd24a	Immature
Mex3b	Immature
Zfp704	Immature
Zfp41	Immature
Mycn	Immature
Mycl	Immature
Abracl	Immature
Nrep	Immature
Hn1	Immature
Prokr2	Immature
Slain1	Immature
Dusp4	Immature
Igfbpl1	Immature
Tmem123	Immature
Lmnb1	Immature
Gm14964	Immature
Trim59	Immature
Tubb2b	Immature
Stmn2	Immature
Dynlt1a	Immature
Mir17hg	Immature
Klf7	Immature
Dpysl5	Immature
Prkd3	Immature
Myl2	Immature
3010003L21Rik	Immature
Gng2	Immature
Fam210b	Immature
Bzw2	Immature
Serf1	Immature
Tex29	Immature
Sap30	Immature
Zbtb12	Immature
2810408A11Rik	Immature
Zfp618	Immature
Casp3	Immature
Frat2	Immature
Mex3d	Immature
Scrt2	Immature
Sncaip	Immature
Mn1	Immature
Nnat	Immature
Cacng4	Immature
Gm26735	Immature
Txnrd1	Immature
Nhsl1	Immature
Gm17750	Immature
Arl4d	Immature
Atat1	Immature
Fam110a	Immature
Mfap2	Immature
Eif4ebp2	Immature
Trib2	Immature
Ccnd2	Immature
Elovl2	Immature
Rcor2	Immature
Cdk4	Immature
B3gnt5	Immature
Asxl3	Immature
Gm4889	Immature
Fbln1	Immature
Cald1	Immature
2210008F06Rik	Immature
Arx	Immature
Cdc42ep3	Immature
Syne2	Immature
Idh1	Immature
D930028M14Rik	Immature
Med22	Immature
D930015E06Rik	Immature
Hmgb3	Immature
Enox1	Immature
Efna4	Immature
45541	Immature
Sh3bp2	Immature
Dbndd1	Immature
Map2k6	Immature
Nfib	Immature
Gm3764	Immature
Hmgn2	Immature
Dynlt1f	Immature
Ezh2	Immature
Hes6	Immature
Sdk2	Immature
Hnrnpab	Immature
Amotl2	Immature
Mad2l2	Immature
Smarcc1	Immature
Gm8730	Immature
Cldn34c1	Immature
Sox4	Immature
Hdac2	Immature
Tubb5	Immature
Rnf144a	Immature
H2afy2	Immature
Samd14	Immature
Mpped2	Immature
Igsf9	Immature
Zfp90	Immature
Hnrnpa1	Immature
Ypel1	Immature
Prr36	Immature
Ddah2	Immature
Sh3d19	Immature
Vash2	Immature
Fabp5	Immature
Flrt2	Immature
Cdca7	Immature
Ephb2	Immature
Dlx2	Immature
Rnasel	Immature
Kif26a	Immature
Zc3hav1l	Immature
Zfp184	Immature
Polr3k	Immature
Mtss1	Immature
Pycr1	Immature
Trim67	Immature
Nav3	Immature
Dbn1	Immature
D430041D05Rik	Immature
Nedd1	Immature
Map4k4	Immature
Ick	Immature
Csrp2	Immature
Zfp558	Immature
Tmeff1	Immature
Nipsnap3b	Immature
Btg1	Immature
Frmd4b	Immature
Myt1	Immature
Tmem2	Immature
Rassf2	Immature
Midn	Immature
H2-M5	Immature
Amer1	Immature
Pappa	Immature
Ahsa2	Immature
Ubald2	Immature
Smarce1	Immature
Zscan2	Immature
Zak	Immature
Tubb3	Immature
Bcl9	Immature
Srgap2	Immature
Chd7	Immature
Aldh18a1	Immature
Stmn1	Immature
Vta1	Immature
Pantr1	Immature
Rnf165	Immature
Ubtd2	Immature
Map1b	Immature
Armc10	Immature
Tmsb10	Immature
Ube2i	Immature
Rhno1	Immature
Sbk1	Immature
Satb1	Immature
Vav2	Immature
Gm8186	Immature
Nudt4	Immature
Apc2	Immature
Bach2	Immature
Erbb4	Immature
Trp53	Immature
Elavl2	Immature
Gm11266	Immature
Mapk7	Immature
Kdm2b	Immature
Cklf	Immature
Zfp422	Immature
Svbp	Immature
Dctpp1	Immature
Gm10282	Immature
45352	Immature
Nasp	Immature
Tmem132e	Immature
Ube2d1	Immature
Pcbp4	Immature
Lix1l	Immature
45354	Immature
Krt1	Immature
Marcksl1	Immature
Trim13	Immature
Afap1	Immature
Rnf182	Immature
Pou3f2	Immature
Ninl	Immature
Gm15594	Transition
Bbof1	Transition
Ftx	Transition
Trank1	Transition
Zmym1	Transition
Slc38a6	Transition
Ascc2	Transition
Bzrap1	Transition
Paxbp1	Transition
Ddx26b	Transition
Fam193b	Transition
Slc17a9	Transition
B230307C23Rik	Transition
Runx2	Transition
R3hdm1	Transition
Dot1l	Transition
Cttnbp2	Transition
Chuk	Transition
Ppip5k1	Transition
Zfc3h1	Transition
Dvl1	Transition
Tet2	Transition
Gm26518	Transition
Wtip	Transition
Safb2	Transition
Pde6a	Transition
Iqce	Transition
Nsmaf	Transition
Gm16105	Transition
Ccdc39	Transition
Pola1	Transition
Cd2ap	Transition
Gm26836	Transition
Erdr1	Transition
Sclt1	Transition
AI314180	Transition
Myo9b	Transition
Csmd3	Transition
Osbpl3	Transition
Uggt2	Transition
Lrrc16a	Transition
Dennd1b	Transition
Eml5	Transition
Zcchc7	Transition
Gm14703	Transition
Ahi1	Transition
Wdr60	Transition
Itsn2	Transition
P2ry14	Transition
Mical3	Transition
Nvl	Transition
Slf1	Transition
Npas4	Transition
Csmd1	Transition
Psme4	Transition
Tyk2	Transition
4430402I18Rik	Transition
Nav2	Transition
Mapk1ip1	Transition
Pkd1	Transition
Crebzf	Transition
Ppp1r12c	Transition
Abcc1	Transition
Dcdc2b	Transition
RP24-267C3.3	Transition
Polg	Transition
Tsix	Transition
Kcnt1	Transition
Diaph2	Transition
Slco5a1	Transition
Atp9b	Transition
Epha10	Transition
Srrm3	Transition
Ddx17	Transition
Gpt	Transition
Phldb1	Transition
Dock3	Transition
Col7a1	Transition
Vps13c	Transition
PISD	Transition
Inha	Transition
Ccnt2	Transition
Plch2	Transition
Dync2h1	Transition
Zc3h7a	Transition
Col4a1	Transition
Usp48	Transition
Bend7	Transition
Unc13a	Transition
Dennd6b	Transition
Rimbp2	Transition
Nfat5	Transition
Pitpnm3	Transition
Rasa2	Transition
Phf20l1	Transition
4933427D14Rik	Transition
Otud4	Transition
Unc80	Transition
Gm15856	Transition
Smg1	Transition
Zfp384	Transition
Rbm26	Transition
Fam184a	Transition
Nktr	Transition
Clk1	Transition
Cpsf4	Transition
Hars2	Transition
Kalrn	Transition
Lrrc45	Transition
Trio	Transition
Snrnp70	Transition
Sptbn4	Transition
Ankef1	Transition
2410089E03Rik	Transition
Lncpint	Transition
Leng8	Transition
Zfp512b	Transition
Ranbp10	Transition
Arhgef6	Transition
Gm16586	Transition
Usp53	Transition
Mtx3	Transition
Gls	Transition
Wdr90	Transition
Ubp1	Transition
Srrm4	Transition
Matk	Transition
Tmem191c	Transition
Gm21781	Transition
Flnb	Transition
Rnpc3	Transition
Snhg11	Transition
Dzip1l	Transition
Gm16141	Transition
Grik2	Transition
Ralgapa1	Transition
Timp4	Transition
Agl	Transition
Ascc3	Transition
Luc7l2	Transition
Amy1	Transition
Lrrcc1	Transition
Otud7b	Transition
Kcnq1ot1	Transition
Luc7l3	Transition
Crtc2	Transition
Inpp5j	Transition
Il1rapl1	Transition
Pan2	Transition
Gm28151	Transition
Ankzf1	Transition
Dcp1b	Transition
Taf1d	Transition
Ccdc62	Transition
Tmem243	Transition
1700024B18Rik	Transition
Atg16l1	Transition
Plekha5	Transition
Slc25a19	Transition
Ttc14	Transition
Uvrag	Transition
Gm26652	Transition
Mdm1	Transition
Mdn1	Transition
Ncbp3	Transition
Galc	Transition
Gm26724	Transition
Mbd6	Transition
Cspp1	Transition
Btaf1	Transition
Zfp598	Transition
Vps13a	Transition
Ice1	Transition
Ddhd1	Transition
Zkscan2	Transition
Speg	Transition
Arpp21	Transition
Farp1	Transition
Cnga1	Transition
E430024P14Rik	Transition
Stxbp5l	Transition
Atp8b2	Transition
Ddhd2	Transition
Far1	Transition
Rfx1	Transition
Gm996	Transition
Zfp950	Transition
6430573F11Rik	Transition
Mettl17	Transition
Ago3	Transition
Numb	Transition
Cd27	Transition
Akap8l	Transition
Pfkp	Transition
Fus	Transition
Pwwp2a	Transition
Atxn2l	Transition
Kcnq2	Transition
Akap8	Transition
Utp20	Transition
Ano3	GC-1
Vipr2	GC-1
Kcnj4	GC-1
Tyro3	GC-1
Cntnap4	GC-1
Kcnh1	GC-1
Icam5	GC-1
Pde6a	GC-1
Clec1a	GC-1
4430402I18Rik	GC-1
Kcnq5	GC-1
Gria3	GC-1
Atp1a1	GC-1
Penk	GC-1
Moxd1	GC-1
Kcnk12	GC-1
Atp2b2	GC-1
Slc35d3	GC-1
Gprc5b	GC-1
Uxs1	GC-1
Kcnv1	GC-1
Tenm3	GC-1
Epha4	GC-1
Gm15856	GC-1
Chrm1	GC-1
Grin2b	GC-1
Cyp46a1	GC-1
Nt5e	GC-1
Chrna10	GC-1
Ryr2	GC-1
Grin1	GC-1
Tspan33	GC-1
Slc1a1	GC-1
6430571L13Rik	GC-1
C1qtnf4	GC-1
Epha5	GC-1
Grin2a	GC-1
4930469G21Rik	GC-1
Adcy2	GC-1
Grm5	GC-1
Flrt3	GC-1
Morc2b	GC-1
Slc8a1	GC-1
Gcnt1	GC-1
Ankef1	GC-1
Plppr4	GC-1
Ptpro	GC-1
Cx3cl1	GC-1
Lgr6	GC-1
Cds1	GC-1
Cacna1d	GC-1
Cpa6	GC-1
Igf2r	GC-1
Eml5	GC-1
Kcnh3	GC-1
Shisa8	GC-1
Trhde	GC-1
Lgi1	GC-1
Gm16141	GC-1
Arxes1	GC-1
Gabrd	GC-1
Nptn	GC-1
Slc9a1	GC-1
Nrcam	GC-1
Csgalnact1	GC-1
Cacna1h	GC-1
Tctn3	GC-1
Cacna1c	GC-1
Panx1	GC-1
Cacna2d1	GC-1
Slc9a9	GC-1
Gdpd5	GC-1
Cyb561d1	GC-1
A830039N20Rik	GC-1
Galnt18	GC-1
Adgrb2	GC-1
Il1rapl1	GC-1
Car11	GC-1
9530059O14Rik	GC-1
Serpini1	GC-1
Bzrap1	GC-1
Gm15537	GC-1
Cdh22	GC-1
C2cd2l	GC-1
Sema3c	GC-1
Sun1	GC-1
Ptprn	GC-1
Prkca	GC-1
Shisa4	GC-1
Cacna1e	GC-1
Lrtm2	GC-1
Sstr3	GC-1
Kank3	GC-1
Kcnb2	GC-1
Qsox2	GC-1
Adra1a	GC-1
Atp1a3	GC-1
Gm26518	GC-1
Hs6st2	GC-1
Ggt7	GC-1
Kcnh7	GC-1
Dgat2l6	GC-1
RP24-267C3.3	GC-1
Caly	GC-1
A830036E02Rik	GC-1
Flrt1	GC-1
RP23-446E13.1	GC-1
Kcnj6	GC-1
P4ha1	GC-1
Tor3a	GC-1
Cacng3	GC-1
Cspg5	GC-1
Scn3b	GC-1
Gde1	GC-1
Kcnb1	GC-1
Them6	GC-1
Adgrb1	GC-1
Slc4a10	GC-1
Txndc11	GC-1
Gm14703	GC-1
Ildr2	GC-1
Shisa7	GC-1
Atp2b1	GC-1
Aste1	GC-1
Fgf16	GC-1
Lrrtm3	GC-1
Slc30a1	GC-1
Kcna4	GC-1
Tmem158	GC-1
Gm16105	GC-1
Itfg1	GC-1
Grik2	GC-1
Itgav	GC-1
Sv2c	GC-1
Gpr155	GC-1
Arsb	GC-1
Lamp5	GC-1
Tm6sf1	GC-1
Slc2a3	GC-1
Trpc4	GC-1
Kcnh5	GC-1
Tmeff2	GC-1
Slc32a1	GC-1
Mctp1	GC-1
Galnt16	GC-1
Tmtc1	GC-1
Amigo1	GC-1
Epha10	GC-1
Itm2c	GC-1
Adgrl3	GC-1
Mmgt2	GC-1
Tctn1	GC-1
Kcnk1	GC-1
Trank1	GC-1
Adgrl1	GC-1
Emc4	GC-1
Sort1	GC-1
Lrrtm4	GC-1
St6galnac3	GC-1
Igsf3	GC-1
Slc22a17	GC-1
Adamts20	GC-1
B230307C23Rik	GC-1
Fam234b	GC-1
Nme7	GC-1
Atp2c1	GC-1
Dnajb11	GC-1
Fam20c	GC-1
Plppr5	GC-1
Dcbld2	GC-1
Tmem131	GC-1
Grm4	GC-1
Syt10	GC-1
Slc8a3	GC-1
Lclat1	GC-1
Cnnm2	GC-1
Sez6	GC-1
P4htm	GC-1
Inpp5j	GC-1
Aplp1	GC-1
Fkbp2	GC-1
Tfrc	GC-1
Lmbrd2	GC-1
Dhrs7b	GC-1
Phldb1	GC-1
Syt1	GC-1
Gria2	GC-1
Lrfn4	GC-1
Acsl3	GC-1
Slitrk1	GC-1
Scn3a	GC-1
Vimp	GC-1
Tmem243	GC-1
Tmbim4	GC-1
Stap1	GC-1
Gm10419	GC-1
Itm2b	GC-1
Soat1	GC-1
Cdh10	GC-1
Tex264	GC-1
Klf16	GC-2
Snx7	GC-2
Cdkn1a	GC-2
Gm28578	GC-2
Pakap	GC-2
Gm13031	GC-2
Gm29593	GC-2
Tuba8	GC-2
Nab2	GC-2
A330009N23Rik	GC-2
Ptk2b	GC-2
Rab40b	GC-2
Scgn	GC-2
Map2k1	GC-2
Egln3	GC-2
Hspa2	GC-2
Isoc1	GC-2
Dusp5	GC-2
Icam4	GC-2
Igfbp6	GC-2
Dusp14	GC-2
Ankrd63	GC-2
Sp7	GC-2
Ripply2	GC-2
Gpsm1	GC-2
Rhcg	GC-2
Lmntd1	GC-2
Cpne6	GC-2
Wipf3	GC-2
Myo16	GC-2
Fam131b	GC-2
Mpp2	GC-2
Amigo2	GC-2
Grb2	GC-2
Limd2	GC-2
Cdh15	GC-2
Rgs12	GC-2
Stxbp6	GC-2
Tnfrsf13c	GC-2
Kctd4	GC-2
Egr4	GC-2
Grasp	GC-2
Arhgap15	GC-2
Arg2	GC-2
Rbfox3	GC-2
Synpo	GC-2
Fam43b	GC-2
Arl4a	GC-2
Rragd	GC-2
Syn1	GC-2
Clip4	GC-2
Dmtn	GC-2
Stk32c	GC-2
Necab3	GC-2
Ddn	GC-2
2610301B20Rik	GC-2
Rap1gds1	GC-2
Rprml	GC-2
Lzts1	GC-2
Dgkb	GC-2
Samd12	GC-2
Nrip2	GC-2
Bag5	GC-2
Pde1a	GC-2
Btbd19	GC-2
Gm15867	GC-2
Fgf12	GC-2
Arhgap27os2	GC-2
Dync1i1	GC-2
Slc9a3r2	GC-2
Glrx	GC-2
Pcp4l1	GC-2
Ubtd1	GC-2
Gng4	GC-2
Rpp25	GC-2
Tacr1	GC-2
Rin1	GC-2
Col6a1	GC-2
Ankrd34a	GC-2
Ipcef1	GC-2
2010300C02Rik	GC-2
Ldhal6b	GC-2
Avpi1	GC-2
Zar1	GC-2
Ap1s2	GC-2
Pacsin1	GC-2
Sybu	GC-2
Ypel5	GC-2
Mypop	GC-2
Ankrd33b	GC-2
Myo3b	GC-2
Otud1	GC-2
Mtfp1	GC-2
Ccsap	GC-2
Spata2l	GC-2
Artn	GC-2
Rasgrf2	GC-2
Necab2	GC-2
Fam81a	GC-2
Ablim1	GC-2
Spsb1	GC-2
Stard10	GC-2
Nrip3	GC-2
Atp6v1g2	GC-2
Cystm1	GC-2
Nrl	GC-2
Sult2b1	GC-2
Mast3	GC-2
Gm14137	GC-2
Ppp3cc	GC-2
Doc2a	GC-2
Gprin1	GC-2
Acvr1c	GC-2
Ube2ql1	GC-2
Car7	GC-2
Cdo1	GC-2
Ubald1	GC-2
Snca	GC-2
Hist2h3c2	GC-2
Hebp1	GC-2
Neto1	GC-2
Trmt61a	GC-2
Fam179a	GC-2
Gas7	GC-2
Rasgef1a	GC-2
Pip4k2a	GC-2
Hpcal4	GC-2
Prickle1	GC-2
Camkv	GC-2
Krt12	GC-2
D1Ertd622e	GC-2
Dazl	GC-2
2810455O05Rik	GC-2
Nupl1	GC-2
Gm1976	GC-2
Actr3b	GC-2
Desi1	GC-2
Prrt1	GC-2
Parp4	GC-2
Ell2	GC-2
Rap2a	GC-2
Tln2	GC-2
Lix1	GC-2
Ppm1e	GC-2
Gm28424	GC-2
Gnai1	GC-2
4932443I19Rik	GC-2
Fam207a	GC-2
Map6d1	GC-2
Phyhipl	GC-2
Llgl2	GC-2
Usp46	GC-2
Ggct	GC-2
Arhgef3	GC-2
Incenp	GC-2
Junb	GC-2
Rasl11b	GC-2
Lin7b	GC-2
Lin7a	GC-2
Nhsl2	GC-2
Phlda1	GC-2
Gfod1	GC-2
Baiap2	GC-2
Gm10083	GC-2
C77370	GC-2
Ctxn1	GC-2
Gm15510	GC-2
AB041806	GC-2
Aldoart1	GC-2
Btbd3	GC-2
Sh3bgrl2	GC-2
Ppp4r4	GC-2
Eepd1	GC-2
Fam206a	GC-2
Mok	GC-2
Dlgap3	GC-2
Gabra5	GC-2
Ncdn	GC-2
Gm43689	GC-2
Plekha2	GC-2
Camk2b	GC-2
Pacsin2	GC-2
Rasl10a	GC-2
Jsrp1	GC-2
Stx1a	GC-2
Ablim3	GC-2
Kcna1	GC-2
Cap2	GC-2
Anks1b	GC-2
Pde1b	GC-2
Tiam1	GC-2
Acta1	GC-2
Rbfox1	GC-2
Garem	GC-2
Lrrc73	GC-2
Seh1l	GC-2
Ociad2	GC-2
Camk2n1	GC-2
Syn2	GC-2
Ston2	GC-2
Aldoc	AstrocyteLike
S100b	AstrocyteLike
S100a1	AstrocyteLike
Mobp	AstrocyteLike
Lxn	AstrocyteLike
Gsta4	AstrocyteLike
Bcas1	AstrocyteLike
Acsbg1	AstrocyteLike
Gfap	AstrocyteLike
Tst	AstrocyteLike
Dbi	AstrocyteLike
Zcchc24	AstrocyteLike
Glul	AstrocyteLike
Gstm1	AstrocyteLike
Lmo1	AstrocyteLike
Mbp	AstrocyteLike
2900052N01Rik	AstrocyteLike
Fabp7	AstrocyteLike
Cryab	AstrocyteLike
Pon2	AstrocyteLike
Fam107a	AstrocyteLike
S100a13	AstrocyteLike
A330048O09Rik	AstrocyteLike
Ndrg2	AstrocyteLike
Doc2g	AstrocyteLike
mt-Nd6	AstrocyteLike
Hrsp12	AstrocyteLike
Mt2	AstrocyteLike
Paqr8	AstrocyteLike
Mt3	AstrocyteLike
Fbxo2	AstrocyteLike
S100a5	AstrocyteLike
Mt1	AstrocyteLike
Pdzph1	AstrocyteLike
Plekhb1	AstrocyteLike
Tmem229a	AstrocyteLike
mt-Nd5	AstrocyteLike
Kcnj10	AstrocyteLike
Suclg2	AstrocyteLike
Rgcc	AstrocyteLike
Pla2g16	AstrocyteLike
Dbx2	AstrocyteLike
Gng13	AstrocyteLike
Ptgds	AstrocyteLike
Slc1a2	AstrocyteLike
Atp1a2	AstrocyteLike
Slc25a18	AstrocyteLike
Olig1	AstrocyteLike
Apoe	AstrocyteLike
mt-Nd4l	AstrocyteLike
Prdx6	AstrocyteLike
Sparc	AstrocyteLike
Gng5	AstrocyteLike
Acadl	AstrocyteLike
Gatm	AstrocyteLike
Sepp1	AstrocyteLike
BC026585	AstrocyteLike
Fth1	AstrocyteLike
mt-Nd3	AstrocyteLike
Asrgl1	AstrocyteLike
Cnot3	AstrocyteLike
Map1a	AstrocyteLike
Rbp1	AstrocyteLike
Plp1	AstrocyteLike
Metrn	AstrocyteLike
mt-Atp8	AstrocyteLike
S100a6	AstrocyteLike
Id3	AstrocyteLike
Tsc22d4	AstrocyteLike
mt-Nd2	AstrocyteLike
Mog	AstrocyteLike
Apod	AstrocyteLike
mt-Atp6	AstrocyteLike
Pcp4	AstrocyteLike
Ephx2	AstrocyteLike
Cst3	AstrocyteLike
Anxa5	AstrocyteLike
Scd1	AstrocyteLike
Aldh2	AstrocyteLike
Sfxn5	AstrocyteLike
Ptn	AstrocyteLike
Rplp1	AstrocyteLike
Rasl10b	AstrocyteLike
Slc6a11	AstrocyteLike
mt-Nd4	AstrocyteLike
mt-Co1	AstrocyteLike
mt-Co2	AstrocyteLike
Gm26881	AstrocyteLike
Snhg18	AstrocyteLike
Cox8a	AstrocyteLike
Prdx1	AstrocyteLike
Rps29	AstrocyteLike
Aldh1l1	AstrocyteLike
mt-Cytb	AstrocyteLike
Rpl41	AstrocyteLike
Fxyd1	AstrocyteLike
Hes5	AstrocyteLike
mt-Nd1	AstrocyteLike
Gm29508	AstrocyteLike
Npy	AstrocyteLike
Gm20594	AstrocyteLike
Cox6a1	AstrocyteLike
mt-Co3	AstrocyteLike
S100a16	AstrocyteLike
Mlc1	AstrocyteLike
Ifi27l2a	AstrocyteLike
Pdlim2	AstrocyteLike
Ddt	AstrocyteLike
Gm42418	AstrocyteLike
Crip1	AstrocyteLike
Hist1h2bc	AstrocyteLike
Papss2	AstrocyteLike
Rps24	AstrocyteLike
Car2	AstrocyteLike
Phgdh	AstrocyteLike
Rpl37	AstrocyteLike
Pygb	AstrocyteLike
Tmsb4x	AstrocyteLike
Rps21	AstrocyteLike
Rpl38	AstrocyteLike
Acaa2	AstrocyteLike
Cnp	AstrocyteLike
Rpl37a	AstrocyteLike
Mmd2	AstrocyteLike
Cox6c	AstrocyteLike
Rps23	AstrocyteLike
Rps28	AstrocyteLike
Cox7c	AstrocyteLike
Ntsr2	AstrocyteLike
Il33	AstrocyteLike
Dhrs4	AstrocyteLike
Rhoc	AstrocyteLike
Rpl39	AstrocyteLike
Qdpr	AstrocyteLike
Rpl13a	AstrocyteLike
Uqcr11	AstrocyteLike
Rpl26	AstrocyteLike
Pla2g7	AstrocyteLike
Gm10073	AstrocyteLike
Sdc4	AstrocyteLike
Fau	AstrocyteLike
Ifitm3	AstrocyteLike
Plpp3	AstrocyteLike
Rplp2	AstrocyteLike
Cox4i1	AstrocyteLike
Apoc1	AstrocyteLike
Rpl13	AstrocyteLike
Rps14	AstrocyteLike
Ndufb9	AstrocyteLike
Uqcc2	AstrocyteLike
Cox5b	AstrocyteLike
Rps15	AstrocyteLike
Atp5k	AstrocyteLike
Rpl32	AstrocyteLike
Atp5e	AstrocyteLike
Glud1	AstrocyteLike
Rps19	AstrocyteLike
Uqcrq	AstrocyteLike
Rps12	AstrocyteLike
Renbp	AstrocyteLike
Rps25	AstrocyteLike
Rpl23a	AstrocyteLike
Rpl35a	AstrocyteLike
Rps27	AstrocyteLike
Aldh1a1	AstrocyteLike
Rps20	AstrocyteLike
Atp5j2	AstrocyteLike
Rpl14	AstrocyteLike
Gstm5	AstrocyteLike
Olfr1301	AstrocyteLike
Cox6b1	AstrocyteLike
Gpr37l1	AstrocyteLike
Hsdl2	AstrocyteLike
Rpl18a	AstrocyteLike
Tpt1	AstrocyteLike
Gldc	AstrocyteLike
Ckb	AstrocyteLike
Bfsp2	AstrocyteLike
Hadh	AstrocyteLike
Rps27a	AstrocyteLike
Kctd12	AstrocyteLike
Abhd4	AstrocyteLike
Rpl31	AstrocyteLike
Fgf1	AstrocyteLike
Acads	AstrocyteLike
Pfdn5	AstrocyteLike
Rpl36	AstrocyteLike
Ppp1r14a	AstrocyteLike
Rpl21	AstrocyteLike
Csrp1	AstrocyteLike
Rpl19	AstrocyteLike
Uqcrh	AstrocyteLike
Ndufa3	AstrocyteLike
Usmg5	AstrocyteLike
Vamp8	AstrocyteLike
Atp5l	AstrocyteLike
Rps8	AstrocyteLike
Rpl36a	AstrocyteLike
Rab31	AstrocyteLike
Sepw1	AstrocyteLike
Tmem132d	M/TC-1
Gm525	M/TC-1
Hhip	M/TC-1
Ly6g6e	M/TC-1
Nnmt	M/TC-1
Shisa6	M/TC-1
Neurod1	M/TC-1
Mrap2	M/TC-1
Klf5	M/TC-1
6430710C18Rik	M/TC-1
Neurod2	M/TC-1
Hapln3	M/TC-1
Trpc7	M/TC-1
Brca1	M/TC-1
Tpbgl	M/TC-1
Casp1	M/TC-1
Nxph4	M/TC-1
Pip5k1b	M/TC-1
Has1	M/TC-1
Trpc6	M/TC-1
Gm12027	M/TC-1
Clcf1	M/TC-1
Slc27a2	M/TC-1
Amhr2	M/TC-1
Bmpr1b	M/TC-1
Tmem132c	M/TC-1
Ctgf	M/TC-1
Stard5	M/TC-1
Nr6a1os	M/TC-1
Skap1	M/TC-1
F2r	M/TC-1
Fam150a	M/TC-1
Coch	M/TC-1
Slc17a6	M/TC-1
Creb3l3	M/TC-1
A830005F24Rik	M/TC-1
Thbs1	M/TC-1
Inadl	M/TC-1
Htr5b	M/TC-1
St8sia6	M/TC-1
Eomes	M/TC-1
Rad51ap2	M/TC-1
Rnf43	M/TC-1
Tmem266	M/TC-1
Kcnh6	M/TC-1
Smpdl3b	M/TC-1
Cdhr3	M/TC-1
Slc10a2	M/TC-1
Ano5	M/TC-1
Wnt5b	M/TC-1
D130043K22Rik	M/TC-1
Cdkl1	M/TC-1
Dhrs3	M/TC-1
Neurod6	M/TC-1
Gm42902	M/TC-1
Hapln1	M/TC-1
Gm44284	M/TC-1
Ptgis	M/TC-1
Slc22a4	M/TC-1
Bhlha9	M/TC-1
Gm30731	M/TC-1
Cnnm4	M/TC-1
Itga8	M/TC-1
Tfap2c	M/TC-1
Pigr	M/TC-1
Acaa1b	M/TC-1
Sh3rf3	M/TC-1
Ahrr	M/TC-1
Cdh4	M/TC-1
Best1	M/TC-1
Grem2	M/TC-1
Emx2	M/TC-1
Deptor	M/TC-1
Rasgef1b	M/TC-1
Rtl1	M/TC-1
Igfbp2	M/TC-1
Gm42848	M/TC-1
Zpbp	M/TC-1
Pmel	M/TC-1
Chst9	M/TC-1
1700034I23Rik	M/TC-1
Htr1d	M/TC-1
Ybx2	M/TC-1
Dsg2	M/TC-1
Grhl3	M/TC-1
Sult5a1	M/TC-1
F930015N05Rik	M/TC-1
2900072N19Rik	M/TC-1
Nrn1	M/TC-1
B3gnt4	M/TC-1
6330403A02Rik	M/TC-1
Vldlr	M/TC-1
Rab26	M/TC-1
Tmem125	M/TC-1
A730056A06Rik	M/TC-1
Pcdhgb1	M/TC-1
Rasa4	M/TC-1
Asprv1	M/TC-1
Csmd2	M/TC-1
Filip1	M/TC-1
Fkbp11	M/TC-1
Irf1	M/TC-1
Ets2	M/TC-1
Foxs1	M/TC-1
Rab32	M/TC-1
Igf1	M/TC-1
Shisa9	M/TC-1
Strip2	M/TC-1
Cby3	M/TC-1
Pdyn	M/TC-1
Astn2	M/TC-1
Ndp	M/TC-1
Armc3	M/TC-1
Nrg1	M/TC-1
Egfem1	M/TC-1
Lhfp	M/TC-1
Tmem97	M/TC-1
Gm43653	M/TC-1
Tmc6	M/TC-1
A830031A19Rik	M/TC-1
2810414N06Rik	M/TC-1
Ch25h	M/TC-1
9130008F23Rik	M/TC-1
Pdzd7	M/TC-1
Foxred2	M/TC-1
Cwh43	M/TC-1
Kcnip4	M/TC-1
Ephx4	M/TC-1
Cntn3	M/TC-1
Lrrc10b	M/TC-1
Xlr4a	M/TC-1
Shc3	M/TC-1
Gm42849	M/TC-1
Gm15169	M/TC-1
Rhbdl2	M/TC-1
Acvr2a	M/TC-1
Gpr157	M/TC-1
Ace	M/TC-1
Smim24	M/TC-1
Myh7b	M/TC-1
B430218F22Rik	M/TC-1
Dbhos	M/TC-1
Gm9754	M/TC-1
Sprtn	M/TC-1
Emx1	M/TC-1
Pgam2	M/TC-1
Ifit1bl2	M/TC-1
Tcf15	M/TC-1
Adrb1	M/TC-1
Cck	M/TC-1
Gm42669	M/TC-1
Fzd4	M/TC-1
Cgref1	M/TC-1
Trim66	M/TC-1
Tbc1d1	M/TC-1
Lsmem1	M/TC-1
Pard6b	M/TC-1
Xylt2	M/TC-1
Foxo1	M/TC-1
Fank1	M/TC-1
Txnrd3	M/TC-1
Epb41l4a	M/TC-1
Cpne2	M/TC-1
Arid5b	M/TC-1
Sema5b	M/TC-1
Clmp	M/TC-1
Zfp169	M/TC-1
Akap13	M/TC-1
Ifitm10	M/TC-1
Xkr8	M/TC-1
Gm10406	M/TC-1
Nmb	M/TC-1
Aloxe3	M/TC-1
Hpgd	M/TC-1
Lancl3	M/TC-1
Reep6	M/TC-1
Rhof	M/TC-1
Gm43118	M/TC-1
Bcar1	M/TC-1
Sap25	M/TC-1
Mgam	M/TC-1
A930011G23Rik	M/TC-1
Il4i1	M/TC-1
Cntn2	M/TC-1
AW495222	M/TC-1
Ptprt	M/TC-1
Gemin4	M/TC-1
Ahcy	M/TC-1
Adgrg2	M/TC-1
Gm26559	M/TC-1
Klf3	M/TC-1
Gm10545	M/TC-1
Tepp	M/TC-1
Fam65c	M/TC-1
Wnk4	M/TC-1
Grm1	M/TC-1
1700063D05Rik	M/TC-1
Cited1	M/TC-1
Bicc1	M/TC-1
Extl1	M/TC-1
Cdhr1	M/TC-2
Tmem163	M/TC-2
Sv2b	M/TC-2
Spp1	M/TC-2
Atp6ap1l	M/TC-2
Slc17a7	M/TC-2
Scube1	M/TC-2
Lrrtm1	M/TC-2
Crim1	M/TC-2
Chst15	M/TC-2
Slc41a3	M/TC-2
Reln	M/TC-2
Thsd7a	M/TC-2
Ms4a15	M/TC-2
3632451O06Rik	M/TC-2
Crh	M/TC-2
Sema3d	M/TC-2
Chst8	M/TC-2
Nmb	M/TC-2
Shisa3	M/TC-2
Galnt14	M/TC-2
Kcna2	M/TC-2
Sdc3	M/TC-2
Lingo1	M/TC-2
Rtn4rl1	M/TC-2
Lrrc55	M/TC-2
Dkkl1	M/TC-2
Slc6a7	M/TC-2
Wbscr17	M/TC-2
Ptchd2	M/TC-2
Rtn4r	M/TC-2
Sema3f	M/TC-2
Kitl	M/TC-2
Atrnl1	M/TC-2
Tspan9	M/TC-2
Adora1	M/TC-2
Hapln4	M/TC-2
Gla	M/TC-2
Nptx2	M/TC-2
Gpr12	M/TC-2
Cntn4	M/TC-2
Sema3a	M/TC-2
Ndnf	M/TC-2
Spock1	M/TC-2
Unc5d	M/TC-2
Slc20a1	M/TC-2
Nptx1	M/TC-2
Emb	M/TC-2
Cyp4x1	M/TC-2
Grm1	M/TC-2
Cbln1	M/TC-2
Gpnmb	M/TC-2
Nrn1	M/TC-2
L1cam	M/TC-2
Gabra1	M/TC-2
Dhcr24	M/TC-2
Xkr4	M/TC-2
Acan	M/TC-2
H2-M3	M/TC-2
Cd302	M/TC-2
Tgfa	M/TC-2
Slc22a23	M/TC-2
Otop2	M/TC-2
Plcxd2	M/TC-2
Scn2b	M/TC-2
Fstl4	M/TC-2
AI464131	M/TC-2
Npr1	M/TC-2
Lhfp	M/TC-2
Lhfpl3	M/TC-2
Nell1	M/TC-2
Abhd3	M/TC-2
Ptprd	M/TC-2
Sema7a	M/TC-2
Cntnap1	M/TC-2
Rasd2	M/TC-2
Lgi3	M/TC-2
Grm7	M/TC-2
Sidt1	M/TC-2
Fstl5	M/TC-2
Nrg3	M/TC-2
Tspan17	M/TC-2
Igf1	M/TC-2
Kif26b	M/TC-2
Arhgdig	M/TC-2
Samsn1	M/TC-2
Bace2	M/TC-2
Nrp1	M/TC-2
Htr5a	M/TC-2
Nefm	M/TC-2
Cgref1	M/TC-2
Cacng6	M/TC-2
Mrgpre	M/TC-2
Lamc2	M/TC-2
Ptpre	M/TC-2
Ankrd34c	M/TC-2
Tmem164	M/TC-2
Ajap1	M/TC-2
Mansc1	M/TC-2
Slc9a2	M/TC-2
Lgi2	M/TC-2
Jam2	M/TC-2
Mgat5	M/TC-2
A230065H16Rik	M/TC-2
Tspan4	M/TC-2
Mfge8	M/TC-2
Slc24a2	M/TC-2
Cck	M/TC-2
Fam134b	M/TC-2
Adcyap1	M/TC-2
Adam23	M/TC-2
Fkbp1b	M/TC-2
Tspan13	M/TC-2
Ptprt	M/TC-2
Sema6b	M/TC-2
Gabra3	M/TC-2
Syt7	M/TC-2
Kcnc3	M/TC-2
Rspo3	M/TC-2
Cpd	M/TC-2
Kcnk15	M/TC-2
Nefh	M/TC-2
Adam11	M/TC-2
St8sia1	M/TC-2
Rnf152	M/TC-2
Clmp	M/TC-2
Elovl6	M/TC-2
Lynx1	M/TC-2
Olfm1	M/TC-2
Cxadr	M/TC-2
Slc38a3	M/TC-2
Nlgn2	M/TC-2
Mdga1	M/TC-2
Cd164	M/TC-2
Pvrl1	M/TC-2
AF529169	M/TC-2
Slc37a2	M/TC-2
Sdc2	M/TC-2
Lipa	M/TC-2
Fat3	M/TC-2
Agtrap	M/TC-2
Chga	M/TC-2
Cbln4	M/TC-2
Rab3b	M/TC-2
Galns	M/TC-2
Clstn2	M/TC-2
Itga3	M/TC-2
Klhdc8a	M/TC-2
Chrnb2	M/TC-2
Medag	M/TC-2
Clstn3	M/TC-2
Fitm2	M/TC-2
Scn1b	M/TC-2
Zfp804a	M/TC-2
Lrrn1	M/TC-2
Wfs1	M/TC-2
Creg1	M/TC-2
Gdf11	M/TC-2
AY036118	M/TC-2
Cntnap2	M/TC-2
Tnfaip8	M/TC-2
Cntn2	M/TC-2
Tmem178b	M/TC-2
Otop3	M/TC-2
Nceh1	M/TC-2
Cyb5r1	M/TC-2
Thy1	M/TC-2
Tenm1	M/TC-2
Scpep1	M/TC-2
Sorcs3	M/TC-2
Bid	M/TC-2
Gabrb2	M/TC-2
Disp2	M/TC-2
Ntrk3	M/TC-2
Dner	M/TC-2
Adcy5	M/TC-2
Fuca2	M/TC-2
Arsa	M/TC-2
Grid1	M/TC-2
Ephx4	M/TC-2
Slc8a2	M/TC-2
Man1c1	M/TC-2
Gm44210	M/TC-2
Man1a2	M/TC-2
Xk	M/TC-2
Timp2	M/TC-2
Drd1	M/TC-2
Tmem104	M/TC-2
Acvr1b	M/TC-2
Slc27a4	M/TC-2
Chgb	M/TC-2
Mfsd9	M/TC-2
Creg2	M/TC-2
Mfsd6	M/TC-2
Raver2	M/TC-2
Tppp	M/TC-2
Epha2	M/TC-2
Arap2	M/TC-2
St8sia5	M/TC-2
2610528A11Rik	M/TC-2

## Sheet: TableS2.DEGs in fibrosis region
RZ1_fib	RZ2_fib	IZ1_fib	IZ2_fib	FZ1_fib	FZ2_fib	RZ1_nonfib	RZ2_nonfib	IZ1_nonfib	IZ2_nonfib	FZ1_nonfib	FZ2_nonfib
APOE	CRLF1	RARRES2	MFAP4	FKBP5	FBLN2	RETREG1	PDE7A	PLPP3	ADCY5	MYOZ2	POPDC2
SVEP1	MXRA8	MMP2	TTYH3	C1QC	LRP1	PPM1K	SMYD1	TRIM63	HSPB3	NEBL	NNT
TYROBP	AEBP1	COL5A1	CFH	TAGLN	S100A4	PTGDS	HSPB3	NRAP	TRIM54	CDH2	APOBEC2
C1QC	LUM	COL5A2	GAS1	TSC22D3	VCAN	RYR2	AC018464.1	COX6A2	NKX2-5	PRKACA	SLC25A30
CYBA	COL14A1	CDH11	NPL	TYROBP	COL15A1	LPL	C15orf41	ATP5MC1	ADPRHL1	POPDC2	HSDL2
MXRA8	CCDC80	PCOLCE	DRAM1	PLD3	FBLN1	ATP1B1	TMEM178B	CKMT2	KLHL41	MYZAP	CAMK2D
EFEMP1	VCAN	AEBP1	PLA2G2A	APOC1	C1S	MYOM2	PRKAA2	CASQ2	LMOD3	S100A1	MLF1
FOLR2	ENO1	MMP23B	SCD	CTSS	MMP2	VEGFA	FBXO40	VDAC1	TRIM63	LPL	ANK3
HLA-DRA	CYBRD1	SFRP2	SIGLEC1	MS4A4A	PI16	ACAT1	ENO3	GOT1	SMPX	HHATL	PPP1R13L
CD68	DUSP1	VCAN	SOAT1	C1QA	MXRA5	CKMT2	ACAA2	NDRG4	MYLK3	AK1	SLC4A3
ELN	FLNA	C1QA	HAS2	FCGRT	PTGIS	ACO2	F2RL3	TMED7	HSPB2	GOT1	CPT1B
MS4A4A	NUPR1	NBL1	SPOCK1	PLTP	IGFBP6	LRRC2	IL1RL1	TRIM54	SGCG	CKMT2	NDRG4
STAB1	FBLN2	COMP	MYCBP2	CD163	SFRP4	SDHA	MYH7B	RBPMS2	VTN	SORBS2	PDHA1
NNMT	PLA2G2A	FNDC1	TMEM45A	CFH	SERPINA3	ATP1A2	KLHL24	RYR2	CHRM2	ENO3	CYCS
DPT	NNMT	COL6A1	FMOD	C3	HLA-DPB1	SH3RF2	MIR133A1HG	CHRM2	C15orf41	EEF1A2	SCN5A
CD163	RARRES1	FBN1	CD209	ACTA2	NDRG1	KCNIP2	CCDC93	HSPA9	TACC2	CYCS	TENM2
IFI30	ACLY	HTRA1	CR1	LAPTM5	DPYSL3	SLC38A1	MTUS2	MYOM2	GOT1	TRDN	LPL
FCGRT	AKR1C1	COL6A3	MFAP2	MS4A6A	SEMA3C	IDH2	C14orf180	SDHA	CDH13	RETREG1	FITM2
COL1A1	PRELP	EFEMP1	TRPS1	GPNMB	CRISPLD2	FITM2	TMEM182	HRC	TNNT1	MYLK3	PFKM
INMT	METTL7A	SERPINF1	PLEK	CD68	PTN	MYH7B	MYBPC3	BAG3	NDRG4	PDE4DIP	COX14
COL5A1	EMILIN1	THBS2	IER5L	FBLN2	SPON1	TRIM63	TNNI3K	MPC1	SLC4A3	MYOM2	CKMT2
MMP2	PDGFRA	FSTL1	COL4A4	ANXA1	PCOLCE2	HRC	FGF12	COX17	NPPA	CMYA5	RASD1
CFH	BGN	CXCL12	RIN3	C1QB	CYP1B1	CKB	PGAM2	UQCRC2	JUP	NDUFA12	IDH2
PPIB	FMOD	H19	RAB27A	C1S	MARVELD1	MYLK3	KCNH2	PFKM	MLIP	NDUFAB1	HHATL
COL5A2	C4orf48	COL14A1	U2AF2	SLCO2B1	CXCL14	SRL	ADPRHL1	MLIP	PKP2	TRIM63	CYP2J2
LTBP2	RAB31	IGF1	SNED1	APOE	GAS5	CDH2	MYL7	OBSCN	CDH2	NDRG4	ADPRHL1
LAPTM5	SH3BGRL3	COL3A1	PRKCB	MFAP4	ABI3BP	FGF12	F3	NCKAP1	FITM2	ACO2	PEBP4
FBLN5	EMP3	FKBP10	PTX3	MAF	NOTCH2	CYCS	BVES	NMRK2	TOGARAM2	CPT1B	KCNH2
PLTP	SCARA5	CNN2	SLIT3	C1R	THBS3	GOT1	SLC38A1	PFKP	PXDNL	ATP1A3	ATP1B1
HLA-DPA1	PPIB	MXRA8	BASP1	SELENOP	PLA2G2A	NDRG4	TENM2	FITM2	KBTBD12	CFL2	PPM1K
LOXL1	CFH	C1QB	UCP2	LRP1	SCARA5	PDLIM5	VLDLR	LPL	SMYD1	COX7A1	MTRNR2L3
LOX	CLU	MXRA5	STEAP1	INMT	ITM2A	HADHB	PEBP4	GOT2	ENO3	NDUFA5	CDH2
CCN2	FBN1	MS4A6A	SLC18B1	HLA-DRA	GPX8	SORBS2	COQ8A	HYOU1	FHL2	LMOD2	CDH13
VSIG4	MAF	COL1A2	PLAT	NPC2	TGFBR1	NNT	PPP1R1A	CXADR	DIRAS1	XIRP1	MPC1
NOP53	PODN	C1R	VASN	LGMN	CD68	HHATL	PTPN3	RCAN2	GABRA4	NDUFV3	MSRA
CTSS	SNED1	C1S	CHI3L1	FOLR2	ANXA4	SLC2A4	CAMK2D	PDHA1	HHATL	DNAJA4	CD36
EMILIN1	EGR1	SNHG29	HTT	S100A11	PRG4	CPT1B	FHL2	NDUFA6	HIF3A	ALDOA	KLHL24
CD14	THBS2	OLFML2B	SLAMF8	METTL7A	C3	SGCG	AL451069.1	SELENOK	MTUS2	SH3BGR	BVES
NPC2	MGST1	COL16A1	CPXM1	ACP5	COL8A2	MPC1	MPP3	CIAO2B	ACO2	SMPX	FDFT1
FCER1G	GAS7	NNMT	CCL19	FCER1G	MSR1	UQCRFS1	DLK1	MAPKAPK3	COQ8A	TECRL	SORBS2
SLCO2B1	EFEMP1	SNAI2	PTGFR	PODN	TMEM87A	TACC2	CORIN	SDHB	AC006059.1	XIRP2	VCL
TAGLN	FBLN1	COL1A1	RARRES1	ITGB2	TCN2	BCO2	RAPGEF4	PDE3A	GFOD1	ADPRHL1	FHL2
SAT1	PTGIS	TIMP2	PNPO	MAFB	FCGR2A	ATP1A3	MIR1-1HG	SLC2A4	LARGE1	RYR2	HAND2-AS1
ISLR	ACTA2	COL6A2	TRIM14	CYBA	GALNS	MDH2	ANXA3	ESRRA	NCAM1	CSRP3	DCAF6
LGMN	CAVIN3	HLA-DRA	RNASE2	CSRP1	GLIS2	SLC16A7	SMYD2	NCAM1	PFKM	MLYCD	SNHG14
CSF1R	CSRP1	BGN	PRG4	CTSH	ADAMTSL4	RNF150	SCN5A	SLIRP	CLIC5	NRAP	PPP1R3A
PTGIS	LPAR1	OLFML3	SLC35C2	HS3ST2	CMKLR1	COX5A	RRAD	MTRNR2L8	PLIN4	OBSCN	SLC16A1
AEBP1	COL3A1	SPARC	ARHGAP9	CTSZ	RNASE4	MALAT1	AL035078.1	HHATL	OBSCN	PFKM	CFL2
ITGB2	MYH11	LUM	LILRB3	CAPG	NR3C1	MYBPC3	LMO7	CLIC5	BTNL9	RBM20	AIFM1
MRC1	PCDH18	EFEMP2	CCL13	CFD	GAS1	MTRNR2L8	MLYCD	NDUFA12	TMOD1	PPM1K	PFKP
PRSS23	KDELR2	APOE	FMO1	VSIG4	PTPN13	CASQ2	PTH1R	TENM2	DKK3	HIGD1A	RAB3IP
FMOD	AKAP12	MDK	LILRA6	SH3BGRL	COLEC12	GJA1	CD36	EEF1A2	EEF1A2	NDUFA8	LAPTM4B
ARHGDIB	PCOLCE2	ELN	NOVA1	IGKC	TNRC6C	PPP1R12B	TNNT3	ATP1A3	SNTA1	CLIC5	RBM20
LIPA	SPON2	MARCKS	SLC9A9	CPM	GPR153	PKP2	ISOC1	MYZAP	TRDN-AS1	ANKRD9	ZNF181
COL3A1	TMEM219	CCDC80	LINC01503	SLC40A1	GOLM1	PFKM	IP6K3	B3GALT2	PERP	PPP1R16A	KALRN
FBLN2	TSC22D3	CLEC11A	IL10RA	TPP1	SERTAD4	LDB3	CPEB4	SLC41A1	PPM1K	KLHL31	GABPB1-AS1
S100A11	TMED3	IL1R1	NLGN4X	RARRES2	MOXD1	PSD3	SLCO4A1	TIMM8B	LMOD2	SLC4A3	BAMBI
OLFML3	SOD3	NID2	SLC2A10	PTN	ANKRD65	MLIP	PLIN5	PDE4DIP	MYO18B	UNC45B	NCAM1
CCN1	TMEM176A	POSTN	HP	MRC1	ZHX3	ATP5MC3	FABP3	CHPT1	SMYD2	COX6A2	ALPK3
CTSC	ANTXR1	SFRP4	VWA5A	ARPC5	GRK5	CSRP3	GATA4	NKX2-5	PKIA	MLIP	FHOD3
MFAP4	VKORC1	LOX	PHLDA2	SLC1A3	FRMD6	SLC8A1	ADCY5	CKM	BCO2	PFKP	NASP
PRDX4	SERPINE2	CTSZ	VGLL3	LYZ	NET1	NEBL	SMPX	HSPA5	ST3GAL6	PGAM2	ITGA7
GAS5	PCOLCE	ACTG1	TRPM2	NCOA4	AC108488.1	PRKAA2	CLIC5	ATP5F1C	UNC45B	MDH1	ATP1A2
PDIA4	CD248	COL12A1	ARHGAP30	KCTD12	GOLGA7	NDUFAB1	LIN7A	CYSTM1	NNT	TNNT1	SLC8A1
COL4A4	TAGLN	DCN	IRF5	CCL18	SLC46A3	VLDLR	ADGRL4	TACC2	GOT2	PTP4A3	SMYD1
HLA-DPB1	IQGAP1	EMILIN1	OSR2	STAB1	COLGALT2	LDHB	RASD2	ENO3	RMDN2	SYNPO2L	DPY19L2
SERP1	IMPDH2	ISLR	IRF8	SAMHD1	FARS2	PEBP4	ADCY6	MGST3	MYZAP	ATP5PB	CISD1
SERPINH1	TNC	SLC40A1	SIGLEC7	CTSC	KCNK15	GHITM	PLCL1	NDUFAB1	TUBA4A	ATP5PD	MYOM2
FBN1	MFAP5	CYP1B1	NT5E	IFI30	MGST1	NDUFS1	GRB14	NDUFS1	SRL	PKIA	ALDOA
ADH1B	IGFBP6	GALNT1	MRVI1	MFSD1	RTKN	ATP2A2	SGCG	VDAC2	SORBS2	NEK7	PTGES3L
MS4A6A	CUL4B	SULF2	FAIM2	EFEMP1	ATF5	MB	CKMT2	ALAS1	SDHB	ACTN2	MIR1-1HG
SERPINE1	MFAP4	SPON1	PCSK1	SDCBP	MBOAT1	NUDT4	SLC8A1	PTP4A3	ATPAF1	NMRK2	ADI1
SPON1	COMP	LIPA	NABP1	HLA-DPA1	OLFML1	SNHG14	CHL1-AS2	SBDS	PHACTR1	RAMP1	MTRNR2L1
LRP1	C2	PDGFRA	CFB	HLA-DPB1	RABGAP1L	TMEM182	RBM20	CS	C14orf180	LRRC39	ESRRA
HLA-DRB5	AOX1	C1QC	NLGN2	LIPA	GAB2	OBSCN	IL18R1	SCN5A	RBM24	THBS4	DGLUCY
MS4A7	MRC2	SERPING1	IGDCC4	GRINA	GXYLT2	PGAM2	G0S2	OGDH	HSPB8	NCAM1	WLS
APOC1	ABI3BP	ADAMTS2	SCG2	SH3BGRL3	CRABP2	ATP5F1C	HAND1	ZNF330	SMCO1	SYNPO	BZW2
NBL1	CREBL2	MFAP4	TP53RK	ADH1B	TTC17	TNNI3	CA8	PKP2	APOBEC2	VTN	MFN2
IL32	RAB5C	SCG2	NPM3	IGHA1	PTGFR	ANK3	ADGRF5	PGM1	WNK2	MYOM1	MYOM1
MPEG1	TXNDC5	PTGIS	IRAK4	SMAP2	CCN3	LAPTM4B	S100A1	PPP1R12B	HACD1	SH3RF2	PPP1R12B
PAMR1	RHOG	CTHRC1	CD180	PLXND1	LINC01140	PDE4DIP	PERP	CAMK2B	LPL	SORBS1	FSD2
SELENOM	CD302	FBLN1	CDKN3	FUCA1	ZNF512	NIPSNAP2	SHB	PTGDS	ACE2	PDHA1	MYLK3
RNASET2	NFE2L2	FN1	RUNDC1	TMEM119	GGH	ETFDH	NMRK2	HSPB8	ABRA	PDK2	GCNT2
RNASE6	OAF	ASPN	CKAP2	CD44	OSBPL3	MDH1	MED19	ACAT1	MPC1	SRL	MLIP
SNHG25	CP	BICC1	SLC38A5	WASF2	AAR2	COX7B	SORBS2	ANKRD9	MTRNR2L10	MTRNR2L1	CAV2
PCOLCE	PDCD4	MAF	MYO7A	MAN1A1	TGFBR3	ATP5PO	ADM5	MTLN	IGFBP2	HSPA2	MTRNR2L6
H2AFJ	ELN	GADD45B	SASH3	FBLN5	SEC23B	CES2	PROB1	USP2	GJA1	NDUFA10	CERS6
VGLL3	AXL	ABCA1	KCNJ5	LGALS9	TCF3	ATP5PF	FSD2	UQCRFS1	EGLN3	SMYD1	PPP1R9A
PLD3	DHRS3	FCGR3A	MYH11	MPEG1	ACKR2	PPP1R3A	RNF123	ATP6V1D	KANK1	COX5A	OBSCN
ASPN	NRBP1	SNHG5	NUDT15	MARCKS	CASK	NCAM1	CDH2	SLC39A14	MYL7	HAND2-AS1	TRNT1
MYH10	SPON1	CD68	PI4K2B	DAB2	PRR5	MYOZ2	HIST1H4C	NDUFS8	IRX3	CSDC2	AC015813.1
LYZ	OGN	NID1	TRIM25	EPHX1	EML1	PDHA1	CYCS	MAP3K20	HIST2H2BE	LRIG1	PRKAA2
PODN	ANGPTL2	MRC2	GARS-DT	CD14	CCDC102A	ETFA	TSPAN13	HSPB3	USP13	MAP3K20	NMRK2
VKORC1	MYOF	ADAM12	COL4A3	HLA-DMB	ADA	ATP5F1A	HADHB	CYC1	ECH1	CASQ2	UFL1
COL8A1	CRTAP	MMP14	TMEM128	SOD3	SIAH1	RBPMS2	MYOM1	MYBPC3	LRIG1	SGCA	MASP1
GEM	FOSB	THY1	RHNO1	BLVRB	CYS1	MTRNR2L12	PKP2	DNAJB9	RETREG1	HACD1	PERP
ARPC1B	RAB13	RCN1	DOCK8	RASGEF1B	PRRT2	ACADVL	NOSTRIN	DBNDD2	MASP1	LAPTM4B	ATP1A3
CRTAP	LMOD1	GAS5	MT1M	C2	PNMA2	PLIN5	PXDNL	IDH2	POPDC3	UQCRH	IDI2-AS1
PDGFD	PLS3	SSC5D	PDLIM4	SOAT1	ZNF385D	MAP3K20	FRMD5	DAG1	PTDSS1	RBM24	XIRP1
C3AR1	CCN5	CDKN1C	CSTA	EMILIN1	IZUMO4	NEAT1	TRIM63	NDUFC1	PRKAA2	ATP5MPL	SPEG
MAN1A1	ATP8B2	CERCAM	RIOX2	C3AR1	CTU1	TUBB4B	GATA6-AS1	HADHB	KIT	CYC1	GOT1
SRPX2	FXYD5	STAB1	ALG14	OLFML3	TTYH3	RBM24	TM7SF2	GADD45G	ZNF740	LMOD3	SRGN
EIF3F	TLK1	ECM2	GAP43	FXYD5	AC021097.1	NDUFB5	ADRB1	PERP	OXCT1	PACSIN3	ATP13A3
TSPAN4	HMGN1	HLA-DPB1	ATP8B4	OGFRL1	TBXAS1	AQP7	ZNF91	SUCLG1	ATP1A3	NNT	PTPN11
F13A1	COL1A1	ID3	DOK3	CHIT1	CCDC34	COX6A2	ASB10	ATP5PD	CSDC2	GHITM	NDUFA8
FXYD5	SLC40A1	DHRS3	CCR2	MS4A7	NPIPA1	BNIP3	TMEM129	COX7A1	EIF1AY	ALPK3	DMD
LTBP3	PID1	FMOD	ACTG2	CRLF1	GALNT5	HSPB8	FCN3	COQ8A	PGAM2	MFN2	VPS26C
CNN2	PDLIM7	MFAP5	PPP1R26	RGL1	PJA1	COQ8A	RYR2	SLC38A1	ALDOC	SGCG	PPP1R7
MRC2	CAPG	EMP3	NEURL2	S100A4	ANGPTL5	CKM	MYOZ2	IDH3A	TOM1L2	TIMM8B	TYRP1
TGFB1	PPP1R14B	RAB13	CCDC3	PLBD2	ADCK2	UQCRC1	AL080248.1	ATP1B1	LRRC49	GOT2	NUDT4
MARCKS	COL18A1	CYBB	FGD2	CYP27A1	SLC24A1	RCAN2	TECRL	EMC7	NRAP	SYNM	RYR2
COTL1	ECM1	C1QTNF6	LMOD1	ADA2	KCNMA1	TRDN	UQCRQ	CDH2	SLC30A3	CES2	CADPS
TMEM119	G6PD	BNIP3L	MT1A	STEAP4	LRMP	PFKFB2	RNF207	PDE1C	SYNPO2L	HRC	CLGN
PDGFRA	SELENOM	CRISPLD2	ZNF331	TXNDC5	LRRN4CL	LMO7	CARF	NDUFA8	LMO7	UQCRC1	RNF150
TNFRSF1A	PFKL	LYZ	ZFYVE26	SIGLEC1	CADPS2	C6	EGFLAM	RBFOX1	AZGP1	ATP5PO	STMN1
MAF	ST3GAL4	ACP5	TLR7	DNAJB1	EP300	SLC25A3	RIC3	ACO2	SYNM	PRKAA2	CHRM2
FCGR2A	GLIPR1	COL4A4	FCGBP	ZNF703	CAPN5	AC107068.2	CAMK2B	CDK2AP2	CPT1B	EIF1B	ALDOC
NID2	PDGFD	CILP2	PSTPIP2	EMP3	TFAM	CYC1	ZBTB37	ITGA7	ITGA7	DKK3	CTNNA3
C1orf162	LTBP2	GAS1	EPSTI1	FOXO3	EPB41L3	NDUFA5	MDH1	CPT1B	KRT8	MPP3	RERE
RGS4	ERRFI1	CFH	KCNMA1	ALDH1A1	FGF18	FLNC	TRAPPC2B	SORBS1	ANK3	MAPKAPK2	JUP
MANF	LASP1	SELENOP	TMEM170B	SLIT3	NT5DC3	ADPRHL1	AL591543.1	PTDSS1	NDUFS1	NDUFB3	ACSS2
NINJ1	ANXA4	CPXM1	PGBD2	CNN2	FCER1A	CAST	LRRFIP2	C14orf180	DUSP27	SLC16A1	TNFRSF11B
AIF1	GALNT2	THBS3	CD48	UNC93B1	HGF	ATP5F1B	PAIP2B	COX7A2	MTUS1	NDUFS2	MYH6
ARPC5	IL33	C7	CYB5R2	CXCL16	UPF2	HADH	ZNF506	PLP2	DAPK2	DTNA	LYNX1
ZYX	CDO1	WSB1	WARS2	RNASET2	GEMIN5	COX7A1	FBXL22	SLC35F5	PPP1R14C	RBPMS2	TMOD1
OGN	NAGK	PLD3	ZNF467	YIPF3	LSAMP	Z85996.3	CAND2	NOL3	COBL	TRIM54	MYH7B
ADAMTS2	HTRA1	PLTP	SDS	SLA	EVC2	PDE7A	LINC01719	NDUFB3	MLYCD	MRAS	SUCLG1
VAMP8	CCL13	MEG3	OSM	EPB41L2	LEFTY2	NDUFA4	LINC00882	DLAT	KCNC4	MYH6	SLC12A2
SAMHD1	SPRY2	IFI30	CLEC4G	ADGRE5	TRAM2	DLK1	CYP2J2	PDLIM3	CTNNAL1	COX7A2	HEBP2
SIGLEC1	PLP2	CRTAP	GPC3	LILRB5	ANKRD35	ABLIM1	HHATL	NTN4	TECRL	PODXL	MTRNR2L10
MSR1	PTN	NUPR1	RCC1	TNFRSF1B	DDX11	SLC5A1	COX5A	SLC8A1	SH3BGR	JUP	MTRNR2L4
POSTN	TYROBP	PXDN	CLEC7A	JCHAIN	CGRRF1	SLC25A4	LAPTM4B	ETNPPL	CKB	HSPB8	RNF123
PLXND1	SERPINH1	APOC1	SCG5	TSPAN4	LRRC8D	PERP	CASQ2	SLC29A1	AR	FCN3	OGDH
CERCAM	APRT	ID4	APBA1	STK17B	CD24	FLT1	ATP1A3	NDUFB9	ALPK2	MAP4	DARS2
LCP1	NFIX	RUNX1	ITGB8	RAB31	EIF1AD	UQCRC2	LTF	SLC6A8	LINC02762	CLGN	TAX1BP1
DAB2	TECR	NR1H3	EGFL8	THBS2	C1orf52	SLC16A1	EIF1B	PRKAA2	MAST4	DUSP27	ENAH
CYTOR	OSR2	ITGBL1	BRCA2	GM2A	KIF16B	SORBS1	ELFN1	SLC25A11	TRIM55	STRIT1	SMYD2
JOSD2	COLGALT1	STK17B	BATF	TFPI	MGARP	BZW2	FRAT2	C15orf41	DBNDD2	SLC38A1	LETM1
SEPTIN11	FADS2	SHISA5	SH3BP1	LYVE1	C1QTNF7	FILIP1	DHRS7C	UQCRC1	ICA1	TRAK2	TP53INP2
MMP23B	TMEM45A	PDLIM2	TVP23B	IGHG3	MIR193BHG	ASAH1	AKAP6	NDUFV2	SLC2A11	NKX2-5	DIPK1C
CD44	TNFRSF14	COL8A1	DCUN1D3	CCN5	LINC00839	TTN	PDHA1	OPA1	TRIM16	HADHB	FAM117A
LMCD1	HM13	FCGRT	XPNPEP2	CXCR4	SEC16B	PTP4A3	PPP1R9A	GSTO1	CAVIN2	MACROD1	COPS3
ARHGDIA	TRAPPC2L	EVA1B	C12orf75	TNFSF13	CLSTN2	PLN	CEP85	MICOS10	SH3RF2	ATP5MC1	TRIM33
CDH11	TTL	CFB	SAAL1	TNFAIP2	HAPLN3	NDUFA1	UBE4B	NNT	TNNT3	NDUFB9	ACO2
RARRES2	ADAMTS2	DDIT4	MEG8	GLMP	NKRF	FBXO40	SLC5A1	POMGNT1	SNRPN	ATP5MC3	LRRC49
CAP1	LGI4	STAT2	VNN1	RNASE6	ICE2	DLD	ANKRD2	NDUFB6	GPD1L	CRIP3	CRYM
VAMP5	MRGPRF	FRMD6	PUS7	TMEM176A	C2	CPEB4	ACTN2	UGP2	MYOM1	TMEM182	C19orf18
C4orf48	PPP1CA	CTSK	MDFI	PEPD	UCMA	DKK3	SERP2	ETFA	PERM1	CAMK2B	MYL7
CLDN5	PDIA4	GPC6	FAM76B	CD248	SPATA18	ART3	TUBA3E	MTRNR2L1	CHL1-AS2	NDUFC1	AC020659.1
HLA-DMA	SMOC2	SVEP1	SUSD5	CD53	CAMKK1	COX17	NEBL	ADCY5	NAP1L2	REXO2	AGTPBP1
CDKN1A	TSPAN4	MFAP2	MSX2	FCGR2B	DROSHA	ENO3	TSC22D1	NDUFV1	HAND2	ZBTB47	MAP4K3
ECM2	SMIM14	MAP4K4	LINC01176	IGLC2	TJAP1	CLGN	TRMT9B	DKK3	LRRC2	LDB3	ORMDL3
SLIT3	CNPY2	FARP1	IL10	CYBB	PRR5L	ADSSL1	KIF3A	PDP1	PDE3A	DIRAS1	APLN
OAF	TRAF7	CCL18	FAM107B	SH3PXD2B	NUP107	SLC2A1	JUP	CPEB4	PLCL1	FGF12	PDE7B
CD53	SCD	P3H1	HJURP	ALOX15B	ABCA10	PDE3A	KLHL41	RAD23A	ADSSL1	TENM2	RCAN1
BLVRB	CLEC10A	CD163	PLCB2	FCGR2A	AL356488.3	AC018464.1	LONRF2	SRL	LINC02478	EIF1AY	CFLAR
SPI1	TOR1AIP1	PRSS23	GLIS3	RIN3	LINC01133	SLC39A14	ZNF584	ELOC	DTNA	SLC9A3R2	OCIAD1
FCGR3A	LSP1	RCN3	OSR1	PRRX1	MSH3	MTRNR2L10	ADAMTS9	SMPX	LIMCH1	PCBD1	RDH5
IGFBP2	CCN2	SELENOM	WFDC1	LCP1	LY86	MPP3	PPP1R3A	TMOD1	MCRIP2	SVIL	EIF1B
CTSF	PPT1	CCL14	FEN1	HLA-DMA	PRPS2	NDUFB9	SH3RF2	ABLIM1	SGCD	ATP2A2	SLC39A14
CTHRC1	GAS1	PML	WDR19	CTSF	TRPS1	DSP	MTERF2	EZR	TANC1	DPY19L2	LINC02762
LYVE1	BASP1	MOXD1	ROR2	OTOA	RNPC3	DECR1	LDB3	FHOD3	PACSIN3	ANK1	RANGRF
CD302	TMEM35B	CFI	TMEM268	MYH10	WDR41	ATP5MPL	SCN2B	IRX3	ART3	FBXO32	EGLN3
EFEMP2	AOC3	PPIB	CCDC14	TNFRSF14	TTC31	NDUFV1	FAM189A2	PDHX	GYS1	DSP	LRRC39
EVA1B	CERS2	PODN	PTPRO	MSR1	BNC2	KLHL31	MYZAP	ATP5F1D	LYNX1	OXCT1	CRNDE
EMP3	LMAN2	ZFAS1	KCNMB1	THEMIS2	DENND6B	FHL2	SLC16A1	CLGN	PPP1R16A	CILP	VWC2
COLGALT1	PAMR1	VKORC1	TBX18	GBA	FAM222A	TRDN-AS1	COX6A2	MAPKAPK2	PEBP4	TGM2	HIST1H1C
YPEL3	ADGRA2	FST	SERPINA5	COTL1	LDAH	SLCO4A1	VPS13A	VTN	BVES	CAP2	CASQ2
LBH	COPE	SEPTIN11	BDKRB2	SLC15A3	PTK7	ASB15	FITM1	APOBEC2	STXBP6	PLPP7	NDUFS2
THBS2	AP2S1	GPX8	SLC22A18AS	GLIPR1	HTRA2	CLIC5	TNIK	POMP	KCNH2	SAMD4A	ACE2
SSR2	RCN3	PDGFRL	SH3TC1	ATP6V1B2	ACD	USP13	MITF	HIGD1A	PROB1	PSMD8	IPO5
TGFBI	EVI2A	HLA-DPA1	CD200R1	F13A1	CDON	SGCD	DSP	AL136171.2	CA4	ACAT1	NDUFAF4
SH3BGRL	ARF3	RAB31	ANKS6	NAGK	CDO1	MLF1	EPN3	PGAM2	EGFLAM	NDUFA6	PHLDB2
C11orf96	COTL1	ARPC1B	SOCS1	TMEM176B	TMEM183A	CACNB2	PRAG1	VDAC3	TMEM38B	CYP2J2	NDUFS4
PXDN	OLFML3	DEPP1	AL691432.2	SMIM3	LPAR1	TECRL	FNBP4	THSD4	SLC2A4	PPP1R12B	CHD7
CNPY3	SUMF2	TMEM45A	NFATC2	WIPF1	ANGEL2	VCL	HSPB7	PCNT	NOL3	MCRIP2	BAG3
C2	JOSD2	TTC3	TRIM9	AOC3	RNLS	INSR	LPL	HYAL1	DPF3	PKP2	OXCT1
GADD45B	ATF6	SH3BP5	RALY-AS1	GPR34	CCL18	BTNL9	PDLIM5	MACROD1	RNF207	PLIN4	AKAP6
HCLS1	STAT6	VGLL3	JRK	THY1	ALKBH3	SLC41A1	TP53BP1	BOLA3	PDK2	LMO7	CLUH
CHID1	TMEM14A	HMOX1	RET	FPR1	TTC39B	GOT2	ABLIM1	HSPA1A	RBKS	OGDH	RASD2
FOS	FIBIN	VMP1	COL8A2	PDGFD	ITPR3	RBFOX1	PDP1	DBI	AC099508.1	SNHG14	CASZ1
LSP1	COL5A2	COPZ2	CLDN11	IGSF6	ZCCHC7	CXADR	SRPK3	ST3GAL1	AC004233.2	TACC2	ZNF772
SIRPA	SHC1	EDIL3	NR4A2	SLC18B1	VAMP4	IMMT	SLC29A2	PKIA	FHOD3	NOMO1	PPME1
TCN2	TGFB1I1	PLXNB2	PIGB	SPRY2	TCAF2	PLIN4	NDUFA5	NIPSNAP2	VLDLR	SDHB	TMEM71
LASP1	WASHC3	SDC3	NFAM1	OLFML2B	SLC18B1	TRAK1	MYOM3	STARD7	HSPA2	ATP1A2	SMPX
DSE	SAMHD1	RBM5	B3GNTL1	TMIGD3	METTL7B	SCN5A	CERS6	NDUFV3	SORBS1	TRAK1	NHLRC2
MAN2B1	RAB34	RAP2B	SLC2A9	RGS10	WDR7	COX6C	GUCY1A2	ATP5PF	IRX6	SCN5A	RB1
AP1B1	MAN2B2	ZNF703	MEAK7	BICC1	GPBAR1	WFS1	EEF1A2	DPY19L2	LINC02208	MPC1	TUSC3
ZFAS1	CORO1C	CD14	PIK3CG	MCOLN1	LPCAT2	DST	OBSCN	PSMD8	SLC2A1	TSPAN9	TMX2
CXCR4	FAM107B	CD248	GPR65	RNF13	GALNT7	TRIM54	NUDT7	PDE7A	ZNF625	TXLNB	RBPMS2
SPON2	MEDAG	PLSCR4	ZNF557	TTYH3	AZIN2	POPDC2	ALAS1	MDH2	ASB2	PDLIM5	RXYLT1
AKR1A1	SUSD2	IMPDH2	BMPER	LCP2	F2RL1	YBX3	GJA1	PSMA7	CYP39A1	NDUFB10	ANAPC10
CPM	SNX9	DNM3OS	AL118506.1	TBXAS1	CC2D2A	NR4A1	RETREG1	CLTB	IPP	FLNC	NSD2
TXNDC5	GLMP	SCRG1	PNMA2	ERRFI1	PHF6	LRIG1	DAPK2	PNPLA2	PDE1C	BZW2	ACADM
IFI16	CENPX	CTSS	TRERF1	ISLR	CAMKMT	ITM2A	ART3	LARGE1	"MARCH11"	NDUFS1	SGSM1
ITGBL1	CD44	CCN5	CD300E	MMP19	APCDD1L	AASS	EXOC6	NCEH1	ETFDH	COX7B	SLC6A8
HLA-DMB	LMO3	VASN	NOTCH2NLC	AIF1	GPR1	SDHB	CPT1B	MASP1	RRAD	PERP	TFRC
ACP5	IGF1	LTBP3	ADAT1	NGFR	CEP126	SLC25A12	MAST2	XRCC6	UBE2QL1	ADAM23	MRAS
COL16A1	PCSK5	METTL7A	CCNE2	LOX	CD72	FITM1	LIN7B	BNIP3	ALS2	MYBPC3	SIRT5
GLIPR1	SORBS3	TSPAN4	AOX1	DAAM2	COL10A1	BVES	SVIL	PPM1K	FXR2	SLC2A4	CACNB2
IL10RA	ABL1	CYBA	LDLRAD3	SPI1	BEST1	EEF1A2	ATP5PF	AC018464.1	AC087457.1	AQP7	MOB4
SH3D19	HSD17B11	CHD3	ANKDD1A	IGHG4	GTF2H3	ANK2	FLT1	SH3RF2	PPP1R1A	USP13	SLC5A1
PENK	PDGFA	GLMP	LINC01426	SRGAP2	HINFP	APOB	F8	MPC2	DPY19L2	PDCD5	SLC38A1
CCL18	MARCO	CMKLR1	PCED1B	CLEC4E	C4orf46	SYNE2	NPHP3	FH	CITED4	SLC8A1	VDAC3
DHRS9	KXD1	LXN	UTP15	LAIR1	GID4	CORIN	CLIC6	NDUFA5	GATA6	FBXO40	PON2
LAIR1	ADAMTS5	ARL4C	LHX2	CD37	POC5	B4GAT1	AC023494.1	CD55	APOLD1	AKAP6	USP13
COL14A1	SLC15A3	ITGB2	AC027031.2	PIK3IP1	ERO1B	F8	PLSCR1	SLC2A1	CES2	HYAL2	DTD2
NUPR1	CTSK	CD44	HPGDS	LILRB4	ZBTB43	MAST4	LINC00641	GYG1	RIIAD1	PEBP4	RNF10
TNFSF13	SRSF9	SEPTIN9	CXCL14	AMOTL2	PIGX	ATP5PB	LUCAT1	NDUFA7	DENND5B	LRRC2	MYL4
XBP1	DOP1B	KCNE4	HRH1	RAP2B	PCDHB7	ZBTB20	ZNF431	SLC4A3	COL23A1	CAST	DBT
ABI3BP	PRELID1	CARHSP1	HAS1	GPC3	SLC38A6	PKIA	RD3L	LAPTM4B	DSP	MLLT11	KLHL20
ADORA3	ADD3	FCGR2A	MCM9	CHCHD6	CACHD1	TENM2	PLD6	CMYA5	ETV1	DECR1	AUH
NGFR	MAGED2	ABI3BP	CBLN1	BCAT1	HOXB4	ATAD1	APOBEC2	CAST	SLC29A2	ATP5IF1	RCAN2
SDC3	COL5A1	OSR2	ITIH4	FYB1	NSUN6	CHRM2	IDH2	NEBL	MYOM2	SUCLG1	DENND11
OMD	UBE2E3	SH3BGRL	IQCE	ANXA4	CD33	NDUFB4	CD3EAP	HSF1	TMEM182	ABLIM1	SDHA
IMPDH2	DPT	PLSCR1	PDCD1	MYH11	MMP16	MYZAP	COPS5	ACADM	SLC41A1	RABGAP1L	BOP1
MAFB	FAIM2	SERPINH1	MT1F	MGST1	HTR2B	ANKRD2	LRRC10	PHB	CAP2	KIF1C	MYO18A
MFAP2	CLPTM1L	LTBP2	CENPF	UCP2	ACP6	SCARA5	VWF	AKAP6	STAU2	UQCRC2	ZFX
UCP2	ISLR	HLA-DQB1	AC010969.2	CNPY3	MZT1	AKAP6	AC068700.1	FEM1A	TENM2	PFKFB2	OSBPL11
CDC42EP1	NTAN1	HNMT	TSEN54	MYO9B	PRKCA	PRDX6	AC022034.1	CFLAR	AL513217.1	HADH	MTRNR2L11
EPHB3	MYO9B	FGF7	SCAMP5	COLEC12	ERMARD	BSG	RBP7	ATP5IF1	CLGN	COQ9	PITPNB
IFNGR2	SGCE	INAFM1	ROM1	P2RX4	ZNF668	FRY	ECH1	MYOM3	ZNF330	BOLA3	PNMT
IGKC	PLXND1	SIGLEC1	STK32B	NAGLU	C9orf85	NDUFA6	BNIP3	MICOS13	MYH7B	CYB5R1	RRAS2
RAB13	CSF1R	IL10RA	HMGN5	EVI2A	TRIM6	PGK1	LINC01405	PPP1CB	PCCB	HSPB3	YJEFN3
NRBP1	LDLRAP1	CCNG2	GCK	SCARA5	WNT5B	ACADM	ATP5MD	ADSSL1	TMEM25	DUSP26	SGCG
SDF2L1	CERCAM	PLOD2	ANKEF1	CTSK	FBXO10	RBM20	ZNF234	CACNB2	PLPP7	FGF1	ANKS1A
COL5A3	MT1G	IGBP1	SLC22A16	RETREG2	EPSTI1	METTL7B	LNX1	HK1	AC138649.1	DLD	LCLAT1
FADS2	LEPR	IFI16	LEP	CD3E	SHF	PAM	NDUFAB1	FITM1	FASTKD2	ITGA7	RD3L
COL12A1	BICC1	FAM20A	CENPE	MOB3A	PLAAT4	DBNDD2	GADD45G	GPD1L	MYH14	NDUFB4	CHCHD3
IRAK1	NOTCH2	SSBP4	GASK1A	PARP4	SGK3	GPD1L	PLAG1	NDUFB4	MOCS2	UQCC2	CAPN10
CAPG	HNRNPUL2	NABP1	HIST1H3D	IRAK3	ZSCAN22	ZBTB16	LINC01186	DDT	HSPA1B	COX20	MYOM3
WIPF1	FKBP10	KIRREL1	KIF20B	ZNF217	THG1L	CRIP2	BCL11A	ADPRHL1	KCNJ4	FITM2	RAP1GAP2
PYCARD	SPNS1	TNFAIP2	SCIMP	SSBP4	ZNF343	SLC4A3	AL136171.2	ECI1	CORIN	LINC00881	PUDP
FUCA1	CDK4	HLA-DMA	SFXN2	EEF2K	ZNF701	CYB5R1	INKA2-AS1	SAR1B	LINC00881	PINK1	ST8SIA2
TNFRSF14	APOBEC3C	CTSO	ALOX15B	VGLL3	UST	SNTA1	BSG	NPPA	OBSL1	COX17	TTC39A
CNN1	RARRES2	CYBRD1	MRAP2	APH1B	AGPAT5	MYOM3	EYA3	RBM24	STBD1	SMYD2	RNF207
GPR34	SVEP1	PTGS1	KCNQ3	ST6GALNAC6	DOK6	ARL6IP5	ARID4B	KLHL41	CORO6	ETFB	SLU7
GLMP	NIBAN2	HLA-DMB	TRAF1	CCR1	GPR68	NDUFA8	FEM1C	FBXO40	CADPS	PYGB	INSR
CAPZA1	TKT	CCN2	NKD2	SLC31A2	HSD17B7	MARK3	RGS5	LRIG1	SRXN1	ECI2	CTNND2
ALDH1A1	RUNX1	TNFRSF14	CDCA3	IL10RA	PIF1	NDUFA12	AC116351.1	COX5A	ALAS1	TUBA4A	GFM2
IL1R1	TPD52L2	C2	NRG1	PDGFC	TRIM34	TNRC6B	DCUN1D2	SLC35B1	KRT18	NDUFS7	SEMA6C
MFSD1	RNASET2	TRBC2	SAP30L-AS1	EBF1	AC093627.4	PCDH7	MMACHC	IMMT	KCNIP2	SLC6A8	FGF12
PPP1R9B	TGFB1	ITGA11	PRDM6	SMIM25	CUBN	NEXN	PHLPP1	RBM20	AC087588.2	PALMD	ASIP
TBXAS1	ZNF423	RNASE4	SLC66A1L	NRP2	HTATIP2	HIF3A	PDE1C	KCTD9	ANKRD9	DOK7	GAB1
HLA-F	ERGIC1	SIDT2	KCNA5	SNX10	AP5S1	C15orf41	ELOC	LMOD3	CAMK2B	APOA1	SYNM
ENC1	C3AR1	SOCS3	CGAS	RBM47	AC245297.3	AFG3L2	CD274	SPCS3	SGCA	MYPN	BCOR
PPT1	DPYSL3	TMEM119	PRPH2	PLA2G2A	ADAMTS17	STARD7	FMC1	SEC61G	KIAA1958	MTRNR2L8	LCMT1
NPL	SH3BP5	P3H3	AC091057.6	FAM13A	FAM167B	COX5B	SAMD12	NDUFS2	BAIAP3	SDHA	FBXO32
DPM3	THBS3	PLAAT4	ITGA8	FADS2	TMTC2	PALMD	MDM1	DLD	PTPN5	ATP6V1D	TBRG4
SCUBE2	NTN4	HGF	AATK	BOC	MAPK13	SELENOK	DPY19L2	NDUFC2	ARHGAP15	KCNIP2	BCO2
KIAA0930	PAPPA	GOLGA8A	ZNF337	NSMF	SLCO5A1	AZGP1	SMAD1	POPDC2	PLAAT3	VDAC3	NSMCE2
PTN	CSTA	SERPINE2	RASGRP4	IGLC1	ELAC1	PTPN3	LINC00467	TLCD4	AKTIP	CLUH	CSAD
CCL14	SMAP2	NGFR	AL135905.2	CHST11	GREB1	CMYA5	CDIP1	TOGARAM2	CASTOR2	CS	IFT81
UNC93B1	ANGPTL5	LAMA4	AC019080.6	PLA2G7	TET3	CD58	KL	CYB5R1	DIPK2B	MIR1-1HG	MED15
FKBP8	ERGIC3	TNS3	NFKBID	IGHG1	VILL	ATP5PD	ZSCAN31	PPP1R3A	OSGIN1	TSPAN12	PPP4R1
MDK	SESN3	TYROBP	AC016747.1	CCL4	AL445426.1	TM4SF1	SLC25A4	TMEM182	CYP2J2	ESRRA	DIRAS3
ARAP1	AP1B1	CASP4	B9D1	KLHL6	S1PR3	OXCT1	ATP2A2	PDK2	AC104211.2	DIO2	MYO18B
LOXL2	TMEM243	MAN2B2	SEMA7A	SLC35D1	PRRT3	DTNA	TRIM68	MYOZ2	AC092171.4	FAM177A1	PKP2
CCL5	PILRA	ADA2	SIRPB1	TMEM255A	WDR19	SMPX	SYNPO2L	PEBP4	RAD54L2	CRYM	IGSF9B
CD4	ZMAT2	FBLN2	ADAT2	MYO1E	BMP5	TSC22D1	AL953883.1	EIF1B	CDC42EP3	FABP3	TOP3A
NCF4	GPX8	ELK3	FANCM	PDGFA	ENPP1	LNPEP	EHHADH	PSMD2	SLC5A1	DST	TRDN
TMEM160	COL12A1	SOX4	MMP17	EVI2B	HOXB-AS1	LMOD3	SLC16A12	ATP5PO	SLC20A2	HTATSF1	DTNA
GRB2	C9orf16	EVL	PLEKHH2	DPY19L3	ZNF607	TANC1	CKM	SMYD2	TNFAIP8L1	ASB2	SPX
MYDGF	GJA5	RAB34	GDAP1	NPL	PSAT1	HSPB3	NAA35	ESRRG	GUCY1A2	NDUFB1	ACSF2
ANGPTL2	FCGR2A	WBP1L	PAPLN	NCF1	ICE1	VDAC2	CHRM2	FBXO32	HDAC11	RAB15	FAM214B
AP2A2	NME1	GPX7	LINC00310	SCARB1	WASF3	SGPP2	MYL3	ETFDH	TCF15	MAFK	RNGTT
RCN3	JAG1	TTLL3	CRISPLD1	BMF	HIGD1B	GPAT3	NPPC	MTRNR2L10	RGS9	ATP5F1C	COQ6
VMP1	ARRB2	LY6E	HDAC10	LY96	TCEAL5	PTDSS1	MYOM2	SLC25A12	TTC39A	UQCRFS1	UNC45B
HMOX1	POSTN	FLRT2	PARP15	STXBP2	ZNF746	GABARAPL1	HAND2-AS1	ATP6V0E2	TJP1	IDH2	ANKRD2
IGF1	CREB3	YPEL3	CD200	SKAP2	PLAUR	SLC25A30	MYH6	USP13	ALPK3	PRDX2	CFAP61
TNFAIP2	ACP5	NOTCH2	SBSPON	COMP	COMMD10	ATP5MC1	ATP5F1B	CPNE5	TXLNB	PCDH7	ZNF330
GAA	PTPN18	GALNT2	XYLB	FGD2	CCNH	CAMK2B	LINC00472	S100A1	RBFOX1	SUCLA2	RBM24
CD37	LBP	STEAP4	IL12RB1	GZMK	MAPK11	TXLNB	TRDN	B3GALNT1	FBXW7	ADSSL1	ZNF783
ARRB2	DUSP22	MARCKSL1	FPR2	ALCAM	CHAD	TLCD4	NUDT13	PPP1R14B	PPP2R3B	MSRB2	PGAM2
GIMAP5	LOX	ZMAT3	ZC3H12D	GPM6B	CNTLN	PERM1	SLC7A6	DSP	CASZ1	LIMCH1	BCAS2
HEXA	IL13RA1	CHST15	EXOSC10-AS1	LST1	NINJ2	MCRIP2	PRR34-AS1	VPS13D	SIPA1L2	SLC5A1	ZYG11B
FSCN1	SAMSN1	CMTM3	SMAD9	NTRK2	EFNA4	TM7SF2	AC104211.2	HEBP2	LINC02334	EIF5B	CDK1
CYBB	GBA	SLCO2B1	COMP	SCG2	ZFP14	AMD1	ZNF568	AK1	TRMT9B	NDUFS8	KCNJ2
PPP1R18	PDPN	OGN	LILRA5	VNN1	ZBTB24	AL035078.1	CA4	MYLK3	FADS3	FHL2	ZNF844
LSM7	POLD4	ICAM1	LMO3	OSR2	PTPRO	"MARCH6"	RIMKLA	PLCL1	A2M-AS1	PGM1	TSPAN2
C1orf198	VWA5A	DRAM1	S1PR4	GPSM3	SPAG16	NCEH1	ARMH4	GHITM	KLC4	SLC25A11	KLHL13
PLXDC2	EBF3	ITM2C	HIST1H4J	TGFBR1	ANKRD42	MTRNR2L1	PPARGC1A	SDHD	L3MBTL1	VDAC1	NDUFB3
JUNB	ACKR3	JAK3	EPB41L4A-DT	KCNJ5	LANCL2	TXNRD1	RNF150	XIRP1	ASPG	MYOM3	TXLNB
HNMT	NTRK2	WIPF1	RASL10A	ARHGAP45	GART	PPTC7	HADHA	MAPK4	PITPNM2	CCDC141	VPS29
FCGR2B	UCP2	TRAC	MEG9	ITGAX	POLK	NDUFB6	HCN4	DIRAS1	C11orf21	PTGES2	UBE2H
UBXN1	MYOC	FCER1G	AC027307.2	ITGAD	CERS1	NDUFB10	CHCHD10	UBE2M	CCL26	MYH7B	CRLF3
PML	HS3ST2	FMO1	PIMREG	FGR	MZB1	AKAP1	ZNF736	PRDX2	DLG4	NIBAN1	NLRX1
BTBD2	MCOLN1	LINC02593	AURKB	NFAM1	SNAI3-AS1	AKAP9	RSRC2	ECI2	NRTN	AC018464.1	TET2
CTSK	TNFSF13	NLGN4X	AP002748.4	CEMIP2	U2AF1L5	EIF1B	SEMA3E	PSMA6	TLL2	CAND2	TMEM245
PLVAP	GNG12	PDIA5	AL391807.1	CMKLR1	RNF214	SUCLG1	ZNF805	FXYD1	GATA6-AS1	TM7SF2	HIF3A
IL13RA1	CDKN2C	CPXM2	MSH5	CCL5	BCL2L12	TMEM245	KRT8	KLHL31	PAQR9	THSD4	TBC1D4
UBE2L6	DTD1	TRIM22	STARD7-AS1	PIK3R5	CNIH3	AKAP13	HSPA4L	PDHB	AC091544.2	RILPL1	PALMD
SLA	HLA-DMB	PSEN1	RELN	GPC6	PTGER2	AL136171.2	EPM2AIP1	PLPP7	LOH12CR2	RRAD	ZDBF2
PTGS1	NCOA7	SMOC2	PRRG4	CLDN11	RRS1	TNNT1	MIR4458HG	RNF10	ADAM23	GMPR	AC020909.2
S100A9	FRZB	MSR1	PAXIP1-AS2	RAB32	LINC01715	PLCG2	TM4SF18	ILVBL	AC005342.1	XPR1	RETREG1
SPOCK1	ORAI3	COTL1	DEPDC7	IRF8	TARBP2	PSMD11	SON	SUN2	AP4M1	SLIRP	SLC2A4
HLA-DQB1	SLIT3	IGDCC4	IGHG2	FOXRED2	TRDMT1	NDUFV3	BRICD5	CYCS	SLC38A1	YAF2	TRDN-AS1
ITGAM	DTYMK	MMP19	ARHGEF19	GRK3	KPNA5	NDUFB3	TOB1	PPP2R1A	ACADM	ANKRD2	OXSM
FKBP10	MDM2	SEC24D	SUV39H2	KDM5A	TRIM32	THSD4	PRDM16-DT	KPNA4	FRY	ECSIT	ACAA2
SEC61B	TCN2	HIC1	SEC16B	CD8A	C5AR1	VDAC3	TMEM267	ACAA2	HOMEZ	KIF21A	CAPN7
IGHG3	TMEM179B	TNFRSF1B	ERN1	PARD3B	CTBP1-DT	CFL2	NCAM1	KLHL7	KLHL3	ANK3	RAPGEF4
RAB34	TXNDC12	PIM1	ZSWIM3	LYN	AC004846.1	N4BP2L2	NDUFA1	TSPAN9	AC132217.1	PDLIM3	TNRC6C-AS1
IGHG1	SPOP	GOLM1	CYP19A1	MR1	STC1	VPS13A	PSMG1	ATP5PB	KCNJ11	KIF22	AL031058.1
MAZ	EMB	LAPTM5	AC083964.1	CDO1	DUOX1	TMEM246	SLC30A7	FEM1C	DACH1	CRLS1	LAMA5-AS1
TKT	SH3PXD2B	RGS2	CHEK1	CD52	LINC01023	PPARGC1A	EMILIN3	ART3	APBB1	MGST3	LINC00881
RGL1	STEAP1	SRSF6	DLGAP3	LILRA6	FRYL	SDC4	PUM3	CKB	PEX1	HSPA9	BORCS6
PGF	RNASEH2C	RRBP1	TPBGL	ARL4C	AC009403.1	CDH19	PATJ	LRRC10	CDC37L1-DT	TRDN-AS1	SGCD
CCM2	RIN3	FKBP11	TICRR	KLRB1	LRRC8C	ZNF330	USP2	SORBS2	ALDH1L1	ETFDH	RALGAPB
PTPRC	NAGPA	FBLN5	COL24A1	CR1	FICD	HSPA9	FGF1	TFRC	ENTPD2	AK4	PRDX3
MYO9B	THOC2	LASP1	AL390755.1	TMEM37	USP21	SLC6A8	ID1	HADHA	MIR1-1HG	CMC4	PNPLA7
PRKCSH	MCAM	ECM1	SAMD11	CCL21	MAD2L2	NDUFV2	MEF2A	DECR1	ZNF793	VEGFA	ATAD2
MPZL1	ERLIN2	FOS	GLB1L	S1PR2	LINC00844	PLAAT3	KCNS3	LRRC2	ZNF710-AS1	ACAA2	PSMD6
TNFRSF4	TNFSF12	MAN2B1	TOX	ANPEP	AC036176.1	AL591543.1	SETD6	CHCHD3	GATA3	RMDN1	SLC7A2
PRELID1	MICAL1	TENM4	ITIH3	ZNF524	CDR2	LMOD2	SLC4A3	HSDL2	ARHGEF28	ETV1	PLPP6
GALNT10	TWSG1	BASP1	PCNX2	IGLC3	ZNF34	IGFBP5	ACAT1	GPI	FGF12	CACNB2	MTFR1L
PHLDA3	PIH1D1	DNM1	NIM1K	ANGPT2	MUC20	DLAT	CEP112	ANO5	MSI2	COA1	PDE7A
PI16	ITIH5	PLXND1	CGREF1	FGF7	NME5	SLC14A1	TBC1D7	GTF3A	NEK11	NDUFB11	GIMAP6
STAT2	NET1	IFITM10	AC009948.3	LILRB3	AFF3	IP6K3	GTPBP10	BCAP29	SLC25A35	FXYD1	TOR1B
ADAP2	CD4	GLT8D2	HIC2	GNB5	MFSD9	CERS6	IKZF2	NDUFS4	AP003472.2	SPAG7	NECAP2
CALHM2	SNHG32	BMP1	AC011899.3	STON2	TOPORS	BDH1	EML4	ATP6V1E1	TIMP4	OPTN	BBS2
AIP	UBA7	SEZ6L2	ADAMTSL1	CDKN2C	ZNF85	NDUFA9	RWDD3	UQCC2	ZADH2	HSF1	TMEM182
MOB3A	HNMT	ROR2	FGFR4	PARP11	KYAT1	MIR1-1HG	PDE1B	RNF150	PLK2	FAM162A	HJV
RAP2B	COL4A4	MYC	SMOX	NCKAP1L	BBS9	GPI	MTG2	SDC4	DMKN	TMOD1	PGM5
FAM89B	VGLL3	TXLNA	CPA3	MPHOSPH6	MCC	PDE1C	BZW2	CCDC47	TBC1D32	FAM229B	TOMM34
MARCO	GLIPR2	IQGAP1	AL356599.1	ENPP2	AC104530.1	KCNJ8	PUS3	ALDOC	TPD52L1	CRELD1	WDR36
ITPRIPL2	CD53	FOLR2	SYT17	YIPF2	KCNG1	CISD1	PRDM4	CAV2	ADAM11	PALM2-AKAP2	ST3GAL1
MXRA5	AHNAK2	MYH10	IGSF21	TFF3	MFAP3	SLC7A2	GSS	MYPN	AFF3	MTRNR2L10	DMPK
PPP4C	RAP2C	DDAH2	LINC01750	CD2	ZNF235	MCCC2	SLC25A32	NOP10	KANK3	PENK	SRL
MOXD1	PTGS1	C3	SEC14L2	CDKN2B-AS1	KANTR	MTLN	CADPS	UBR3	LOXL4	HIST2H2BE	GLRX2
NFAM1	VAMP7	FAM20C	FHL5	TBX15	QRSL1	TCIM	GCOM1	SMYD1	AUH	SLC25A12	NMRAL1
CORO1A	FGF7	APOL4	CAPS	LINC01503	SLC9A7	ACOT11	AC097376.3	KCNIP2	PDP1	SLC39A14	LIN9
LCP2	CHI3L1	RGS10	TMCC1-AS1	PTPRU	FADD	COQ10A	PERM1	FASTKD2	MLF1	SLMAP	LRSAM1
SRM	GFPT2	HMCN1	MBLAC1	ZNF790-AS1	HMBS	DYNC1I1	PROX1	CERS6	DSG2	ALDOC	HYAL1
SSC5D	SULF1	EPB41L2	ASGR1	CYTIP	WDFY4	GALNT16	TACC2	PCDH7	ADAMTSL5	LAMTOR5	CPEB2
P3H1	MUSTN1	FSCN1	CALHM6	IGHGP	KRBOX4	NDUFS2	SORBS1	NIBAN1	RNF150	CCDC69	EBNA1BP2
FAM174C	SCARA3	PYGL	TPRG1	FAM107B	LINC01004	PXDNL	CHSY1	HSPA1B	DIPK1C	MYH14	TBC1D7
CD52	TSKU	NPL	NLRC4	JAML	SEMA6A	PPP1R16A	PDE3A	COX14	SPHKAP	SLC16A7	PGBD5
PEPD	CUEDC2	RBP1	LINC01963	ADCY7	CHST11	MAOA	AC040970.1	SLC16A1	HAND2-AS1	ADRB1	STAM
TRBC2	SIGLEC1	SORBS3	SERPINF2	CHRDL1	GALNT8	NQO1	RAMP3	NDUFB8	RAPGEF3	GPD1L	S1PR1
MMP14	AP2A2	TMED3	ARHGAP39	LONRF1	ERI2	DSG2	DEFA4	CACNA1C	HIST1H1C	SLC25A30	COQ8A
ADCY7	IGHG1	FAM114A1	AC027279.1	GBGT1	MAGI2	SMYD2	TGFBR3L	DSG2	ELOA-AS1	PAIP2B	TRIM63
OLFML2B	SNX2	SH3D19	EVA1A	PLEK	GCNA	ADRB1	RBFOX1	PSMA3	CTNNA3	NDUFA9	PIMREG
GRK2	MS4A4A	DAPK1	SSUH2	UBOX5	KNTC1	ILVBL	ZNFX1	INAFM2	CADM1	FKBP3	HSPB3
LY86	IL16	CYBC1	ZNF280C	SNTB1	LIN7A	APOBEC2	SGK1	PCMT1	P2RX3	COL22A1	FANCF
HCST	CCL18	NRK	LINC01315	IGSF10	AGAP9	ARHGAP5	PLEKHA5	SGCA	ADRB1	PROX1	GLRX
MCOLN1	PEPD	NEK6	FGFR3	INPP5D	EFNB3	DPY19L2	MORN4	DUSP3	ANKRD2	SPTB	GATD3A
LILRB5	APMAP	PTBP3	TBX15	DNASE2B	CEACAM21	AAK1	ZNF184	GPR22	MIR133A1HG	SBDS	AFAP1L1
ARSA	SLC7A8	ID2	GLI1	SLC9A9	PIM1	HIGD1A	C19orf18	CRELD1	MYPN	FAM207A	SNTA1
DAP	CYP19A1	IGSF6	RAB38	DENND2D	RABL2B	LRRC39	TNNI3	ABHD2	AL451069.1	CPEB4	GABARAPL1
IFITM1	GCHFR	NFATC4	EFHC1	APOC2	TRAPPC13	PDZD2	AGO4	AFG3L2	CHST9	DUSP3	HAGH
MELTF	SLC16A4	LITAF	AC092747.4	LPXN	AL049795.2	NNT-AS1	BRSK1	ARHGAP5	OPLAH	NPTXR	ARAP3
PLA2G7	DOCK11	C5AR1	DKK2	AMDHD2	ASTN2	CCDC141	MYL12A	DHRS7	LINC00663	GPC1	TSEN34
ADAMTSL2	CHD3	WDR81	C3orf67	SUSD1	MC1R	GPR157	PTPN5	SUCLA2	SCN4B	CAMK2D	P2RX1
SBNO2	TP53I11	SPOCK1	PARS2	HSD17B14	AP000547.3	ALDOC	ERVMER34-1	NDUFB1	ANO5	LYNX1	PCED1B-AS1
GMFG	SLIT2	MS4A4A	AC008556.1	SESTD1	TLR2	TBC1D4	MFN2	DMPK	SUCLA2	CA4	XPR1
ALDH18A1	CARM1	CFP	CCDC125	ECRG4	GTF2IRD2	MTUS1	KCNN2	PPTC7	ITGB1BP2	NDUFA7	CAMK2B
CMKLR1	ZNF516	SNHG32	SLC24A3	LINC00924	LRRC15	CS	CFL2	SYPL2	FRMD3	COBL	NAP1L2
RUNX1	CCDC3	SPON2	DIO3OS	LINS1	NPIPB2	AL159166.1	IGSF5	SLC12A7	ABCC8	GALNT17	AC093827.4
SCAND1	PYCARD	TYMP	KCNT2	TPT1-AS1	LOXL1-AS1	ZNF106	ANKRD65	RETREG1	AVPR2	DSG2	TACC2
FAM32A	GAA	FAP	MIA	ZCCHC2	LINC01503	LRRFIP2	SOX18	HSPE1	PPFIA4	PDE3A	PDK2
DUSP23	GRK3	ASAP3	NR2F1-AS1	CD180	AC105942.1	PDHX	TYW1	PPP1R1A	AL355596.1	TRPT1	TNNT1
ADCY3	MPZL1	IL10RB	RERGL	METTL4	CR1	VDAC1	PTDSS1	FLNC	MACROD2	GYG1	EXOSC9
RNF135	CMKLR1	SLC18B1	AL445426.1	BTN2A2	AL034397.3	CLUH	THSD4	NUDT4	TMEM67	KCNH2	ZNF155
TNC	ZNF552	KIAA1324L	AQP5	DOCK11	ZNF718	MSI2	SH3BP5L	ATPAF1	MTMR3	C15orf41	FAM110A
LGALS9	CFAP36	OGA	CDK3	FBP1	CHROMR	FH	SKIDA1	COX7B	SLCO3A1	ALPK2	KIF1B
TTYH3	NAGLU	BNC2	WFDC2	HPSE	LAMA3	MT1X	ASB8	GPC1	SLC16A7	RNF150	DOP1A
TCF21	KIF3B	ABHD14B	MMP16	SPINT2	PAXIP1-AS2	RB1CC1	MATR3.1	MFN2	LRRC39	HIPK2	KCNS1
TCIRG1	ISM1	SUSD2	SYT1	ARHGAP15	SIGLEC7	PCOLCE2	MYBPC1	PLIN4	NUDT8	C2orf74	KRI1
STAT6	SHMT1	GBP2	IKZF4	SMOC1	HHLA3	BAG3	ZBTB46	SGCD	CXADR	FBXW11	CA3
SESN3	KCNMA1	SH3BP2	EPS8L2	DOK1	AC008759.3	IFNGR1	AVIL	AIFM1	MYOM3	DMD	CBX5
IL7R	UBXN6	TLR4	AC090152.1	RPP25	RUNDC1	ZNF91	TMEM161B	KCNH2	MZF1-AS1	AC023494.1	HIST1H3E
GPX8	C5AR1	SAMHD1	LGALS12	SLC30A7	TDRP	TOGARAM2	CD300E	B4GAT1	MTRNR2L1	HES1	MIEF2
RHOG	TTYH3	CTSF	KCNK15	EFL1	DHODH	PATJ	USP31	GPT	AC116407.1	BTNL9	ETV1
PLEKHO2	SNX30	AOC3	CCDC78	MATN4	AL136295.6	KIF1B	PKIA	YBX3	CYSLTR2	LARGE1	ARNTL
EXT2	ATG12	NXN	C11orf45	EGFL8	EMILIN3	ANO5	PDE4DIP	COQ9	SPTB	RDH13	ZNF614
CEMIP	HDAC3	PCDH18	LINC00899	SASH3	RSPH3	GFOD1	PRKAG2-AS1	HAGH	TIPARP-AS1	SPHKAP	CIAO3
DENND2D	UGDH	IL7R	LINC02193	C12orf75	EFCC1	ECHS1	LAD1	TXLNB	TUBA3D	NDUFV2	UBE3C
GNB4	WIPF1	TRIM38	AC025181.2	LILRB1	CACNA2D2	LYNX1	USP40	ECH1	FMO2	EGLN3	ZNF319
RAB31	GPC6	SAMD11	SLC29A4	SLC1A7	FPR3	EDNRB	RAMP1	RILP	REPS1	GATA4	CALHM6
APMAP	ACBD6	PARP4	ZNF571	WNT11	IL6R	SLC1A3	PCDH7	TANC1	CYP4F3	ADCY6	CDC42SE1
SELPLG	MPG	GFRA1	AF127936.2	SIGLEC8	HAS2-AS1	TMEM116	EMCN	CSRP3	C1orf226	ASB15	SLC16A7
WDR81	CKLF	ANTXR1	DCLK3	ADORA3	IL27RA	AK1	FLNC	DTNA	PLBD1-AS1	RAB9B	F3
NCKAP1L	IRAK1	SLC1A5	DTNB	LAMC3	ZNF793-AS1	CDH13	SLAMF1	NUDT8	MMP15	ETFA	TMEM97
MBP	BAD	EVI2A	SPIN4	TRPM2	AL392172.1	QKI	HSPB8	USP28	FAM169A	MASP1	PIGA
ARHGAP45	SNHG8	C4orf48	ERBB3	HLA-DQA1	B4GALT6	WNK2	APOLD1	SDF2L1	GABRB3	LDHD	ANAPC13
KXD1	PRICKLE2	SLC15A3	SCARNA9	SAMD11	P2RX7	AL627171.2	CMYA5	ABCD3	IMPA2	POPDC3	PRF1
NRK	NFATC4	ADAM17	S100B	DCK	LINC01480	MINDY2	SCHIP1	FDX1	AC009955.2	SMIM4	SYPL2
SFRP4	CHID1	DMXL2	LINC01121	GFRA1	HERC5	STAU2	COX7B	GCOM1	EFNA5	MTLN	TYSND1
LTBR	FEZ1	PLIN3	UBAC2-AS1	SNX20	AC046134.2	KCNH2	MYO18B	SLC6A6	FYB2	GPAT3	ANGEL1
APRT	ADH1C	EPB41L3	AL354811.1	FAIM2	ADCK1	MITF	CIAO3	CHPF	PTGES3L	PPP1R3C	TUT7
EVI2B	LGI2	CEMIP	SEMA3A	RECQL5	CPA3	CLDN12	LMOD3	MTIF3	TMEM116	CMC2	SRRM4
CD2	PDE5A	MAFB	CXCL1	TRAF6	UBOX5	CCND2	ACTC1	S1PR3	AC084036.1	PPP2R3A	DTX3L
RAB5C	KCNE3	SF3A2	C2orf92	AHNAK2	CDKN2B-AS1	EIF1AY	NDUFAF1	PHACTR1	APTR	GOLGA4	SLC27A6
SLAMF8	C1orf162	PTK7	LINC02246	VCAM1	AC005229.4	S1PR1	GATB	CD46	CPTP	TP53INP2	TRBC2
CLMP	LARP6	DPT	TLR6	SLC49A3	ZNF419	FAM189A2	DUSP4	MIR133A1HG	AL357146.1	ATPAF1	COQ3
ARRDC4	LINC00623	PLA2G7	PHYHIP	PRF1	KLHL6	SPHKAP	CLGN	CCT5	LINC02608	GBE1	CAVIN4
NAGK	ALDH16A1	SKI	TPSAB1	NLRP3	PRDM11	UGP2	CLEC1A	NDUFA9	AC020659.1	ANK2	SAMD12
CD48	CAMK2G	CHID1	ZNF551	CLEC10A	GALNT4	GCLM	AL590004.3	SPHKAP	NUDT17	CHCHD3	AC009113.1
PDLIM2	KIAA0930	SELPLG	AP005131.7	S100B	DCLRE1A	TOB1	NARS2	ZNF106	AC018521.5	GNG7	CYSLTR2
LY96	TMEM141	FPR3	TROAP	ZFHX4	PRICKLE3	NRAP	ESRRG	ZNF91	MIR29B2CHG	LINC00844	FKBP3
SLC15A3	SLC16A10	PDGFD	TSPAN10	L3MBTL3	TDRD10	PLCL1	LRATD2	TMEM246	HIGD1B	VDAC2	PPP1R14C
RBM47	SPTSSA	ADAMTSL2	GNA14	ZDHHC1	LINC02208	COL7A1	FAM13C	HACD1	KTN1-AS1	USP28	ALAS1
EVI2A	PIK3R5	UBE2L6	ZFP92	PAQR7	STX11	SLC30A9	NIPSNAP2	HMOX2	SMTNL2	ECHS1	SNAPIN
C11orf24	SCD5	DENND2D	ZNF284	BX284668.5	CBLL1	FKBP3	GREB1L	COX20	LAMA5-AS1	MYO18B	SHQ1
MARVELD1	SPIN1	CYP27A1	AC093627.4	FAM120C	ZNF575	MIR29B2CHG	PAM	ATP1A2	TMEM245	PPFIA4	POLR1B
GPR108	LINC01503	TPST1	AL161785.1	LILRB2	TNFRSF10D	SYPL1	NDUFA4	AKAP1	TUBB4A	PRR34-AS1	MEG9
CDC42EP5	EPB41L3	IGKC	TMEM81	EFNB3	ZNF510	MPC2	C6orf136	NDUFB5	ZNF404	G0S2	SMIM3
MEA1	CD40	CDC42EP5	GFRA2	TTLL1	PCDHGA6	EGF	UQCRB	PSMD6	PATJ	BAG3	TMEM94
CREBL2	GLB1	EHMT2	INHBA	PIGA	TEX10	TAF7	RIF1	NGRN	AL953883.1	GADD45A	IFT74
SNHG9	ARL4C	DSEL	RASGRP1	ART4	BDNF-AS	AC020659.1	PCAT19	ALDOA	AL604028.1	ANO5	RNF26
PIEZO1	AKR1A1	ARSA	PMP2	PTAFR	RTCA-AS1	NDUFA10	CRYAB	FHL2	ZNF763	DBNDD2	HBEGF
MICAL2	MYH10	SESN3	AC060766.4	AL121839.2	CFAP44	LARGE1	ABAT	SH3GLB1	COX4I2	MIR133A1HG	DUSP27
MMP24OS	DPY19L3	PGRMC1	ACADL	P2RY13	EZH2	PDZRN3	ADAM11	PSMD1	AC046134.2	PLCL1	DCAF15
ADAMTS10	CR1	SBNO2	PEG10	NABP1	DCLRE1C	NINL	MRAS	TIMP3	UNC5B-AS1	ACE2	RNMT
DRAM1	PTGER4	PTN	FRAS1	RASL11B	OTULINL	C18orf25	ENTPD2	CLUH	SLC6A8	CTNNA3	PARD6B
MAGED1	CBLN1	ARRDC2	SELP	B3GNT7	NUDT12	DUSP3	P2RY6	SLC16A7	MAOB	MIR3936HG	PPP1R1A
CMTM7	GPR183	FOXP1	AL096701.4	GCC1	POMC	BCKDHB	BLM	TMEM120A	PRR34-AS1	FBXW4	WEE1
RGS10	CCNG2	RNF145	CDK5R1	PTPRJ	FOSB	BIVM	AC026979.2	PSMC1	ZNF805	RCAN2	CYP46A1
IQGAP2	ZC3H4	ARRDC3	AC107068.1	PSPN	ANKRD49	EFNA5	AC007743.1	PSMB6	PRIM1	POMGNT1	DSP
EVL	SLC7A7	LILRB4	KCNQ4	RTL10	GAB3	AQP3	HID1	TMEM245	COQ10A	HOMER2	ZNF2
MYO1F	GPBAR1	KIAA1217	AC004816.2	LINC01138	ZNF222	CEP85	AKAP9	BVES	CA8	NEDD4L	TBC1D19
KCNAB2	C1GALT1C1	EML4	CNKSR2	NCAM2	C12orf76	PARM1	H19	EIF1AX	FAM189A2	AC092353.2	DNAJC11
PILRA	PMS2	TP53INP1	C2orf27A	CWF19L1	METTL8	AC018521.5	MGAM	SNRPN	SEC31B	BCO2	PRAG1
PYGL	SLC9A9	DSE	CEP128	NEK6	ALKBH8	KLHL41	TTC30A	MLYCD	ZNF461	AL159166.1	CCDC122
SYK	MFAP2	FOSL2	POLR3G	RBM12B	RABL2A	PPP1R3C	HECW2	MAGT1	CHST7	PNPLA2	MROH7
CXCL16	CCL19	PTGER4	KCNJ15	KCNE4	MANEA	CTNNA3	LINC01151	PPIF	MCCC1	CPTP	SMIM26
THEMIS2	SLC25A43	HEPH	RAB37	FBLN7	HSD11B2	NUDT8	ZNF550	PSMA2	COA6-AS1	LRRC49	PLCL2
OTOA	SLC39A8	CCN1	CTTNBP2	KCNK15	RAB3C	AK3	SLC2A4	SLC9A3R2	TAF8	PSMC1	GRAMD4
ANTXR1	KIRREL1	MYO10	AL606834.2	TMEM268	GON7	PRXL2A	MYL2	PPP1R16A	SLC25A12	PGM5	SYNE2
EMB	HMGN4	HSBP1L1	GINS1	PSD4	LSMEM1	UBE2QL1	HRC	KIF1BP	ZMYND8	FITM1	AK4
GPSM3	COLEC12	DPYSL3	SPATA1	NKD1	IKZF4	CYP4B1	LRRC3	MGST2	AL356218.2	PDHX	COMMD1
PCED1A	PTGIR	PRR5	ZFHX2-AS1	MUC1	ZC4H2	HAND2-AS1	ST3GAL6-AS1	ADRB1	TM7SF2	PPP1R3A	TMEM116
TRAC	PPP1R18	HLA-DQA1	AC124067.2	L3MBTL4-AS1	CISH	NXPE3	UQCRH	LMAN2	PDE10A	FH	SPN
TRADD	PNPLA6	TCF7L2	GFRA1	OSCAR	KCNA4	TMEM67	PLN	GNG7	SLC38A3	EXOC6B	KLHL18
MEG3	BMPER	AUTS2	AGBL3	TNFAIP8	TBC1D12	B3GALT2	COX6B1	PSMD14	PTGDR2	VLDLR	EMC1
STK17B	BIN1	CLIP3	TMEM79	HHEX	SHISA3	CYP2J2	DHX35	TCP1	AC092428.1	GATD3B	ISG20
FGD3	MOB3A	PCED1A	AC006942.1	AC127502.2	FAM189B	SPX	YOD1	DLK1	HOMER2	FAM155B	SH3BGR
CFB	NUMBL	GALNT10	CCL21	BBC3	SLC38A5	PIP4P2	PLEKHH1	NOL7	FITM1	ACSS2	GPR22
SLC25A39	VAMP8	SMYD3	RAD51B	LIMK2	LINC01094	STK33	AC055822.1	PIP5K1B	SLC14A1	RASD1	KMT2E-AS1
JPT1	CBX6	LIMA1	RNFT2	DOK2	PRH1	IDS	ATP5MPL	FAM162A	AL109615.4	DYNC1LI1	ASMTL
JCHAIN	GNG2	TMEM37	FUT10	FGFBP2	SPA17	MZT2A	ZADH2	HAND2	AP000547.3	SLC30A2	CHGB
FAM167B	GALC	PLAGL1	LMX1B	GALNT4	FGF14	FAM107A	MLIP	TAX1BP1	PEAK3	TUBA3D	JMJD6
SECTM1	PDGFC	CPT1C	AL109628.2	CDKN2A	FAM120C	SEMA3C	ITGA1	CCT7	AC102953.2	C14orf180	GUCY1A2
FKBP11	SREBF1	GIT1	ASIC1	CARD6	ZNF350	DANCR	AC007541.1	JUP	KCNE1	PPFIBP1	C18orf25
IER3	MPEG1	CLSTN3	SGO1	TC2N	TTLL5	RDH5	MYPN	MSRB2	SLC25A23	SNTA1	RBBP9
FAM20C	PTK2B	C1RL	NPB	MEST	LINC00909	RIC3	KIF26A	HIPK2	PDE7A	GJA1	MPP3
CD209	ZNF467	CDC42EP1	ZNF213-AS1	PTGFR	ZNF555	ASPH	PPP1R3D	PIK3R3	LRRFIP2	PPP2R3B	GATA2
TADA3	APOC1	GPIHBP1	AC009021.1	TNFAIP8L3	MCPH1	TMEM120A	TWNK	PPP2CA	FLYWCH2	CADM1	COQ9
CLEC11A	PRKCA	MLLT1	AC005162.3	SCML4	AC005076.1	MAOB	TUBB1	SPCS2	B3GALT2	IDH3A	ACVRL1
CEBPA	FCGR2B	SMAD9	CA1	STEAP1	AL354836.1	SCOC	PAQR9	LDB3	AL596202.1	CORO6	AC018464.1
P3H3	CNP	RUNX2	CLSTN3	AC027601.6	AL022328.4	TPPP	DUSP27	ETV1	IGIP	TMEM246	LRRC2
PLAGL1	UNC93B1	GXYLT2	KATNAL2	WRN	MCM4	MIR1-1HG-AS1	RNF157	PRDX3	DHRS7C	DNAJB5	UBAC1
ASS1	ALOX5	TPBG	FLACC1	SPINT1	USP32	PDHB	ZNF555	GMPR	OAZ3	HSDL2	TRIM73
APBB1IP	VMA21	SPI1	HTR2B	LY75	C5AR2	PIP5K1B	SEC14L5	ISCA1	ZNF790-AS1	WNK2	TSG101
CLN6	PXDC1	SEPTIN8	ITGB7	APBA1	C20orf204	SMCO1	MAPKAPK3	RAMP1	LDHD	APOBEC2	GTF3C1
STXBP2	CDC25B	ROBO1	CIT	SRC	MAMLD1	ADGRF5	SSTR5-AS1	TCEA3	AL117336.2	ARMCX2	UBE2D3-AS1
SKAP2	DDX50	AFAP1	AC108134.2	ABCA7	SHROOM2	GUCY1A2	WNT5B	EPN2	ACSS3	HAND2	ELP3
FRZB	PRMT7	SNHG1	RSPO3	AGA	PDE6B	HOPX	TMEM116	TUBB4B	AC116407.2	LARP6	HSPA2
CD86	MAP7D3	NRP2	LIF	CEMIP	MYLK-AS1	SLMAP	ZNF8	TINAGL1	METTL25	MAOB	GPT
DAPK1	HDDC2	SPATS2	NR2F1	TCP11L1	ZNF587B	IGFBP3	PDLIM1	ENPP4	ECHDC2	ABHD2	FAM71F2
PTPN6	CHRD	SLIT3	ZKSCAN7	SLC25A15	NXPH4	MIPEP	RBM24	PTPN3	DUSP13	ACYP2	MISP3
JDP2	NT5E	KCNMA1	CX3CR1	SLC7A11	AC011477.2	USP2	INKA2	CRNDE	MAMDC4	CD55	FRMD5
GHDC	KIAA0100	TNFRSF10B	MTBP	TMEM39B	PPP1R32	DDX1	TUBE1	HADH	AC103740.1	CXADR	ZNF585A
PI4K2A	MSR1	GALNT5	PDZD4	PARP15	SPATA7	CRYM	GATA3	ATG9A	ANK1	SNRPN	AC013275.1
SIDT2	JPT1	SELENBP1	TACR2	ZNF2	SNX10	UBR3	RGCC	TNNI3	C1GALT1C1L	SMIM10L1	CRADD
SRP72	RNASE6	GLI3	ACAN	ZNF891	AC022098.1	HOMER1	CYSLTR2	PLA2G5	HAND1	DANCR	ZNF667-AS1
PTPRA	DERL2	UNC93B1	CLIC3	GAPLINC	WNT5A	SLC20A2	ASB12	PXDNL	RASL11B	GFPT1	ERBB4
DDAH2	CTHRC1	BACE2	AC048341.2	RINL	FGFBP2	DSC2	PHETA1	LYNX1	TOB1-AS1	TYRP1	CCND2-AS1
FIBIN	RERG	CD37	SLC4A11	AMPD3	LINC00342	TNNI3K	BRWD1	COPS3	ZCCHC18	MTIF3	AC092353.2
SLCO2A1	P3H3	AOAH	AL031775.1	RFWD3	DGKI	STXBP6	ETS2	TECRL	AC002398.2	TPD52L1	FAM110B
ABCA1	TCEAL3	SLAMF8	ZNF492	CASP8	SPATA6	AFF1	STUM	PSMC2	RDH13	MPC2	MED23
IGSF10	PNMA1	OSMR	NHLRC1	FCMR	IPO4	DHRS7C	AC007566.1	ANK3	TPPP3	COPS3	ZNF511
PARP14	SGSH	SH3PXD2A	SLC4A1	AC011484.1	KBTBD11	NCKAP1	FAM227B	ATP11A	EPS8L1	SMIM30	GBA2
IMPDH1	RAB8B	DTX3L	PHOSPHO2	ZNF107	DNM3	GPAT2	TCTEX1D1	SYNM	LRP2BP	KIFAP3	DLG2
NRP2	RHBDD2	PYCR1	SLITRK4	NLGN1	PIK3AP1	CCDC69	DKK3	FGF12	LINC01409	BEX2	PPP2R5B
SLC7A7	LINC00342	IL4R	AC007998.3	NOVA1	B9D2	CDC14B	KIAA0895	ATAD1	Z85996.3	CCL11	AL136171.2
SNHG32	GALNT10	SNED1	LINC01736	NAGPA	C16orf95	PNPT1	NEDD9	PPIL1	CRACR2B	EBP	INHBB
TYMP	CFB	LIMD2	PROK1	NOCT	DYNC1I1	B3GALNT1	DOCK9	RAB21	HJV	TRIM55	PHF20L1
CD180	RASSF4	FMNL3	MIR503HG	SAMSN1	LINC00886	PLPP7	AC007009.1	ERP44	PPT2	SPEG	LCNL1
CNP	ATP7A	TTYH3	AC135050.3	IL2RG	LSR	ADCY5	UBR3	SLMAP	AL591543.1	AIMP2	CBARP
TRBC1	AKR7A2	SUMF1	CCDC163	LINC00968	HRH1	MTUS2	AC005332.3	STRAP	SPIRE2	LAMTOR2	AC090348.1
CNPY2	PHLDA2	RGL1	SEMA4A	PPP1R1B	C9orf64	DPY19L4	CRNDE	CISD1	SOX11	SRPX2	MIR133A1HG
SOAT1	DCXR	SRPX2	FBXO2	TMTC2	SPACA6	NF1	SLC16A7	PPARGC1A	MAFK	ATP6V0E2	"MARCH3"
PKD2	ALPL	ADAMTS10	XKR9	RAB36	ZMYND15	ACAA2	AC018647.2	PDLIM5	CARF	KRT8	NSUN5
TMEM45A	SCIMP	VCAM1	DMGDH	SH3YL1	SRGAP2B	C6orf136	FANCE	SLC30A3	TPO	EPM2A	MYOZ1
ARRDC2	RPP25	BAX	LAMTOR5-AS1	AC004540.1	METAP1D	HIBADH	C1orf53	RHOQ	CDKL3	CDK2AP2	CDC37L1-DT
TBC1D9B	NPPA	TNKS1BP1	AC092944.1	SLC66A1L	USP45	SYNE1	MB	TRDN-AS1	CCDC113	NFS1	ATF1
TP53I11	MAPK14	LAIR1	NAALAD2	AC097534.2	COL24A1	MLYCD	POPDC2	PRADC1	IGF2	SLC22A5	BCKDHB
ATP6V1A	SLC38A5	FAM118A	AP002840.2	ARMC7	FAM162B	TMOD1	LMOD2	DMAC1	ARMCX5-GPRASP2	LINC01405	RBM15
PRR13	SMO	SHFL	AC008946.1	MMRN1	AC132192.2	PGM1	PLEKHM3	TMX4	LINC02175	KLHL41	PXDNL
STARD3	LAIR1	SNX33	TEX41	PCED1B	GALNT12	ADAM23	LDHB	SPPL2A	C9orf116	AL357146.1	CLASP1
P3H4	CALHM2	PTGFR	SIDT1	IKZF3	ZFP64	AQP4	COQ10A	SYNPO2L	BMPR1B	ELOC	ADCY5
HAVCR2	EGFR	CYB561	CHRDL1	WASF1	SLC17A7	CYB5B	TMEM40	CAMTA1	TBX3	LONP1	ABRA
TLR4	GPC3	THEMIS2	AL136169.1	MCM8	SENCR	TBX3	AC068733.3	DGAT1	PLAAT1	USP2	AC145212.1
ARHGAP18	MTHFD1	ADA	SH2D4A	DOCK10	ZNF138	CHRDL2	SLC10A4	NHLRC2	AC126118.1	TIMM50	GRB14
TRPM2	P3H1	FKBP7	CD2	NPW	TRIM14	SLC35F5	DIPK2B	DDX1	AL451165.2	KLHL3	ACOT2
BASP1	TMUB2	CLMP	CRYBB1	SIGLEC7	LINC00997	AKTIP	TAF1A	SORT1	LYRM7	TMEM38A	C1orf53
PLAU	GMFG	SCAMP4	C21orf62-AS1	THG1L	SLC25A19	LMBRD1	CDC42EP2	IFI27	CLIP4	SLK	UPP1
SMIM25	TBC1D2B	RNF122	BDKRB1	MROH6	KIF27	BOLA3	CENPJ	ST3GAL6	KDR	RNF139	AC009779.2
UBTD1	VPS41	POFUT2	AL121672.3	EPS8L2	ZFP1	NKX2-5	CCDC9	IDH3B	ADRA1B	PLCL2	POLR2D
NAIP	SDHAF1	LILRB5	SMN2	LINGO1	BEND6	NDUFAF4	BCAP29	MDH1	GPR135	SLC27A6	RPF1
IRF8	CCN3	ALDH1L2	KLHL29	MFSD2A	SLC41A2	PLCXD3	KCNJ8	GATA4	AC007325.4	TUBA8	LINC00641
CD84	ZNF671	JDP2	KMT2E-AS1	TIAM1	TMEM154	AIFM1	PPM1K	PATJ	PPP1R13L	ZNF91	YAF2
FMO3	AIF1L	ZNF436	GOLGA8N	MZB1	DLEU2	TMEM38B	EGLN3	PCOLCE2	DGKI	IDI2-AS1	TARSL2
ICAM1	PHGDH	TSPAN5	RELL2	LINC00205	ACADL	NPTXR	THAP2	UNC45B	CCSER1	BCL7A	MOV10L1
ARHGEF1	PGM2L1	SHF	ZBTB39	CTLA4	AC004812.2	HOOK2	F5	TRDN	ASB11	FILIP1	MACROD1
GNPTG	ITGA3	DPYD	AC005840.2	SRGAP3	PCDHB5	ABCC5	FLG-AS1	TIMM10	F5	SLC20A2	GPATCH3
ARHGAP30	DOK2	ALDH18A1	GPR35	ALG6	TOP1MT	RAB21	KLHL9	NDUFA1	ALG10B	PDE7A	AC117453.1
OPN3	ETV5	BOK	AC022306.2	DNAJC5B	CBX8	TCF15	NUP160	GPAT3	ACACB	ACOT13	TLNRD1
PARP8	CNTLN	RSRP1	ATP6V0E2-AS1	FCRL5	UBAP1L	MACROD1	DACH1	CORIN	ASB15	AC008443.5	LATS2
TMUB2	ABCA6	BMF	AP002495.1	SLC17A7	AC008966.1	RORB	CD99L2	NDUFS3	GATA4	TSPAN18	ZNF287
CD3E	VPS26B	PCGF3	ZKSCAN4	DYNC2H1	PGBD1	OSGIN1	TNFAIP8L1	CPTP	PYGM	ITGB1BP2	IDH3B
GPC6	SFT2D2	NEURL2	AL139099.1	CD200R1	PAOX	CCDC85C	ZNF48	MARK3	LINC01929	SLC12A7	VTN
LILRB2	DOCK8	SMO	FBXO36	A1BG-AS1	MALINC1	FAM210A	GPD1L	MAOB	PTCHD4	SLC41A1	DHX32
TBC1D2B	LILRB5	PIK3AP1	MIR3945HG	SCN9A	GPER1	AL670729.3	CDH5	ADAM23	ZBTB46	TNFRSF12A	AC004918.1
PLA2G2A	HPS1	KDELR3	NALCN	PKNOX2	VNN1	TMEM161B-AS1	AQP4	PRKACA	AC068700.1	JPH2	SCAF4
CLIP3	SOX4	PARP8	KIF18A	ZNF70	ZBTB7C	PPP2R3A	CAV3	COPS5	MYOZ3	CCDC9B	PMM1
"MARCH1"	EMILIN2	KIAA0930	GABRR2	DBF4	KLHL29	SREBF2	LINC02062	NQO1	COMTD1	RBFOX1	CD3E
ABHD14B	OLFML1	TNFRSF4	AC009107.2	IGHM	WDR92	CLCN3	AL513487.1	BZW2	LYPLAL1	FBN2	FAM3A
LFNG	STAT5A	DOK2	AL157392.3	CD3D	RPRML	DNAJC19	GCNT2	GLRX3	VEPH1	AC020659.1	HK2
SNHG19	KCNAB1	RARA	KCNJ14	MATK	AC127537.1	IDH3B	LINC00893	NDUFS7	NRG2	ALDH5A1	KBTBD4
MCUB	CHRDL1	FAAP100	HTR2A	GALNT6	ZFHX4	TMEM100	TTYH1	NDUFAF4	IVD	SLC2A12	KIAA0895L
GSDMD	ANKRD13A	GHDC	MYLK4	KIAA1614	CDKN2A	ANKRD26	TRAPPC9	ALPK2	AC018553.1	CACNA2D1	SPTB
SART1	RGL1	ARMC9	AC006230.1	NUDT11	ZNF35	PPP1R13L	UNC45B	UBE2B	FASTKD1	HOOK2	SLC2A11
LDLRAP1	ERCC8	CCR1	AC099518.5	PRIM1	ZKSCAN4	MPHOSPH9	TTC28-AS1	PAQR9	RLN1	GYS1	ZEB1-AS1
ARRDC3	MYLK	RTP4	CBX8	EPHB6	ZDHHC13	CD46	AL670729.3	TFPI2	SLC26A9	NOL3	NCALD
GGA2	EEF2KMT	ZNF783	AC139795.3	TRAF1	AVPR1A	LINC00881	GLMN	SPRYD3	ITGB6	PDE1C	COA5
C5AR1	PCDHB4	ITGA4	AP000695.2	SLX4IP	PWP2	TSPAN12	XRN2	TOM1L2	TMEM68	CYP4B1	SCN2B
SGPL1	LYST	OLFML1	SV2A	LINC00324	TEFM	TSPYL1	COX7A1	LRPPRC	TBX5	AKAP1	UNC5B-AS1
THBS3	IFNAR2	CD84	PABPC4L	AC104530.1	AL158152.1	DGLUCY	AC012358.3	PPP1R9A	HS6ST3	ISCA2	PPFIA4
GPX7	CLEC4G	RNASET2	EVC	WDR47	SCN9A	PHACTR1	ASB2	LMOD2	ASF1A	ITGA6	LYRM4
MMD	UNC5B	PAPLN	ICAM5	ZMYM1	NFE2L3	ACADSB	MAN2A2	MAP7D1	REM1	ILDR2	LINC01719
HOMER3	HAPLN3	SMAD1	CA12	CDC7	ZNF184	ASIP	AGAP2	PGM5	FAM81B	AC100756.4	ATXN1L
FYB1	LINC02802	ST6GALNAC6	TET1	PCDHB6	MEG8	ADAL	VTN	WNK2	SCHIP1	LOXL2	ZNF433
PHETA2	TMEM119	GLIS2	COL28A1	PROSER2	CABP1	IDH3A	AC024610.2	POLDIP2	MKLN1-AS	BTBD10	AL031666.1
TMEM37	ATP8B1	NLGN2	AGAP5	SLC9B2	NPIPA3	KIAA0232	HBB	ACTR1A	SKAP1	C11orf21	LSM5
NAGA	CCDC115	AL137186.2	DNHD1	IKZF2	AC026471.4	BHLHE40	GOT1	TMED5	LRRC73	SHISA4	VAV2
UPK3BL1	PRRX2	GPCPD1	CXCL8	LINC02611	TWNK	TMED7	RSKR	DNAJA4	GCAT	FRMD3	PLEKHA5
IGLC1	POLR2G	TRIP10	TNKS2-AS1	EMID1	LRRC8C-DT	PPM1L	ATP8A1	MLEC	TMEM52	VWA1	MYLIP
GZMA	CD200R1	MAPK10	AP001062.1	C1QTNF12	AC110285.2	VPS13D	NFRKB	PCCB	GRIN3A	HSPA4	KCNJ4
CPNE1	MRVI1	HACD3	AC080013.1	SIGLEC9	ZFP28	KCTD9	BTNL9	ADCY6	VSTM2L	SLC25A23	CRYBG1
SLC36A1	CXCL9	ZNF217	ATP8B3	LRRC29	NAALADL2	KLHL7	MT1A	NEDD4L	ZNF454	HABP4	CLPX
SNTB2	PLEKHA4	MTSS2	SLAMF9	AC009275.1	DNAJC25	ABHD2	IER3IP1	BAG1	DOCK6	DIPK1C	KIF22
BIN2	SLITRK4	PIK3IP1	IGSF10	ACKR4	ZNF23	PSME4	AL162377.1	BMERB1	PITX3	SGCD	FRMD4A
DOCK2	TNKS	NFYB	DDX11-AS1	PNMA2	MCM8	POMGNT1	WNK1	LAMTOR5	JPH2	MYEF2	CDKN2AIPNL
MAST3	LINC00632	P3H4	AC096586.1	PSD	GPR17	AL359715.3	MINDY3	NUDT22	C5orf58	NBEA	PYCR3
RGS2	KCNIP3	ALDH1A3	EDRF1-DT	AC145207.5	AC018529.1	ALPK2	CHCHD7	KIF21A	AC091978.1	IP6K3	INKA2-AS1
SUMF2	VASH1	SLC2A10	RFPL1S	M1AP	ZDHHC15	KCNJ2	LINC02587	GATA6	PIK3CB	ART3	SRGAP3
ACE2	LPIN2	SLC16A3	HUNK	CRACR2A	CLCN2	DELE1	NRF1	FABP3	KRBOX1	GADD45G	ARFGEF3
MYO5A	PCSK6	MANBA	RSPH9	AL592148.3	GSEC	TMEM106B	TRDN-AS1	UBE2QL1	TMEM143	AC018521.5	MYO9A
IKZF1	FOXC1	RELB	PMAIP1	ZDHHC13	MMP1	SCN2B	LINC01844	OPLAH	RHOBTB2	PTGFRN	KDM4C
ARL4C	CPNE1	PLAU	PTPRT	OLFM2	APOBR	ECI2	CRACR2A	RILPL1	SLC9A5	CACNA1C	ZNF626
BSCL2	EDEM3	TSPAN6	CAMK2N2	PCDHGA6	FGFR3	CAND2	NDRG4	MAP2K1	LINC02256	LINC01128	MAPK8IP3
IGLC2	HMGCL	STON1	ADIRF-AS1	DLG5-AS1	BTBD19	UBE2O	ELF4	PERM1	SYTL1	PPIF	BIRC3
MGAT2	FOXC2	LTB	SHC3	DNASE1L3	PLD4	ISOC1	AC018521.5	GLRB	ZNF436-AS1	REEP1	ZBED8
SUMF1	PQBP1	MIR100HG	E2F8	LINC02615	GPSM2	ALS2CL	FUT1	GABARAPL1	AMIGO1	DNAJC19	GADD45A
PSMB8	PTPN6	UGDH	AC004988.1	RAPGEFL1	AP001330.4	COQ3	C10orf71-AS1	BDH1	CLIC6	SETD3	POPDC3
VASN	NPY1R	PSMB9	MAEL	ADTRP	AP000254.2	MYADML2	SYPL1	VSNL1	LINC00622	HYAL1	TMEM178B
ARHGAP25	NXT2	CXCL16	DNASE1L3	TRMT12	ARSI	AC083843.3	DVL1	AGT	LSMEM2	ABRA	AKAP1
LST1	SFXN3	VAMP8	VXN	CCDC137	CEP41	EPDR1	SLC29A1	KIF22	AC026304.1	AC147651.1	UBXN2A
RIN3	YIF1B	SEMA6B	SKA3	IGHA2	FXYD2	ANKRD33B	SGSM1	CCND2	AL122035.2	PCNT	PDK1
SH3GL1	CGNL1	UGCG	AC016773.1	COL9A3	AC239809.3	ASB8	PAQR3	FKBP3	CIB2	HEBP2	NUBPL
SIPA1	RPE	FRMD4B	IL21R	BHLHE22	CADM3	XPR1	SEMA6C	PSMD12	PPTC7	OSBPL1A	SMPD2
INPP5D	TBXAS1	RARRES1	CLECL1	LIPT2	ZNF568	GCAT	TOE1	GADD45GIP1	AC009509.4	RAB4A	UBR3
BAG4	LETMD1	PCSK5	ZMYND12	ZIK1	LRP2BP	MLPH	SLC16A6	COBL	ITPKA	PDZRN3	BAG5
YIF1B	TBL2	MDFI	PRNCR1	AL845472.1	NLRP3	AC093827.4	UEVLD	RETSAT	SOX9-AS1	COA8	MTHFS
SPOCK2	NLRP3	APOL2	AC105446.1	LINC01943	PRNCR1	KIF21A	KRBA2	CAP2	NME5	KLHDC8B	RPAP1
PPP1R10	PIK3IP1	LINC00963	SIGLEC15	FAM225B	BORCS5	FBXL17	PAXIP1-AS1	DNAJC19	LINC02550	CFAP61	C6orf136
PLSCR1	SNRNP200	COLEC12	AC110285.2	DPEP1	SEMA7A	ANXA3	PGBD5	NDUFAF5	COLQ	FHOD3	TANC1
ZNF524	RBM42	PPP1R18	CCDC189	TIGD1	DBR1	WNT11	COX17	SMIM26	SMIM2-AS1	FNDC1	ACSS1
C1QTNF6	CYB5R2	SULT1A1	COL25A1	PPM1N	CENPM	FRK	APLN	BCKDHA	LINC01505	ASB10	COG3
SEPHS2	DGKA	AGPAT4	ATP2A1-AS1	NEMP1	OXT	LCLAT1	AC022784.1	AP1S2	EIF3J-DT	COQ8A	ZNF250
NREP	CFP	CCDC102B	TNK1	CD28	NEK11	PNISR	ZCCHC4	C19orf47	AL583785.1	ACBD5	AL391684.1
PRAF2	PPP1R14A	CALHM2	AC016831.1	AC015871.4	PRR15	EYA4	AC004803.1	ST6GAL1	AC007009.1	COLQ	SCML1
SHB	NCKAP1L	BTN3A3	LINC00562	SPICE1	FKBP1B	CPLX3	MLF1	VCL	EXOC6B	C10orf71	ZAP70
CTIF	FKBP11	GPR162	SCGN	RAB42	ARHGAP5-AS1	LINC01719	PRPF4	G0S2	ALDH1L1-AS2	ADCY5	PNPLA4
PARVG	PRG4	FES	C16orf89	LINC00839	AC068587.4	VWC2	TNNT2	TNXB	AQP11	PATJ	ALPK2
LRRC25	SRD5A1	BCAT1	AL355512.1	MRO	AC018755.4	TMEM65	AL683813.1	PTGES2	LINC02785	DCUN1D5	FASTKD1
PGLS	CHI3L2	EPHB3	AL121944.1	GJC2	MALT1	SLC27A6	CNOT4	SREBF2	MARK1	CDH13	ESRRG
TPBG	TCF21	DBN1	FFAR2	CXCR6	AC000403.1	MTHFR	ZNF17	RNF167	CRY2	PSMD14	KIF13B
IGHA1	MARVELD1	NSG1	TRIM50	AC074117.1	CHAF1B	EMCN	PFKM	UBAC1	GALNT16	ASB8	ATMIN
DDIT3	STS	HDAC10	CEACAM3	ZNF208	ZNF587	PPARGC1B	MROH7	TMEM9B	AC002456.1	TARS	ZNF213
FRMD8	CXCL16	ZFP90	LANCL3	ZNF546	CEP76	DNAJB9	OSMR-AS1	REEP5	RFESD	RNF208	BNIP3
BMP4	GRK2	TRAM2	ZNF773	ADGRE2	AL596244.1	C3orf33	AC092828.1	COQ10A	C16orf87	GABPB2	DNAJC27-AS1
PIP4K2A	SDSL	SCD	AC009961.1	CEACAM21	TTC30A	UBAC1	CDK18	HSPA13	CBLN3	MLLT3	HIST2H2BE
MERTK	SGSM3	HAPLN3	CARD11	PCLAF	RELT	HAND2	MLPH	HSPB2	ZNF772	TLCD4	HELB
HCK	DYNC2H1	ZNF516	ZNF750	SIX2	FAM66C	PPP1R1A	AAK1	DOK7	C8orf88	TESC	DMWD
IRF5	OLFML2B	DACT1	LINC00921	IRAK1BP1	EFCAB7	NHLRC2	CCDC58	KIFAP3	RAG1	EPB41L4B	NDUFAF1
CD2BP2	IDH1	ORAI2	AL359711.2	C1orf109	IL20RA	DOCK3	ERMP1	OTUD6B-AS1	NBPF15	PEX13	ZNF273
MTSS1	MS4A7	PGM3	MUSK	LCA5	GRAP2	AL031058.1	BOLA3-AS1	TIMM21	BRICD5	C3orf18	MAP3K11
MED16	CYP27A1	PLA2R1	AL359397.2	NMNAT2	LMX1B	ZNF720	ATP5ME	PPFIBP1	PPP1R3G	BVES	ZNF550
SLC25A1	RGS2	TNFRSF25	MIR222HG	AC083843.3	SELL	RAB6B	SMIM1	SEC11C	LARGE2	CTXND1	KCNMB3
SLC43A2	ACTG2	CADPS2	AC009974.1	SENP1	AC019080.1	PCNX4	FAM222A	TESC	HPN	RBP7	IGHMBP2
POLR3GL	ANKRD13D	FAM111A	PMFBP1	TREM1	LINC00900	ECSIT	AC097382.3	CAND2	PLD2	STK33	EXOC6B
CRELD2	MIS18BP1	FZD2	SYT12	AL445524.1	SYP	PCNT	SLC25A27	PTGES3L	POLB	ZNRF1	AC021054.1
SPNS1	AKT3	CYB561A3	DLEU7	MCOLN3	LINC01915	ZFYVE16	DONSON	ICA1	AC013724.1	UBE2QL1	SRPK3
ATP8B4	COMMD9	SLC66A3	AKR1E2	TNFSF14	MYRIP	KIDINS220	SLC30A4	NAV1	LINC01048	ATAD1	PDIK1L
GBA	SUSD5	SULT1C4	IL17RE	ANKDD1A	C18orf54	GPT	SEMA4B	BTBD1	FAM117B	EPRS	CA4
CABLES1	RPUSD4	LPCAT1	CCDC138	ZNF599	ZNF616	ANK1	IFI27	ERBB2	AC137630.3	DMPK	CBLB
CHD3	WDR81	MSX2	SOX8	BLNK	FGFR2	DIRAS1	CLHC1	ACYP2	ASPRV1	F8	LINC00654
LILRB4	PPP2R5D	LETMD1	PAK3	AGAP2-AS1	ZNF300	TIMM21	CEACAM8	PRR34-AS1	SRP14-AS1	ZNF330	EVI5L
RCC1	GGA2	PRKD3	AC009996.1	IKBKE	AC016727.1	DAND5	C3orf62	VBP1	CCDC84	AC020909.2	MTIF2
LINC01503	DTD2	KCNE3	LAG3	ZNF709	ZNF20	ZYG11B	HPR	VLDLR	C10orf71-AS1	PTPN3	RORC
VASH1	E4F1	BCL3	UBXN10	NCK1-DT	ENTPD7	LINC02269	FIGNL1	SGCG	CCDC24	WIPI1	CAP2
KIF3C	CMTR2	EFHC1	SEC24B-AS1	AC021097.2	LUCAT1	AK4	ABO	ECHS1	PSMB8-AS1	PTPN21	FGFBP3
RBCK1	SNX33	CRISPLD1	WARS2-AS1	ATAD2B	SNX20	ACOT9	DECR1	DMAC2	RHBDL2	DPY19L4	BTBD9
PSMB9	CARMN	LINC01503	ZNF239	MMP17	CDK2	PROX1	C3orf52	ACACB	FGFR1OP	PERM1	IFRD1
CLDN15	SLC15A4	PRPS2	KCNF1	FSBP	LZTS1	NBEA	TSR1	PARM1	NPIPB4	BNIP3	USP24
PPM1F	COL8A2	NFKBIZ	CEP72	CD3G	AL136295.7	CHCHD3	"MARCH5"	KCNK1	LINC01341	MTRNR2L11	FEM1B
EEF2K	AC005165.1	ELP2	CLEC4D	AL133243.3	MYO7A	FYCO1	EPHA2	MEF2A	SLC27A6	HIGD1B	ZMAT1
AC092069.1	MRE11	CD200	LGR6	ETV2	TK1	ZNF844	SLC15A2	PDCD5	AC100858.3	CEBPG	TNFAIP8L3
RAB32	PIP4K2A	RHOU	AC007038.2	TLR8	UBA6-AS1	HACD1	LRP2BP	XPR1	FIGN	HAPLN1	UVRAG
ZNF703	WDR54	IRAK3	CDK20	ZNF816	VAV3	IVD	SAMD4A	PA2G4	USP37	PLCE1	BSDC1
B3GAT3	ALDH1L2	COLQ	KCND1	PSMG3-AS1	FAM24B	FAIM2	COX6C	CES2	RAP1GAP2	AL023553.1	AP001505.1
PTAFR	TMEM37	BET1L	AC005070.3	TEC	KLHL35	FAM3C	BCO2	CDH13	STOX1	PLA2G4C	STK33
AC132217.1	NDST1	ANKRD6	ASPHD1	EPOP	ESCO1	PFKP	BTAF1	CCDC141	AL353593.1	RHOT1	GPAT3
TMIGD3	DDAH2	LSAMP	NEIL3	VAV3	LCMT2	FAM160A1	NKX2-5	FRY	CCDC85A	SGPP2	SH3GL2
CKLF	ABHD14B	SRC	ERCC6L	EZH2	EYA2	LYRM7	CXXC4	CHMP4B	C5orf46	TNC	UBE3B
DOK2	IGKC	WDR46	HIST2H3PS2	SPATA5	SHISAL1	FRMD3	PTGDS	IPO7	AC135012.1	RAB6B	ZNF814
PLIN3	PSEN1	RGS4	AC026356.1	AL158071.4	NHLRC1	LINP1	CH25H	CFL2	MALINC1	AL451069.1	HINT3
RNF166	SNHG1	SNTB2	GDPD3	AL662844.4	ID2-AS1	KCNJ12	ANKRD1	EIF5B	GTF2H2	AL136171.2	DNALI1
TNFRSF1B	ABTB1	AMDHD2	ACTL10	CD163L1	AP000866.1	MLH1	AC068473.5	ROGDI	PTGER3	AGL	PANK4
TNFAIP8	IMPDH1	AMOTL2	VAMP1	AC002070.1	KIF5C	CSRNP3	IGDCC4	TMEM126A	KBTBD13	NRTN	WASHC4
FERMT3	PARP11	SYNRG	HLA-DRB5	NAALAD2	ZMYM1	AC100803.4	SMCO4	SGCB	IQCJ-SCHIP1	LINC02762	FLYWCH1
CYTH4	OLFML2A	CHST1	BX537318.1	LINC01426	SIX2	ASB2	TPD52L1	CLCN3	LINC01704	MAPK8IP3	FAM217B
HDAC1	PTPN2	CDO1	LRRC10B	ZNF234	ZNF223	CPTP	SMIM4	PSMD7	MTRNR2L4	DNAJC15	ACTL6A
ZNF503	FNDC10	PARP10	LINC00893	ABCG2	GLB1L	LINC02502	CCNQ	KCNJ8	TKTL1	DGLUCY	CNTROB
ANGPT1	IGHG2	UBTD2	PCDHGC3	AL691447.2	TAF1B	LINC01128	ITGAV	CDK18	ESRRG	PCDHB15	SLC2A5
PIK3IP1	PTTG1	ATP8B2	AC036108.3	LINC00997	CCDC88C	LANCL1	AC010976.2	ZFR	TSPAN32	CST2	CKAP2
BX284668.5	IGFLR1	HLA-DOA	ODC1-DT	PCDHB9	CEP135	TKTL1	CTU2	KCNQ1	AC004908.3	APBB1	TAF2
EIF4EBP3	CCNK	UBE2Q2	AC019080.1	AC108075.1	ZNF674-AS1	LINC02822	PPP1R3C	POLR2B	DSCAS	TCF15	AC079848.1
GAS1	RAB27A	DOCK2	AL133520.1	SKAP1	MOCOS	RAP1GAP2	LRRC20	GLRX	AL390198.1	DMTN	PDZD2
PREX1	MT1F	TBX18	AL031595.3	BATF	TBX19	COBL	RPIA	ALDH2	AL731569.1	CA8	ZBTB39
NCF2	GK5	NKAPD1	SLC25A5-AS1	ZNF718	NPIPA2	PCLO	GSTM3	ITFG1	FOXO3B	STBD1	VIPR1
HS3ST2	AC004889.1	AL162458.1	AL445250.1	RBM43	AC002546.1	AGL	AL356599.1	CALCOCO2	DLGAP1-AS2	NT5C3A	ATP6V1D
BAZ1A	BX284668.5	CXCR4	AC105219.1	MAP1LC3B2	C8orf31	MYO18A	CEP95	HES4	AP1S3	AL356218.2	ISOC1
FHL3	FBXO21	CLEC2D	AC079610.1	GPR150	HS3ST3B1	PPP4R2	KIF17	AAK1	MLPH	ESRRG	BX640514.1
BMP1	BET1L	TNRC18	LINC00526	PRSS36	NRXN3	CHL1-AS2	KLHL31	GALNT16	ALDH5A1	AC051618.1	SHTN1
AC020909.2	ARAP1	IQSEC3	ZNF726	AC116913.1	SRCIN1	OSCP1	TRIM54	SMTNL2	AC004825.2	GPR22	HIVEP1
SF3A2	HARS	STXBP5	AC021092.1	AC107294.2	NRL	PKDCC	PACSIN1	LMO7	AC008280.3	SCN1B	USP28
RAC2	SRGAP1	RBM47	AL157394.3	PDCD1LG2	TFEC	CBLB	AQP1	TMEM38B	AC110611.2	DTWD2	RAB4B
OGFRL1	RHBDF1	PENK	AC106707.1	WRAP53	NHLRC4	SLC25A34	BRCA1	AHNAK2	F2RL1	NDUFAF4	CCDC85C
BACE2	GLT8D2	LDOC1	SOWAHD	ZNF749	APTR	SLC47A1	HYLS1	PALMD	EID3	PLIN5	RASAL2-AS1
PCGF2	DBP	FNBP1	AL359555.4	FAM83H	MSH5	SCRN3	AC083862.3	SEMA3C	AC018413.1	AIFM1	DUSP26
APOL3	VASN	CD3E	RBP4	SASS6	PLEKHA8	FSD1L	AL158212.3	PLAAT3	SLC26A4	PAM16	PBLD
PTPN18	FNDC4	PIEZO1	AL031651.2	CYB5RL	FLVCR2	ABCB6	MYLK3	CUL4A	AC018638.6	JPH1	ZNF836
NANS	MMP14	LINC02544	ZNF711	PCSK4	LINC00923	ZNF302	AC025048.2	EBP	TYRP1	MAPK4	ACBD3
RUNX3	RASGEF1B	TGIF1	AC015712.1	NSUN6	CD38	C11orf21	IDI2-AS1	NDUFB11	AC012360.3	APPL1	GRAP
STK4	APBB1IP	TRAF5	PDE6B	ZNF700	AL035587.2	AURKA	ZFP30	PINK1	IL12A	METAP1	NPTX2
NF2	GPR180	INPP5D	MMP7	ANKS1B	LINC02388	ZNF385B	UBE2G1	SCAMP3	SLC35F2	MTIF2	BRAF
SH3BP1	DOCK2	TRBC1	TEPP	ASPRV1	ZNF16	CACNA1C	CYB5D1	HSD17B10	AC010359.3	PVR	ATPSCKMT
EMILIN2	ZDHHC7	PALM	BEX5	DOK3	ZSWIM5	KY	ATPAF1	GBE1	ACAD10	NACC2	C5orf63
TRAF5	ARHGEF10	NTAN1	MIF-AS1	COLCA1	SLFN12	MAN2A2	AC138649.1	MTRNR2L3	AVPR1A	CREB5	IL17RC
CDC25B	PLCB1	SRGAP2	PLPPR4	WT1	NFKBID	PAIP2B	COQ9	GRAMD1B	DAND5	STRADB	AP002360.1
DGUOK	PTPRO	LUC7L	MSI1	GREM1	BDKRB2	TMEM231	PCNX4	PGP	ZNF225	PPP2R2A	MAD2L1BP
GPR183	DOCK4	TMEM98	DHH	INKA1	KHDC1	LTN1	PEX11G	SLC49A4	NR6A1	LCN6	PLCXD2
IL18	KCNMB1	EDC3	PLS1	HOXB4	SWSAP1	FNIP2	CLEC14A	MLF1	PPP1R13B	MTUS2	ST6GAL2
ZNF598	FUZ	PLPPR2	CCL28	CHEK1	TIPARP-AS1	SMIM30	PCP4	PDK1	CHODL	ZBTB9	ZNF471
TP53	RSRC1	TRO	AL356056.2	KL	CIT	CECR2	FAM229B	STOML2	CACNB2	AL451165.2	MTRF1
LPAR1	L1CAM	NET1	C1QTNF9B	DLEU7	AC108488.3	ATP11A	DEPDC5	LINC00881	RAMP2-AS1	PGP	ABCB4
GBP2	STIM1	DPM2	LEFTY2	ITK	RUNX3	AL031595.3	ZNF281	CHCHD1	FAM215B	SH2D3C	AC009549.1
F2RL3	CHFR	CDC25B	LINC01415	GRID1	LOH12CR2	SHPRH	SLAIN2	MYOT	AL035078.1	NEU3	ASAH2B
THY1	NPIPA1	TCF3	BNIPL	ZNF484	HLA-DQB2	TMEM126A	DEFA3	DUSP26	CPNE5	SOX9-AS1	SMG1
PIK3AP1	RANBP3	ADAMTSL1	TFAP2A	ELMO3	AC025171.2	ZNF629	CLCN4	STRN	GPR157	CDK18	ANO5
DCAF7	LGALS9	ASMTL	RHBDL3	HSD17B1	CKMT2-AS1	PHYH	SYDE2	PLEKHA7	PAIP2B	MTRNR2L3	STRADB
FPR3	PODXL2	IDUA	LINC01354	NRXN1	AC026748.3	DMKN	ANK3	BANF1	UGT2B4	NDUFAF5	AC087457.1
MINDY4	SNX19	FYB1	MEX3A	AC243829.4	TVP23A	GNMT	VPS26C	LTBP1	NSUN6	PPP1R1C	MANEAL
COLEC11	VPS13B-DT	FAM43A	FOXD3-AS1	AC093627.4	CCDC85A	SLC30A3	RERE	UBQLN1	SMIM1	EMCN	PDE1C
DOCK11	MDC1	POU2F2	AC004540.1	KCNC3	NLGN3	KCND3	MAP3K14	HAX1	NFS1	CRADD	MGMT
MPP1	FCN1	CLK2	MEF2C-AS1	LINC01871	CHRNA3	GCOM1	ADRA1B	EYA4	SLPI	UCHL3	AL135925.1
COMP	GNAL	ETNK1	TNFRSF10C	RSPO3	RORB	RANBP2	CAHM	EMC3	DMRTA1	ALAD	LYSMD2
ATP10D	ZNF865	MAP3K8	SLC16A9	GRIN2C	ZNF823	MLLT11	BPI	ITGA9	MGAT3	MAST4	CHADL
ITGA4	SAA1	SLFN5	TRIM62	RHPN1	AL139393.3	STC1	NEDD4L	EFNA5	GNAO1	MELTF	SLC45A4
NOL9	AL365203.2	DPEP2	DPF1	EFCAB11	RNFT1-DT	PPP2R3B	BTBD8	GNPAT	ATP6V1FNB	CAVIN4	AL159166.1
CHCHD6	NCKIPSD	CNRIP1	AC091132.4	TMEM81	ATP6V0E2-AS1	SIPA1L2	CXCR2	HEY2	FAM185A	FBXL22	TBX5
AFAP1	FAM172A	LINC01089	CTSV	CYB5R2	AC012615.1	COQ9	TNNC1	ACOX1	MTRF1	DMAC2	EOMES
SNAP29	LSAMP	HS3ST2	MIR9-3HG	KRT7	UBE2L5	ERBB4	FAM162A	DDX24	AC021134.1	LCN10	OSBP
CSF3R	MMS22L	KIF26B	AC139099.2	RELN	KDM8	AC007325.4	SNHG4	ANK2	AC087477.2	UBR3	GUCY1B1
FAM20A	SLC12A9	ADPGK	AL513548.1	ZNF525	HIST1H2AE	PGR	AL021392.1	MANF	TMEM246	FSD2	DHRS11
FES	SHPK	CD48	AC120053.1	DSCC1	SVOP	BDP1	SLC39A14	BUD23	TATDN3	KANK1	PWWP3B
KDELR3	NCF4	NFIL3	TDRD1	SV2A		SLC19A2	ALPK2	LRP12	TFB1M	VWA8	LRIG1
BET1L	CTBS	MAN2A1	LINC02207	PTGES		TASP1	FILIP1	DERL1	ZNF684	ETNPPL	AIF1L
ZNF581	NPPB	C1orf162	POLR2J2	SYT12		PER3	DLX5	SSBP1	AL139089.1	SYNJ2BP	SYNJ2
CYBC1	ANGPT1	NCAM2	AC079915.1	STK32B		EPN3	EPN2	ALDH3A2	SLC22A5	LGALS8	SIPA1L2
ORAI1	MYO1E	SV2B	ADAT3	CYTL1		REEP1	EIF1B-AS1	CD58	GABBR2	NUDT16L1	RTN4IP1
AC010642.2	ZNF428	FAS	AP003392.3	SOX8		PPP1R9A	NEAT1	DYNC1LI1	EXTL1	DYNC1I1	ADSSL1
CASP4	PRCD	PTPRC	EPHA5	TMCC2		APLN	INTU	ANXA3	TRIM16L	C5orf46	RBM12B
PLAAT4	HLA-DQA1	KMT2B	DYNLRB2	ZNF430		C19orf47	CRPPA	GLO1	ZSCAN16	SATB1	SUCO
CASP2	TBC1D16	NSMF	AL356481.1	LMX1B		USP28	TEFM	TMEM65	AC002310.1	QPCT	ZNF341
CLEC10A	HIST2H2AC	S1PR2	CMA1	ATP7B		STBD1	IRAK4	STBD1	CMTM2	LINC01954	MYL5
RAB8A	CLN3	RASA3	WNK3	BNC2-AS1		LINC00641	MALAT1	HSD17B12	SIRT5	TMEM223	CCS
CYP27A1	PPP2R5B	ZNF521	AC103691.1	WARS2-AS1		USF3	PLEKHJ1	AC018521.5	LINC00662	SEPHS2	NKIRAS1
BICC1	PSD4	DIO3OS	AL118558.3	UFSP1		TUBA3D	CPLX3	SMDT1	AC130343.2	SEZ6L	SLC33A1
BMP6	COMMD5	HACD4	CA3	LINC01816		ACOX2	PCDH19	HOPX	CCDC183	TMEM116	ARHGAP9
DIPK2B	CD86	SH3TC1	PMM2	ZNF786		CIPC	TTC39A	CDK16	MMP25	KLHL30	CENPU
CCN4	HMCN1	PLEKHG2	AL357054.4	ZNF606		TM2D3	COX7C	ABCC5	MCU	PTGR2	ABCC10
ISYNA1	GPAM	EFS	ZNF215	LAMA1		SCAPER	CFAP58	CRLS1	CNFN	FAM92A	MUTYH
PDE1A	LYRM4	ANGPT1	SLC16A11	CORO2A		MAL	SRP14-AS1	AL031058.1	ZNF709	PCBP4	DOCK4
SIN3B	RNF26	HPS4	MMRN1	C17orf67		PTGES2	UBA6	GABRA4	PAK6	SLC4A4	IQCJ-SCHIP1
GZMK	RBCK1	IFT20	AP000873.2	AC024337.2		INTU	MTO1	RD3L	CREB3L4	OBSL1	LIMD1
CSKMT	SBSPON	SYNGAP1	TIAF1	ZNF85		LACTB2	SBK1	ERGIC2	CHGB	TEAD1	KLHL28
AMDHD2	RAB42	ZCCHC7	TNNI2	LRRN3		TUBA8	TRIM45	ZBTB16	ZNF20	PPP2R5A	KRT18
SHFL	C3orf70	GRK3	TMEM254-AS1	ADAMTS8		NHSL1	SUCLG1	SCN1B	APOA1	PILRB	SLC16A12
SLC9A9	ANKRD44	UCP2	DBH-AS1	APBA2		ZNF554	TMEM245	GJA3	AC104162.2	OTUD6B-AS1	ACO1
ADCY1	ZNF438	CDRT4	CERS1	AL139246.5		NUP37	NEXN	SPAG7	ZNF223	ADCY9	SLC25A29
CORO7	NRAS	C14orf132	AP001122.1	SLC2A5		ENPP4	ADORA1	PRKAG2	BCS1L	ACOT11	B3GALNT1
GAB2	RETSAT	MSC-AS1	AL133367.1	TMEM30B		FGF9	TOMM5	MTUS2	TUBD1	GSE1	ARHGAP25
PLEK	TRIM38	C3AR1	FAM83H	PAPPA2		CRAT	EXO5	AK2	TESC	HIST1H3E	EPHA7
ASMTL	MTMR2	PODNL1	LINC01772	BEAN1		ALDH6A1	CDC42EP4	MTFR1L	ATF7IP2	ASB11	CD8A
PHF23	CASP3	ARHGAP30	PSD	PDE1B		HOOK1	PNISR	BCO2	ATP7B	SRPK3	JKAMP
HACD4	JMJD8	TLNRD1	SLC25A21-AS1	LINC00957		SYT13	FHOD3	SMIM4	CR381653.1	ECHDC3	BEND7
KCNMA1	AP3S1	CLEC10A	SERPINB2	CDH24		TAPT1	RPARP-AS1	NR1H2	C1orf105	GOLGA8B	ZNF641
NCF1	POGLUT2	MAP3K12	DNAH1	STX1A		MMP15	ZNF682	PDE4D	RAP2C-AS1	PLAA	AC079174.2
SAMSN1	C6orf47	TUBB3	AC022167.2	ADAMTS3		PCDH9	IGHG3	SELENOS	AL031058.1	NDUFAF2	TMEM265
TMEM60	ACAT2	IGLC2	PATL2	FUT10		MFSD6	AC010980.1	LONP2	AC117453.1	AC116351.1	ISCA2
TRAF7	CLIP3	TSHZ3	AL353135.2	EFCAB13		PPIL1	DNAJC27	OBSL1	C16orf71	HCN2	ATP6AP1L
RARRES1	TRANK1	MEIS3	AL365361.1	AP003110.1		FBXW7	PTAR1	NDFIP2	FBXO40	UROS	PTPN3
ARHGEF40	SLC66A3	C19orf48	GPR174	XPNPEP2		TERF1	CLUH	SLC2A13	AL358472.3	MEOX1	CNOT11
CD248	C6orf120	ERF	CFAP69	PAQR5		FBXO3	NPHP4	MYH7B	MBOAT2	HMGB3	SPEGNB
FAAP100	TFCP2	LY6H	AC116563.1	HTR2A		FAM131C	CEP70	FASTKD1	DYNC1I1	THAP4	AKTIP
MN1	CDH11	PFKFB3	MIAT	ZNF213-AS1		BTBD9	RASA2	PLCXD3	HOXA4	SMCO1	LPAR5
SPINT2	CXCL14	DDIT4L	AP3B2	CD226		AC022034.1	GMDS-DT	SETD3	FAM13A-AS1	TOM1L2	BAALC
PGGHG	PAFAH1B3	YIPF2	AL133342.1	ZNF510		ZC3H12C	AP002761.4	TIMM17A	SPDYE16	BCKDHB	KBTBD3
GNPDA1	PRR14L	DIO3	AC008760.2	HOXB7		CA2	WDR89	GYS1	CD274	CLCN4	TRMT10A
IGHG2	HLTF	STEAP1	AC026369.3	FO393401.1		SVIP	PAXBP1	KLHL18	TMEM237	CHRM2	MTF1
BOK	HLA-DQA2	SNHG19	ELOVL7	RASSF7		ECPAS	GALNT4	RAF1	HOGA1	ACOT9	ZNF131
ATP1B2	RECK	NHSL2	TNIP3	HYAL3		HEY2	PHF5A	ACTR10	ZNF528	DNM1L	FGF14-AS2
EDN1	CAPS	BCL6B	PTCRA	HELLPAR		ATP6V0E2	SYNE2	FLT1	FMO3	POGLUT1	PCNA
CPXM1	RTP4	ALPK1	CTSW	TLE6		RAB3GAP2	SERPINB9	MGAT5	AC007406.3	AS3MT	FCSK
LYL1	CASTOR1	AVPI1	CSF3	SGMS1-AS1		MTRNR2L3	ABRA	KIF1B	CYP46A1	SUCLG2-AS1	MPND
SMAP2	SUSD1	EPHA3	LINC02361	PRRX2		ADGRD1	EFNA4	RRAGD	CDS1	KLC2	RETSAT
RIC1	RERGL	CRYBG1	KDM4D	HYKK		PM20D2	ACTR3B	MROH7	IKZF2	MFSD3	AC211476.6
IL16	SNRPA	SMG6	NDUFV2-AS1	ZKSCAN4		PHF20L1	RDH10	PFDN1	RGPD8	KPNA3	COIL
SMAD3	PLCD3	PAPSS2	LY86-AS1	ZNF552		PRR34-AS1	DCAF6	TAF7	AC006460.2	ADCY4	IVD
RCC2	TSTA3	SLC41A2	LINC01752	ZBP1		GSG1L	STK11IP	PPM1L	AC127024.5	LLPH	WNK2
PLPPR2	TMEM51	CD52	LINC02696	STX18-AS1		TRIM16L	TMEM139	STRIP2	MUC3A	SAMM50	RICTOR
C15orf39	S1PR2	PGS1	THAP7-AS1	TSPAN8		PRDM5	C1QTNF1-AS1	AC092353.2	NSUN7	TBC1D4	OSCP1
SCAMP4	INPP5B	SLC29A3	ZNF665	AC024560.1		MICU2	PHLPP2	SYNGR1	AC092279.1	COQ10A	AC007686.3
KCNE3	IQGAP2	STK38	PYHIN1	CCDC183		ENPP5	CXCL8	AMD1	VWA8	PPP1R14C	LDHD
FCHO2	FAXDC2	EVI2B	GNMT	AC005674.2		ANKMY2	ANKRD52	VPS37A	KCNJ2	FAM241A	FAM43B
CANT1	LILRA5	P4HA3	PPP5D1	CLDN23		PRDM16	PRKAG2	POPDC3	HYDIN	DUSP5	AC005562.1
FZR1	ACP2	CEP120	ASB4	PEAK3		TMEM178B	NEUROD1	PRDM16	LINC01186	RNF122	MLC1
DCUN1D3	DOK4	CDKN2B-AS1	AL355922.1	ZNF670		TUBA4A	CAST	ARPC5L	NIPSNAP3B	RPP14	SPAG4
LRRK1	EML3	NMRAL1	SAPCD1	TAF1A		SLC2A3	ENOX1	NDUFAF2	AC007406.5	AL035078.1	PRIMPOL
MGARP	AFAP1	WDR19	AC007541.1	XRCC3		PKN2	CELSR1	PYCR2	LINC01638	MAOA	LINC01003
LPXN	RDH5	PGGHG	LINC01678	AC023043.1		VPS37A	CITED4	TRPT1	PTPN4	NT5M	GIMAP7
FRMD4B	PRPF19	MEGF6	AC015917.2	ZNF391		PCYT2	LINC01880	TCAP	AC005944.1	TST	GRIA3
SLC11A1	NTRK3	GSDMB	SUSD3	LINC01094		PCOTH	ANK1	TXNDC17	SCUBE3	NHLRC2	JAZF1
ID4	PARP10	KDM5A	PPM1E	PRELID3A		TEK	RTN1	LARP6	AC242426.2	MLF1	PRDM16
SLC39A3	TBX18	KDM2B	GRIK3	PCSK1		AL355596.1	ZNF250	GTF2A2	MAP2	CISH	GABRE
GDPD5	PHYKPL	OSBPL10	FOXO6	LRG1		ZCWPW1	HVCN1	MICAL3	ZNF383	SCUBE2	ZNF324
SNX8	XXYLT1	SLC19A3	AC010168.2	RBM34		CD274	STRN	PIGS	AC097359.2	NIPAL3	COBL
TREM2	CC2D2A	CRTC1	ENPP6	AL441992.1		MIR133A1HG	CSRP3	LIMCH1	RAPGEF4	SLC9A3R1	PLXNA1
SLC16A2	ADRB2	PTX3	C9orf170	AC105219.1		HILPDA	SLC30A3	PCBD1	POT1-AS1	SLC30A3	ZC3H12D
PTK7	HEYL	DEPTOR	AC080013.4	EPS8L1		COPS5	PF4	OXCT1	PHOSPHO1	RWDD3	USP51
FAM107B	GALNS	AC015922.3	ZBED6CL	CDK5R1		CA14	EPN1	DGLUCY	POMZP3	TUBA3E	LINC00924
MYO1D	PRUNE2	AP000525.1	SEMA6A-AS1	CCNT2-AS1		SLC30A2	ZNF658	MYO18B	KCNMB4	LYAR	SLC41A1
OAS1	LINC02381	PRKD2	AC005041.4	SPIRE2		MMUT	ARHGAP19	MZT2A	AC011468.5	PTCD3	GRM1
CD3D	CFAP410	CCL5	AC011337.1	AC105046.1		CORO6	AC008969.1	MTA1	AC010210.1	C18orf25	FRAT2
HMCN1	A1BG	CR1	MAN1B1-DT	HR		"MARCH11"	PNPLA7	MOB4	ABCD2	GLRB	ST8SIA5
GRK6	CHM	EID2B	M1AP	AL122035.2		SNX13	CXCR1	CITED2	GALNT17	PLK2	GINS3
SIGMAR1	DPP3	ZNF83	POU2AF1	AC005520.2		ZNF366	CDK2	METTL7B	SLCO5A1	FRMD5	AC107398.3
TNFAIP8L2	IMPACT	CHSY1	AL355353.1	CD24		ADAMTS9	UNC5B-AS1	MICU2	AP000757.1	CEP70	SHCBP1
IKBIP	MMAA	HOMER3	CEACAM4	ZC3H12B		LINC02517	FAM83F	VWC2	LRRC37A	IFIT2	NECAP1
MFNG	ZDHHC4	TRAF4	MAGEL2	MCM9		FAM217B	FAM110C	SNTA1	GRIP2	TUSC3	AC006333.2
SASH3	ATP2A3	NCKAP1L	AL031123.1	CHMP4C		DCUN1D2	C9orf24	TRIB1	AC124045.1	PIK3C2B	CYTIP
ALOX15B	SLC39A4	LPAR1	DLG5-AS1	TGFA		PGP	AL355596.2	RAP1GAP2	FAM160A2	RAD51C	BX322562.1
ARF5	STK10	SLC26A11	AP002387.2	LINC01355		EPN2	HMGCLL1	ACTN2	AC079834.2	FKBP2	KBTBD12
LMOD1	TMEM80	DMTF1	RIPPLY2	NFIA-AS2		IGF1R	FAM167A-AS1	DEXI	HPR	SACS	FAM118B
CCDC137	ZGPAT	CMTM7	ZMIZ1-AS1	ERICH5		AC005342.1	MAU2	OSBPL1A	AC068473.5	YLPM1	COL22A1
LTC4S	POMZP3	SCARB1	AC107398.3	ARMC12		SLC25A36	ITGB1BP2	ZNF710-AS1	LINC01560	GCSH	NTN1
ZBTB45	LXN	DLG5	KLF3-AS1	AC021016.2		MAVS	ZNF106	MTX2	AC016355.1	NUAK1	IL2RB
FAM49A	DHRS9	BCHE	AUNIP	AP001330.4		GYS1	KIAA1217	KANK1	LINC01138	PPP1R13B	RAC2
LEFTY2	H2AFX	NKG7	FAM171A2	AC023509.3		POPDC3	NEK10	EXOC6B	PSMD6-AS2	DENND1B	TCHP
TGFB3	ID4	CLK4	AC096772.1	AC142472.1		AP003472.2	PARS2	RBBP7	AC095057.3	VWC2	CXADR
GPC3	C1RL	CD4	AL121894.2	AP001107.5		CLIC3	FYB2	C10orf71	ZNF566	EMC6	ELFN1
PDGFB	CAPN15	MCOLN1	NKD1	ERV3-1		PROB1	FAM43A	VEGFA	MIR3936HG	BABAM2	AL627171.2
ACKR1	SLC37A3	DTWD1	CIRBP-AS1	AC096667.1		OTUD6B-AS1	DHX30	C1QBP	NPM2	APOO	XRCC4
TRAPPC2L	UNC119	ZNF449	CCDC74B	AC079414.3		SUCLG2-AS1	ZNF620	FXR2	P2RX5	TMEM71	FBXO27
PI4KB	TXNRD3	FOXRED2	IGHD	LRRC61		KCNJ4	STAP2	AQP7	MYH3	GPT	ETFRF1
SLC19A1	ARHGAP45	IER5L	DDX43	KATNAL2		ELAVL3	ZNF599	COPS4	AC022034.3	SSTR5-AS1	TXLNG
PTX3	IRF5	HOXB-AS1	WHRN	AC116407.1		TFRC	ATP5PO	USO1	LINC01170	CELSR2	DOCK3
BCAT1	PTPN13	KCNT2	PAQR9-AS1	SORCS1		DNAJC27	SS18L1	AIG1	PPP1R3A	CPT2	C5orf46
TK2	TNFAIP6	ZNF503	LINC02606	AL118522.1		NKIRAS1	NDUFS5	DANCR	MCF2L-AS1	SIPA1L2	TRMT10C
XKR8	TMEM59L	DUXAP8	NTNG2	AC006064.4		TTC39A	POLE	LONP1	AC099522.2	ADGRG1	CCDC58
OTULINL	INTS5	NFRKB	EFHB	BEND3		ACYP2	NCKAP5	TIMMDC1	LINC00520	RSAD2	SV2B
DEF6	GMPPA	ACKR4	AC245884.8	AL022328.3		CNTNAP3	AC012574.2	EMC6	SVOP	DLST	CRYGS
AOAH	SLC46A1	CC2D2A	CEMIP			DPF3	SERINC2	EPM2AIP1	LINC02604	FGF9	PPP1R3C
P2RX4	LST1	SLC39A10	CD80			AL953883.1	NDUFA6	ACOT13	GZMA	GPSM1	AC018647.1
SUSD2	SLC39A6	SKIL	AL022328.4			LMBRD2	FAM131C	LSM4	ZNF728	B4GAT1	NACC2
SAMD11	SHOX2	DHX58	KRT17			GCSH	ZNF501	LSMEM2	PRKN	SMAP1	GALNT17
SIGLEC14	FAM98C	SNHG18	MYOZ1			AGAP2	KLF10	AC068700.1	GCOM1	AC025183.1	ZNF415
NOX4	IDO1	DDB2	GIPR			TCP11L2	WDR33	BCL11A	CDH26	CHST6	MMP25
TGFB1I1	CHRAC1	MTHFD1L	AC093627.6			DANT2	AC090409.1	SNHG14	ADRA2A	DIS3L	NUTM2A-AS1
PRKCD	EBP	PYCARD	GRIN2C			DESI1	SNX22	CADM1	CBWD5	CES4A	AC027031.2
LPCAT1	RARG	VWA5A	FOXF2			FABP2	TUBA4A	STAU2	LINC01460	GTF2IRD2	SIK3
TBCC	GPSM2	AP1G2	PCSK1N			LPIN1	VWCE	STK40	AC017100.1	CDA	DHX16
CCR1	PGF	ALDH3B1	CNIH2			AL023754.2	MFSD6	HIF3A	AC007405.3	DLG2	RAB33B
MAD2L2	SYK	NUP155	CD79A			ZBTB43	ZNF790	FAM177A1	AC018362.1	AFAP1L1	POLR2J3
SULT1A1	UST	EBPL	AC023043.1			GPM6A	NRSN2-AS1	FYB2	LCMT1-AS1	DNAJC30	MMACHC
CSF2RB	SLC10A3	SLC7A7	CXCL11			CAP2	CDC37L1-DT	APOO	OPCML	KALRN	GPR176
GLI3	CYB5R4	ZNF581	AC116351.2			IMPA2	LTN1	ACSS2	AL355816.2	LPIN1	PACRGL
OTUD1	MFSD10	SETDB1	ANKRD20A3			PCNX1	AGAP5	SMCO1	KHDC1	LOXL1-AS1	IQCH-AS1
STX6	DOK3	CCNC	HBG1			WWC3	ZBTB11-AS1	PHYH	BRSK2	KIF3A	LTB
SLC43A1	PLXNA4	CASK	HULC			CPNE4	USP28	UBE3C	AL513534.2	ERMP1	AL136038.5
MYD88	FASN	SLC43A1	AC097382.3			GAS2	FNDC5	ADRM1	USP18	C1GALT1C1	IRX3
SAP25	SLC22A3	PTPN13	PRSS21			PPM1E	PPP1R12B	BICD2	TSPYL2	LINC02478	AL122035.2
SLC18B1	TTC38	BTN3A1	TMPPE			FLACC1	ST7	DHCR24	DDN-AS1	TIMM8A	CHTF18
CCDC152	SETD1B	BLMH	AC025175.1			CACNA2D1	PIK3C2A	HECTD1	TMEM100	FYB2	KAT5
STAT5A	TRIM14	SLC35E2B	AC022784.1			CMC4	NDUFB3	COX10	RASGEF1C	CPN2	IRAK1BP1
GPR153	CYB561A3	FBXO17	LINC01857			DDI2	TMEM86B	MAST4	Z83745.1	CUL1	SCGN
RECK	PCIF1	SLC35A5	AC109347.1			KPNA3	TMX4	HOMER1	AC104031.1	ERC1	PITPNC1
RNF168	ANAPC2	DEDD2	AL592295.5			ZDHHC11	ZNF667	PNPO	PLAG1	PACSIN1	CEBPA
ROBO1	ZFP90	PCBP1-AS1	FATE1			LDHD	ZNF528-AS1	AK4	SLC25A10	LINC02269	TMEM100
NFKB2	RFX7	TRPS1	LINC02422			KBTBD12	AC012313.5	NAV2	ABCC12	ITPKA	STOML1
MYO1E	LURAP1L	DCP1B	IL1B			ECHDC3	AC020909.2	FADS3	IP6K3	PLEKHH2	MAP3K10
SHMT2	ITIH3	SULF1	NLRP2			CEBPZOS	GID4	IFRD2	CU633906.5	DDO	AC023494.1
MEIS3	APOL2	PAN3	ZC3H12B			CENPV	AL355488.1	MPP3	RNF157	BAMBI	AC026304.1
CD8A	CADM4	KLRB1	AC107027.3			PSMD14	GATA5	DMD	BBOX1-AS1	TRNP1	MSI2
PDGFC	ANKRD13B	CD6	GZMM			ASB11	ANXA2R	AC025183.1	LINC00896	FAM98A	KCNK3
CALHM6	ZC3H14	ZNF445	AP001330.4			NFS1	SNAI3-AS1	AP3S2	PPP1R3F	UHRF1BP1	AC010210.1
NAGPA	CEP57L1	SLC37A3	SMOC1			CARMN	HACD1	WFS1	SYT13	ZNF710-AS1	ZNF671
DPEP2	BMP6	NFAM1	C6orf132			P2RY14	ELANE	ZBTB38	CFAP58	SIK3	HAPLN2
SLC1A5	TWIST2	CUL7	BNC1			APC	ZSCAN12	THOC7	MSANTD2	PLCB4	AGAP2-AS1
FMNL1	CDC16	SCG5	AL132639.2			GABRA4	ACYP2	GRPEL1	TSKU	GKAP1	TRAM2-AS1
RGS14	OTOA	B3GAT3	AL024507.2			AL355075.4	XIRP2	TNNI3K	FGF11	RASL10B	PLAG1
ISG20	PPM1F	SECTM1	AC006213.1			MIA3	AL109627.1	GFM1	LINC02660	LRRC75A	TNNI3K
FRAT2	CKAP2	MYO1E	ABHD1			OSBPL6	DENND2C	SLC27A6	MYO5B	ST8SIA5	CBWD1
RASSF2	SERPINE1	CCL13	AC079600.3			MYBPC1	ZNF284	ITPK1	CD300LG	BMERB1	CSNK2A2
DSEL	SEC24A	PTPN6	MLXIPL			FEM1C	NKIRAS2	SLC5A1	LZTS1	SELE	ZNF302
TSHZ3	CCDC102A	NOL4L	AL357075.4			DUSP12	ZNF790-AS1	EGLN3	THRB	LINC00672	KIF17
LYN	QTRT1	HRH1	ZBED9			GATD3A	AC015845.2	MCUR1	LINC02268	CRNDE	LMOD3
ATP8B2	GMIP	FUT4	AC009119.1			NUDT13	HBA2	MAOA	AC100847.1	RPAIN	PATJ
CR1	MAD1L1	AKNA	KCNG1			CREB3L1	ANO1	AZGP1	RALYL	HOGA1	AC024560.1
LRCH4	SFI1	PHETA2	LINC02019			P4HTM	UPB1	TIMM50	THPO	ALKAL2	ALS2CL
SH3BP2	PRR7	PAQR7	GORAB-AS1			SUGCT	DCTPP1	MTRNR2L11	AL359232.1	CASZ1	LLGL1
AC110995.1	ZHX3	PRND	AL138955.1			PTPN20	AK3	CDS2	AC068733.3	CPLX3	PARN
CYB561A3	ARHGAP4	ENTR1	AC132192.2			MIR646HG	PXN	TTC1	GPT	MCF2L	RANGAP1
FUOM	NRXN2	MTMR12	CAPN11			PDE4D	AC092353.2	RBM38	LINC02454	TMEM178B	SENP6
RHOBTB1	TYMS	FMNL2	AC010654.1			TUBA3E	ADGRG3	DCTN6	EZH1	RPP25L	AC244033.2
PANK2	SAP30	ZNF426				TMLHE	ATF7IP2	ELAC2	AL358852.1	SGSM1	C2orf27A
CD247	AKR1C2	HENMT1				SPRYD7	NAPA-AS1	ACSL3	ADAMTS17	BNIP1	TBL3
LMO2	ITPA	STAT4				PPARA	AR	METTL5	FAM182A	ATF7IP2	PPP1R1C
EML3	RBBP8	ESS2				IFIT1	COX20	SMIM10L1	KCTD11	PHF20L1	GCC1
SNX10	EFHC1	ZFHX4				PACSIN1	SMIM10L2B	C6	AL359715.1	ARV1	PCSK7
NRBF2	TRBC1	PLEK				GK	CAP2	TMEM116	ZNF536	ELFN1	POMGNT1
HNRNPA1P48	GPR34	TANC2				GRIN3A	GPIHBP1	SNAPIN	DNLZ	AC104825.1	NCBP2AS2
USP4	PSORS1C1	FGR				EPS15L1	AL592183.1	FRMD5	NCKAP5L	NMNAT1	DEPDC5
BATF	POP4	SYCE1L				ALDH7A1	SNURF	PLPBP	PCSK4	GRK4	NOL6
TES	SRGAP2C	KDM5B				MIR22HG	PALM2-AKAP2	NFU1	LCN12	NNT-AS1	ANKMY1
ADAM12	MYO1D	CDKN3				LRRC10	NDUFA12	SLC39A13	COL19A1	CHRNA1	TEAD4
PLCB2	ZNF600	MIR34AHG				CCDC144A	ACO2	TXNDC15	DAB1	PDE6D	CDC7
NFASC	MARK1	TRAF3IP2				LIFR	CHCHD3	TMEM178B	PRRG3	ADRA2C	"MARCH11"
SNHG18	RIN1	COL10A1				FAM180A	SDHA	STOML1	AZIN1-AS1	POMT1	GAS8
ADARB1	VPS33A	FAF2				SHISA3	RHOBTB2	FYCO1	SLN	RAB3A	SYTL1
EPB41L3	CLEC11A	EML3				MYOC	PPP2R2C	GOLGA4	FLRT1	TLCD5	MTMR12
LRRC17	DACT3	PALD1				MAMDC2	ADORA2A	MYBPC1	ATRIP	MISP3	PCDHB13
CCDC149	RGS19	ZNF862				KLRG1	ZNF582-AS1	PPARGC1B	PHACTR3	LINC01460	OCIAD2
MAP1S	KLC4	ARHGEF18				LINC01844	DNAJA4	NT5DC1	LINC00926	AC002057.1	AP4S1
FST	TRAF3IP1	CD2				DMTN	MSH2	FILIP1	AL022345.4	ARFGEF3	CSTF2
XPC	TANGO6	SHOX2				ERICH6-AS1	SATB1	ARL8B	KCNJ12	HAND1	BIRC6
IGHGP	TCTN2	REC8				CACNA2D3	GKAP1	PKD1	KLHDC9	TOGARAM1	C17orf113
MZB1	SLC27A3	RASAL3				VSNL1	MUSK	KAT2B	RNF43	PCBD2	FITM1
FAP	ANG	MEST				CPEB3	NRIP1	ATP13A3	RARA-AS1	C11orf74	CTNNAL1
AC009133.1	GFRA1	IGHA1				AL035670.1	SEPSECS-AS1	TBC1D4	NAPA-AS1	ABHD10	PLPP7
DCHS1	CNNM2	MAPK13				SMIM41	AC074117.1	GFOD1	PROX1	SARM1	SDCBP2-AS1
BACE1	CRYBG1	TSPAN11				ITGA9	FGF14	LRRN3	KBTBD8	AC005523.2	MTERF3
CILP2	CBWD5	FAM91A1				TPD52L1	FCSK	STXBP6	C1orf52	PRKAB2	P2RX3
H2AFX	ZNF581	CXCR6				MCCC1	DIDO1	NEK7	ZNF584	VIPR2	PAQR7
CFP	NRGN	GLI2				FECH	AC011603.2	ADH1B	GAN	AL031666.1	ST20-AS1
IL10	ALOX15B	SORCS2				RPF1	ATP5F1A	SIK2	PTOV1-AS1	SMIM10L2A	AC092171.4
NAGLU	VPS16	NLRC5				MACO1	LCK	CD274	TMEM202-AS1	ANKRD65	MICAL3
MED8	ARMC6	IL34				PPP1R1C	AL031595.3	ZNF622	AC083843.3	STRIP2	TOX2
IKBKB	IGF2	KSR1				ACACB	KIAA1324L	AGL	GCFC2	C5orf63	TRAC
PLAT	WASHC2C	ADM5				SIRT5	WDR3	TSPAN31	CIART	NUDT8	SLC4A5
TMEM222	NKD2	CD7				AL357146.1	CHCHD4	NUDT7	FAM157C	LAD1	SUPV3L1
CHST15	SNHG19	CHST11				AP003068.2	AL133395.1	KLF15	AC012306.2	HOPX	IGLC3
SHF	CCDC71	KCNQ1OT1				AC005414.1	MGMT	AUH	AP002360.1	SRSF8	RABIF
FARP1	AC245297.3	AL356417.2				TMCC1	FBXW7	PSMD11	PLCB4	MIEF2	MTUS2
CLN3	MSC-AS1	EPHB2				MAGI1	HSPA1B	SLC22A5	TTC30B	KATNAL1	PRKRA
TMEM98	LZTFL1	JAK2				TUBE1	ZDHHC11B	DYNC1I1	AC005414.1	SLC14A1	STXBP6
SNED1	COL28A1	CASP1				TPRN	PXN-AS1	MRAS	DGCR6	KIAA1841	LPAR3
PRKCB	RBP4	AL391422.4				BMPR1B	USO1	C19orf33	AL929091.1	FMC1	AC083843.3
ATG7	PODNL1	TLE1				RAP1GAP	FHIT	ARHGAP31	ZNF285	GXYLT2	NCEH1
CCNK	SLC31A2	REXO4				RABGAP1L-DT	SERTAD1	CAT	SLC8A1-AS1	TCP11L2	CMC2
TMC8	ARHGAP25	MAP3K1				OLFML2A	HBQ1	ETFRF1	CEP85L	CYSLTR2	RELCH
PRICKLE2	DNPH1	MYL5				AC025165.5	PDE9A	MCRIP2	RAB3IP	SMCO4	HDHD2
ZFPL1	C12orf66	PLAUR				PCDHGA3	AC103591.3	CCDC167	ST6GALNAC1	RORB	CCNT2
POU2F2	OR51E1	QPRT				AC009318.4	SRL	KLHL21	C20orf204	GLRX2	TRABD
TMEM255B	NEK3	NPTX2				NEDD4L	AF111167.2	SLC25A42	PAN2	FAM222A	NEDD4L
LTB	TRIM4	SPSB1				PDZRN3-AS1	ATP5MGL	NSFL1C	SPATA2L	PPP2R2C	WDR35
HLX	TMTC2	MID1				SLC26A10	HJV	MARK1	AC012358.3	ACADS	SLC29A2
IPO4	SERPINB8	VSIG2				ZNF484	KRBA1	LYPLA1	CEBPE	IER3-AS1	BDP1
COL4A3	RGS1	ANPEP				GPN3	FEM1A	ST8SIA6	DPH5	ENAM	GOLGA8B
HAPLN1	MUS81	PLEKHH2				PNPLA7	ASAP1-IT2	MITF	ARL17B	PIGN	AC103706.1
SHMT1	UBR7	TLE3				LINC02334	HBA1	SLC1A3	ZNF211	AL022162.1	C1orf74
JAML	AL441992.1	IKZF1				PLEKHA5	ECT2	KIFC3	TAPT1	DMKN	PLCB1
WTIP	ZCCHC17	CLEC1A				CCM2L	NRAP	MET	MYO1H	LINC01278	ERVK13-1
HLA-DQA1	TMEM100	BTK				SLC2A12	KLHL15	IPO13	AL137186.2	CWC27	PIP5K1B
PLD2	IL17D	VILL				LRRC49	PAXIP1	TMEM70	PCDHB6	SNPH	MYPN
PIK3CD	TMEM94	ZNF117				SFRP1	PGR	RNF103	AC092296.2	UBFD1	ITCH
PLXNC1	SULT1B1	MEG8				APOOL	NTNG2	MEF2D	AC145207.3	POLR2D	SEMA4B
PHRF1	RNF112	ZNF410				UTP4	AC037198.1	ISOC1	TSLP	LINC00654	MFSD11
TMEM51	FRMD6	SLC12A8				NUDT7	PLGLB1	CA2	C15orf48	PBLD	ZNF483
EDEM2	TP53	DCLK1				NIF3L1	HSPA1A	MTFP1	MPIG6B	GAS8	AMMECR1L
ANPEP	SLPI	TRIAP1				MKLN1-AS	TATDN1	CWC15	CYP21A2	ZNF787	FAM180A
ADRA2A	BLOC1S3	PAAF1				RAB3IP	WDR91	TOB1	CRYM	HS6ST1	AKIRIN2
WAS	KLHL22	ATF5				BTBD11	CSDC2	SEMA5A	MAP3K9	AC007566.1	LIN7B
VEGFC	CYFIP2	LRRC25				AC022034.3	MTRR	RPF1	GLYATL2	CEP63	ZNF519
EVC2	ATG4C	CORO2B				CHGB	NDUFB1	SPRYD7	RGS7BP	CMSS1	AL080248.1
KLRB1	ZNF267	GRPEL2				FNDC5	PALLD	MLLT11	HIST1H2AG	SCRN2	PLD6
AATF	FDXR	FUT8				SPATA13	PALMD	ZYG11B	MIR210HG	MROH7	CXorf40A
POLR3D	USP21	TMEM121				C10orf71-AS1	EIF3CL	ADK	PLIN5	ACO1	AP001062.1
SPHK1	ASAP3	CCN4				CD82	GREB1	HAND1	ZNF530	PCNX1	FOXM1
CAPS	ZNF486	RAPGEF3				AC020741.1	MZT2A	PPT2	DBF4B	DPF3	AL139089.1
NKG7	TMEM39B	CCDC88C				CCDC127	RDX	ENDOG	HES2	XK	FNBP1L
ANKRD27	SLC4A11	A1BG				REV1	PHACTR1	ASB8	AC093726.2	PIK3R3	AASS
TSPYL2	ZNF587	HAPLN1				RALGAPA1	CYREN	NIPSNAP3B	AC138150.1	MCC	INPP4B
HDGFL2	TMEM251	DGKA				SCN9A	ASAP1	PPP1R14C	AC098617.1	BVES-AS1	MPV17L2
ANKRD13D	IL18	TP53				FAM78B	SMN1	MTOR	PCDHB13	AZGP1	AC100756.4
NMI	PTPRD	TNFAIP8				BEX1	CAVIN2	PEX3	ABO	PPP1R1A	MYO10
DACT3	TRPS1	ZNF587B				IRX2	ANO2	DUSP27	DMTN	MARK1	RAD9A
LZTR1	S100B	GRAP				RANBP6	Z97200.1	IVD	LINC01134	ACSM3	CD6
SLAMF6	CARD8	RHBDF1				JAZF1	LINC00665	SPP1	KLK1	ITGAE	RAB43
FAM78A	TBC1D12	PRICKLE2				RAB9B	COX4I1	AKTIP	CHRNA10	CCDC144A	NHSL1
MTA2	GORASP1	"MARCH1"				RAB30	RELL1	UBA3	ABAT	C3orf52	XRCC1
PAK1	GBGT1	TLE4				CLOCK	COL23A1	LMBRD1	C1QTNF1-AS1	RHOD	TMEM164
ANKRD13A	GGCX	CASP10				EPM2AIP1	OGDH	CSDC2	AC018816.1	USP46	AC073896.2
BTN3A3	TSPAN2	PRDM8				TRIM69	DMKN	DESI1	NINL	PTPN20	CHML
MOSPD3	PRSS36	NAB2				NOSTRIN	TSEN2	TM2D3	ETNPPL	KLHL12	ZNF711
TCEAL3	CUL9	MAPK7				ZNF124	DNAJC15	FGF9	TSNAXIP1	PLCD3	MAML3
BRD3OS	CORO2B	AC009283.1				HECW2	AL355001.2	ERVK13-1	CEP70	CHL1-AS2	FNTB
RAP1GDS1	EGFL8	CLIP2				SLC44A5	ZDHHC9	SFXN4	KIAA1324	DAPK2	ANKRD33B
CDO1	BOC	PLXNC1				STOML1	LRRC34	PPP1R7	LRATD1	LINC01569	FNDC4
MIS18BP1	ULK4	GPR183				LINC-PINT	CPNE5	MSI2	ZNF273	PROCR	PGBD4
IDUA	RNF185	SLC38A6				VLDLR-AS1	ASB18	FSD2	STX1B	HECTD4	VIM-AS1
CCL26	VAV3	CYTIP				TMEM143	SLC48A1	EPS15L1	AC010173.1	ZNF625	LINC02035
NCOA5	ZNF101	TMEM108				PPP1R3B	BICRA	TIMM17B	AL512353.1	PRMT5	CUL2
NCAPD2	GOLM1	ZNF346				EREG	ING3	CRY2	LRFN1	CLOCK	ASPG
SPSB1	KYAT3	FGD1				SLC35D2	SHISA6	MEIS1	AP000662.1	CSTF2	NANOS3
MBD6	AGPAT5	DOCK11				AC116351.1	COQ2	GCSH	RBM20	KLF12	SUGT1
HTR2B	CDCA4	VMO1				NPPC	AC002057.1	WDR33	AC021097.1	EHD3	C1orf226
RBP1	PABPC3	ERV3-1				LINC01018	RBM26	RNFT1-DT	MAPK4	HP	THAP7-AS1
NEO1	GASK1A	CD8A				PCCA	ZC3H8	LRRFIP2	SLC2A12	AC087457.1	NIPSNAP3B
DHRS1	TEP1	SNHG12				ZC3H6	MTMR11	PARP1	LINC00882	HLTF	MTX3
TRIM4	SLC9A3-AS1	FMO3				BRAF	AIG1	ACOT2	AL360178.1	CD300LG	PTPN20
AL391422.4	PAF1	PDLIM4				ATG4D	LINC01505	XK	C15orf65	GPR27	ENTR1
ARHGAP9	CAD	TMEM132A				TNRC6C	VANGL2	FAM207A	AC104825.1	EFNA1	CDC23
EML4	MCUB	KLRD1				MIGA2	SNHG14	SPRY2	AQP7	PROM1	NCAPG
XRCC1	NOX4	NDC80				HOGA1	CCDC130	PIGP	AC007877.1	CDK14	AC008124.1
MLKL	ACTR8	TMEM91				AKAP3	ASPG	ECHDC3	SYT15	ZNF536	ZCCHC4
FASN	TMEM54	LEF1				IRX6	ATP1A2	RANBP6	PCDHGB6	EPG5	LEF1
ALOX5	C10orf143	TWIST1				AL009177.1	UAP1L1	EEF1E1	AC092329.4	CYP46A1	SLC7A6
FBXO17	ZNF185	MEDAG				CCDC197	AC117453.1	TM7SF2	RGN	RNF207	ATAD3C
BTBD10	NPTXR	RGS14				TSPAN1	GARS-DT	FMC1	C12orf60	TBX3	TSGA10
GLIS3	TMEM60	BTG3				CREB1	AL929091.1	ITGA3	MYADML2	LMTK2	ADHFE1
LXN	KCNT2	TMTC4				ZIK1	AC083798.2	TP53INP2	AL513487.1	SVOP	NDUFAF7
IKZF3	ADAM33	WDR90				ERVMER34-1	SCARF1	TST	RTKN2	BDH1	IMMP2L
ALCAM	INPP5D	NYNRIN				LINC02208	"MARCH2"	ITPRIP	STRIT1	PLEKHM3	AL391834.2
FNDC1	AKNA	C8orf58				AL645568.1	NKTR	CEP85	GRHL1	AP003068.2	RIPK3
SLC16A3	MCM7	SRGAP1				HSF2	RILPL1	ATP8A1	CCM2L	AP002360.1	CCNF
ANGPTL4	WDR46	CAPN3				F3	LRRC14B	MCCC2	AC005076.1	MYBL1	AC003102.1
SNAI1	RAB7B	ADAP1				TAS2R14	AL158206.1	COMTD1	DPYSL4	THUMPD3	AC091978.1
SMARCD1	HAUS4	LPAR2				ATRNL1	PPFIBP1	MALSU1	SEMA6D	TEK	EHHADH
MR1	ALKBH8	HELLPAR				ERCC6L2	PITPNM2	DVL1	CEP76	NINJ2	PPP2R3C
PPIH	NBPF19	ATG4C				LSM14B	PIK3R3	DLST	BTBD8	DUSP13	PIK3C2B
UBA7	ZNF764	KIT				GCDH	CRYM	AIFM2	AC110620.2	NPAS2	SH3YL1
CDR2	USP27X	CPSF4				NDNF	FBXW9	USP5	C12orf54	RSKR	NUDT6
ST14	TATDN2	ERN1				RIMKLA	MAOB	INPP5J	CCDC110	INTS8	CCNJL
BTN3A1	SPATA18	CYTL1				AL158038.1	RAD21	MAPKAP1	AL109627.1	SLC16A1-AS1	AC055822.1
PRDM1	PEX16	NLRP1				USP19	SLC41A1	DENND1B	LRRC38	AC005332.6	BRMS1L
ZBTB48	PCGF6	GEN1				LINC01275	TCAP	PCGF5	KCNA7	BYSL	CEP44
ADPGK	FDXACB1	TTN-AS1				AC106791.1	ELOF1	IMPA1	SBK1	ZNF302	KLHL15
JAK3	TOB1-AS1	WDR54				LINC00472	MOAP1	SCN7A	LINC00327	ST8SIA6	SF3B4
FAM102B	DDX19A	ADAMTS14				LIPE	HIPK2	CYP2J2	HIST1H3B	FAHD2A	GLIPR1L2
ERN1	EXD2	CLDN15				KAT7	SLC2A12	UBE2G1	CNTNAP2	EFNA5	MAGI1
CDK10	SUV39H1	DEF6				ICA1	EPOR	CDKN2D	SLCO4C1	DENND5B	SEMA3D
ARFGAP1	B4GALT2	UNC119B				PCDHGA7	PDE12	FBN2	WDSUB1	CRPPA	ZNF529
TLR5	GSTA4	CACHD1				SYCP2L	GZMB	MRS2	DOK7	AC018413.1	TUBB3
SLC12A9	SIRT7	CD96				ASIC3	FASTKD3	OSTM1	AARD	TOMM40L	NEIL1
PEX5	SLC2A10	SLC17A9				PEX14	ZNF100	AASDHPPT	SCN2B	TMEM38B	ATP8A1
NRAS	POLR3H	ATP11C				TSPOAP1	KCNE1B	PPP1R11	AL136171.2	SYT7	C11orf21
PAFAH1B3	A2M-AS1	MN1				AC002057.1	ZNF525	AC091544.2	GPR27	ZNF462	NARS2
TBXA2R	FBXL4	AC004889.1				SYN2	NR6A1	PVR	BMT2	NUDT22	LINC00926
TRMT1	EPHB6	PAX8-AS1				OPLAH	ZNF440	TMED1	DNA2	TIMM21	TRIM13
SPN	CLDN15	ENDOV				C17orf58	ZBTB43	TMEM134	ARHGEF3	MINDY1	CBWD2
TRAPPC6A	EBPL	BCL2L11				DENND5B	EMC6	TMEM67	AC020909.2	NECAB3	EID2B
LACC1	TACSTD2	AC244090.1				SDR39U1	CAMKMT	COMMD1	C4orf36	AC009093.6	RCBTB1
C2orf27A	HTR2B	SYTL2				FN3K	AC091607.2	TMTC1	AL358781.1	KIN	AL591543.1
C19orf25	GSPT2	PHF13				ZNF546	ZNF665	CEP70	USHBP1	SNURF	IP6K3
BOC	RASSF5	MEAK7				NR4A3	CELSR2	CMC4	AC087741.1	EPN3	CCDC43
IGSF6	ACBD4	POLR3D				FEN1	CCDC171	PGAM5	CHRNE	PRKAR2B	THSD4
DNM3OS	NRIP2	AC134312.5				BPNT1	PCMTD1	AL355596.1	AC090517.2	HS3ST3A1	PPP1R13B
IGLC3	STIMATE	WASF1				SMIM5	MTUS1	BCL2L13	PRIMA1	MIR1-1HG-AS1	LAT
MICAL1	VDR	B4GALT4				BCL11A	LTO1	RXYLT1	RSAD2	SEC61A2	DPYSL4
EP400	GTPBP6	SLC46A1				S100A14	AL136366.1	SLCO3A1	FAM184A	MSANTD3	DGAT2
BID	IRF8	RNF24				TLL2	ZNF483	CCDC69	LINC00311	DHRS11	ETV4
FCHSD1	SCRN1	GLIS1				AC053545.1	AP003472.2	DSC2	ZNF724	SCAPER	LINC02660
TAF5L	FBP1	ADAM22				CASZ1	NAT1	GATD3B	LINC01719	PODXL2	BCORL1
OSR1	CEACAM19	PSD				ALDH1L1-AS2	FABP5	MFN1	CISH	AIFM2	DOHH
VEPH1	AC108047.1	ACVR2A				BX664615.2	MYCT1	RBP7	ZNF821	FGF14	ZNF700
ITGAL	FAM20A	AC127502.2				USP54	DISP1	CACYBP	AC113133.1	MIA2	FBXO30
TNK2	B3GNT9	EAF1				FAM201A	B3GNT7	RMND5B	SOX2-OT	SMC2	SPIN2B
DACT1	FAM110A	TBC1D10A				NR2C1	TIGD2	MAN2A2	LINC02447	CLIC6	SKAP1
PCED1B-AS1	PAK1	DOT1L				CCDC170	ZGRF1	DCUN1D2	FAM110C	AC022784.1	SCYL3
LRRC8D	TRAM2	STYXL1				LINC01880	TSPAN32	VIPR2	AC015845.2	SUPV3L1	NABP1
TRIM41	GLI2	PC				NAA15	GATA6	USP19	DUSP8	CDC23	RAI1
TKFC	RP2	GSTZ1				CCNB1IP1	TUBB4B	LYPLAL1	ERBB4	TSGA10	ZFP30
SRCAP	CEP164	PLK1				EPHX2	AZU1	CYP4B1	ABCC6	NALCN	AC079922.2
DAGLB	ZBTB6	NAT14				SLC4A4	TIMM8B	ASF1A	VLDLR-AS1	DCUN1D2	AL137003.2
ST8SIA4	CDK19	ENKD1				SEC61A2	AC118549.1	TMEM106B	NAV2-AS2	AGAP5	PDE4D
F8A1	XPNPEP2	RASL11B				LMLN	LINC00174	TMEM223	CPNE4	SHROOM4	LRATD1
VAV1	IL10RA	VPS37D				COL23A1	MCCC2	WDR37	AC022613.2	ABCB8	AL022162.1
ACKR4	STK38	TTC7A				SYT15	KIAA2026	COA6	AC090772.3	DNASE1L1	CCDC9B
MCM5	HSD17B14	AC048341.1				C21orf62-AS1	LINC01409	PPP3CC	CCDC96	CU638689.4	EPC2
TBC1D2	FHL5	GMDS				TACO1	AC083862.2	TTC19	LINC01270	RALGAPA1	NBEAL2
AL392172.1	CHST14	TMEM59L				AC245060.5	RHOQ	TRAP1	CDNF	RHOF	ADAP2
CLPB	ZNF624	LINC01426				FNIP1	TCEANC	PYGM	CELSR2	TIGD7	IPMK
CD200R1	CCDC106	SCARA3				P2RX6	LTV1	RRP15	SRRM4	POLB	LIME1
CST7	ZBTB7C	APOBEC3F				KIAA1143	IL18RAP	CYB5A	AL031123.2	SYNDIG1	TAZ
GALNT15	ATG7	RHPN1				FSD2	CTNNA3	TKTL1	CLYBL	SNAPC3	DPH7
PCSK5	FAM122C	PKNOX2				EYA1	ADAMTS9-AS2	SH3BGR	CADM2	OFD1	ANKS1B
ARID5A	NOP2	TEN1				SIAE	TTLL11	MOAP1	CCDC153	RNF8	RCHY1
ERLIN1	SCG2	GMDS-DT				CDKL5	DHX16	SPTB	AL391244.2	ZC3H8	RUVBL1
ZNF469	AADAT	KDM4C				AC023632.2	PCDHB5	ECSIT	B4GALT4	GALNT18	ARHGAP27
TWIST2	RNASE3	EPYC				SDCBP2-AS1	CFLAR	TRUB2	LINC01355	AC020741.1	PIGL
LHPP	C18orf54	WT1				PLPP6	NRDE2	TIMP4	AC096733.2	LCLAT1	MCCC2
IGFLR1	IFT46	IFT52				SYNDIG1	TIMM21	DEFA3	TVP23A	LINC02517	AC051618.1
PYCR1	PI16	BRD1				AC004846.1	HOXA-AS2	LRRC39	COQ7	ZNF697	EFNA5
NRROS	ENTPD1	LDB1				PDK1	CISD1	TMEM164	GFAP	HOMER1	PPIP5K1
ZNF217	CDON	TMEM216				RNF144B	BX664727.3	NAA20	HBQ1	AC008966.1	ARMH4
KLHL6	BRMS1L	ARHGAP28				PTPRU	MOB4	CYFIP2	DEFA4	PARD6B	GATB
KCTD17	SLC30A6	AC004816.2				MPV17L	BORCS5	CBLB	SEMA4D	MMP15	ART3
SRC	MORC2	MR1				BTBD8	IRX4	Z85996.3	BDNF	FAM219A	RASGRP2
MEGF6	GXYLT1	CCL4				ABCA5	GPC1	KCNMB2	ACAP1	B4GALNT3	NBPF11
KLHL2	TBL1X	RAB11FIP1				PCF11-AS1	GPR146	HVCN1	AC040168.1	GREB1L	PROSER3
CMIP	ZNF883	TOP1MT				LYSMD3	TMOD1	SAMD12	ARVCF	IGIP	EEPD1
HSCB	BMX	MMP17				USP9Y	NDUFS1	SIPA1L2	NPAS3	PKD1L1	OXCT2
PPM1M	ZFPM1	TSKU				RD3L	WDR34	PPP2R3B	MEFV	CCDC93	NUDT19
ZNF384	CALML4	FAM171B				DMRTA1	ZNF674	CELSR1	PIH1D2	KCNJ12	CD27
LIME1	TTLL12	PTPN2				AC010359.3	CADM2	ADHFE1	ASIC3	GPR155	RELA-DT
ERI1	WASF3	TLR8				CIART	NSUN7	ORMDL2	GRK4	ACSBG1	HOMER1
CCDC151	SP4	COL27A1				ZNF419	CBX4	TBX5	ADAMTS9-AS2	JAK2	ZNF611
PRF1	RAB3D	ANKRD65				CCDC113	VMAC	CIAPIN1	ZNF699	CPAMD8	ENTPD5
FZD2	CD7	LINC00205				ERMAP	SAPCD1-AS1	CDC37L1	HYPK	OARD1	GALNT15
USP42	FRK	IL15RA				ARHGAP5-AS1	NDUFB5	DPAGT1	PIFO	IGHMBP2	RNF6
REEP4	SFRP4	CCDC18-AS1				UBA5	FCGR1B	KATNAL1	ZNF181	PCLO	ZCCHC9
POGLUT2	RNASEL	CSTA				AC107398.3	ZNF763	CTNNA3	PHKA1	PACRG	LINC00847
SULF1	RFTN2	ARHGAP45				RICTOR	RBM27	PNMT	AL359220.1	ZNF714	ACYP2
CDK14	TMEM236	OMD				SLC38A11	LEAP2	CORO6	AC024933.1	ZNF883	NAA30
SLC37A3	SNX7	FAM89A				ST3GAL6-AS1	DOCK5	C8orf88	AC012615.1	FBXL17	MIR1915HG
YDJC	DOHH	WDR86				AC147651.1	SLC35F5	AHSA1	PLEKHM3	LNX2	C16orf91
BRF1	KRBOX4	TRIM4				THAP10	QKI	CPT2	RBM12B	GCAT	HACD2
USP3	SRR	EYA2				PAQR9	PCMT1	VAT1L	AL356234.3	ZFP30	CRCP
KIAA0040	FAM117B	FBLN7				GCLC	CCL21	KCNJ2	MATN1-AS1	HEY1	LYRM1
LRRC75A	TMEM107	WSCD1				BANCR	SLC25A23	GCNT2	SLC25A34	AL080248.1	MYBPC1
HLA-DOA	APH1B	PRKAR1B				RAB3A	MTIF3	RRAD	INKA2-AS1	AC006059.1	CCDC191
NEK6	AC008280.3	DDX55				MLXIPL	PRTN3	PDCD10	GDF10	MLPH	EXOC3L1
DGCR8	TREM2	BTN2A2				AC019080.1	USP13	PPA2	AL162595.1	TBX5-AS1	USP54
NLRC5	AC025181.2	COL24A1				AC064807.1	AZGP1	LCLAT1	MIR600HG	ARHGAP5-AS1	ZSCAN16
ARHGAP4	PDIA5	PRR5L				AL451069.1	RFESD	LMBRD2	SMIM11B	GTF2E2	LGR5
HYI	VMO1	CHRDL1				RFX2	UPP1	COQ10B	ASXL3	LINC02609	BX664615.2
TMEM64	KCND1	ADAM33				AC023157.3	PROSER1	SLC1A4	COL4A5	HIRA	TTF1
CA11	GFRA2	CNTROB				IDI2-AS1	ZBTB39	OLFML2A	AC019205.1	C16orf87	CENPS
THAP3	OTULINL	DHX57				MIS18A	AC010210.1	PPP1R3B	WIPF3	NPIPA3	ATL2
CCDC144NL-AS1	LINC01088	COL21A1				SYPL2	MIR29B2CHG	ADCY9	PARD6G-AS1	CETN3	RMRP
P2RY10	SLC35B3	KLRK1				UBXN10	RNPC3	MICAL2	CASKIN1	PRICKLE3	STBD1
CNTRL	AL596244.1	BIN2				ZNF728	FAM167B	CXXC4	AL355001.2	LINC00467	PIK3C3
AL157392.3	KCNK3	AC021054.1				DAPK2	ARHGDIG	POP7	RGR	NUDT14	RNF25
NABP2	NUDT2	OMG				ST8SIA6	NUDT4	GAREM1	PCDHB9	RWDD2B	PRC1
FKBP2	PPBP	HEXD				PTGR1	PREX2	ASB15	TFCP2L1	NAPB	SRCAP
SIGLEC7	PIK3C2B	PNMA8B				LINC02175	NECTIN1	C3orf52	AC092353.2	TBC1D7	GJA3
TUBGCP3	PTK7	GPR176				PTPRZ1	AQP7	PARD6B	TNNI3K	EGR4	PACSIN1
MYO7A	MFSD9	TMTC2				ZBED3-AS1	DDIT3	HOMER2	AC002401.4	OPLAH	KIFC2
GPR161	RNF19B	RNF217				GCNT2	AC100847.1	KLHL24	UBA6-AS1	ZSCAN5A	ATAT1
PCK2	AC092718.4	XXYLT1				ADRA1A	TBKBP1	UBL4A	GPLD1	SOX7	SLC52A3
ATP13A1	RAD51C	LGI2				MTRNR2L11	LINC00921	PPP1R3C	KIFC2	LINC00665	PREX1
DTX4	AC009133.1	DLG2				SLCO5A1	PACRG	EXTL3	SOX6	NXPE3	S1PR4
GFER	GALNT14	FCGR1A				AP002495.1	VASH2	PRKRA	TAF1A	ALDH4A1	TOGARAM2
GPR146	PDLIM4	OSR1				PCDHGB7	DLG3	PROB1	PDE4C	GATA6-AS1	CNBD2
PTPRJ	TRMO	PTPRD				PTGR2	FLACC1	SLC7A2	BCDIN3D	GALNT5	LINC02502
FMN1	NCAPD2	TMEM268				TMEM139	ZNF519	SLCO5A1	DDX28	C2CD4C	SPC24
C1RL	GSKIP	MCUB				DNER	SELENOW	PDE8B	OSER1-DT	LINC01750	UBN2
FCMR	RIPK3	AC074212.1				GEMIN5	VCL	MMP15	C2CD4C	POLR3E	HPRT1
INTS4	SEPTIN8	POGLUT2				NEK10	LPP-AS2	MYOM1	AC026979.2	INPP5J	EFNB2
SNX30	TDRKH	MUC1				LZTS3	KRAS	DUSP13	ZCWPW2	ZNF678	BIN2
HHLA3	NIPAL2	FAM171A2				RNF207	S1PR1	AP003472.2	SPATA41	ITPR3	AL645608.7
ANKRD6	TPGS1	BX284668.5				ZNF596	CDC7	FADS1	CXorf40A	APTX	ACACA
ZNF45	RBM4B	GCHFR				AC092828.1	C2orf49	ADRA1A	QPCTL	KCNJ4	PPP1R3E
CRTC1	ORC5	C1orf216				WDR60	HECTD1	GKAP1	LRRC8C-DT	C1QTNF1-AS1	RUNX2
TNFAIP8L1	BPNT1	SCAMP5				CCN3	NUFIP1	HCN4	MRNIP	LRRC27	FBXL6
CD38	IL10	FAM171A1				AL589935.1	DIPK1C	RANGAP1	AL590399.1	LINC02502	HAUS8
HAUS7	SPTLC3	SULT1A3				ZNF491	FAN1	TIMM22	SAMD10	GPR1	CBR3-AS1
PIK3R5	OXNAD1	RTKN2				CEACAM1	CDKL5	CLCC1	LY6H	SMG7	BRSK1
CLEC2D	RBFA	IFI44L				FIGN	FUBP1	IARS	WDPCP	FAHD2B	MIATNB
ART4	LDOC1	KNOP1				FTCD	NDUFV1	C11orf21	CA14	C11orf54	TENT4B
FJX1	EIF5AL1	RFLNA				PRKCZ	ZNF789	PACSIN3	TMEM178B	MPP7	FBXL2
AC008875.3	CASS4	SRRM3				MSX1	PTGDR2	PLEKHA5	ZKSCAN2-DT	ADAM11	RBFOX1
MAP3K7CL	STK36	SLIT2				POU6F2	KMT2C	USP53	FOXO4	AC018645.3	AP002807.1
ZFHX4	PTGFR	ZNF205				MFSD11	PGAP2	TSPAN7	ZNF629	WDR62	GPN2
ANKRD13B	FGD3	VWCE				AL109741.1	GYS1	TMEM88	BTBD11	RAP1GAP	AL021707.6
TP53I3	MNS1	SASH3				KLRD1	CREB3L1	SLC9A6	AC040169.1	DHRS7C	GDAP1
ITPA	PARP6	KIAA1211L				AL928654.1	LINC02185	SPEG	ARFGEF3	PEX11B	GPR132
SLIT2	SLC23A2	H1FX-AS1				SLC7A6	LRRC4	DGKD	VWC2	SLC6A17	DNAJB5
GBGT1	MAML1	GZMA				MPP2	WIPF3	ASB11	AL138762.1	SLC7A6	BCDIN3D
DNM1	PRR16	PCED1B				CEP85L	TLNRD1	ALDH1L1	ASIP	OSBP2	ORC6
ST3GAL5	PCSK1	MRO				FAM184A	GRAMD1C	ATG4D	PRICKLE3	ISLR2	SAMD10
HRH1	ARMCX4	TBC1D10C				FRRS1L	AC100756.4	CABLES2	VIP	PCDHB14	LRRC10
IRAK4	MTHFD1L	COL7A1				MEIS1	ZFP41	SLC20A2	AL355312.2	COP1	STOX2
DBR1	AMIGO2	SYTL1				RNF175	ZNF571	PPM1K-DT	AC097376.3	EIF2B3	IRX4
PCNX3	C16orf54	ZNF385D				DSCC1	TDRD6	KIAA0232	AC078881.1	MICAL3	PIGB
NOMO3	BCL2L12	CALML4				RALYL	ABCB1	VPS45	AL391684.1	MORN4	AL591895.1
BLOC1S4	SAC3D1	NAP1L5				PLEKHA7	LINC01006	PDXP	ZNF257	PORCN	SHMT1
CTSW	CAMK1	PTAFR				AL162171.3	ZNF107	CACNA2D1	GABPB1-IT1	NDUFAF6	JRK
PTPN7	UNG	COLEC11				ZNF121	IL20RA	PLIN5	LINC01679	RD3L	MICU3
ABCG1	ZNF596	TMEM87B				AP002755.1	C8orf88	MUSTN1	GPM6A	TBX5	TTC28-AS1
KIAA1324L	RWDD2B	LINC02693				VWA8	CNOT11	AIMP2	BDNF-AS	TGFB2	GFOD2
IFITM10	ADAP1	AC132872.1				PNPLA4	SYT13	MYH14	KCNN2	AL031058.1	ADM
KCNT2	TFEC	RAD51D				TBX5	MPPED2	FAM189A2	C2orf66	SH3GL2	AC100847.1
CD6	ATP6AP1L	IL2RG				FYB2	NES	MAPT	FAM184B	LSMEM2	NLGN1
ZNF43	PRR5L	SERPINB9P1				SMC2-AS1	TMEM81	TACO1	SHBG	ZNF793-AS1	STRIP2
GEMIN7	LCN1	SLC25A25				KLF15	TRIM16L	AC020909.2	GBP5	FN3K	RLF
ARFIP1	ALCAM	TMCO4				AL359715.1	GPR155	TPD52L1	PODXL2	PLAAT1	PTCH2
PKNOX1	PC	ZBTB9				TMEM150C	SMIM5	SLC2A12	BICRA	BCOR	ZNF143
ABTB2	OCEL1	FGD2				KCNJ3	TCF15	LIN7B	KIAA1211L	VTI1A	ZNF791
AXIN1	MBNL1-AS1	CABLES1				CDNF	SIMC1	SLAIN2	LINC00910	METTL23	ANKRD36B
APLNR	NTRK1	CAPN5				HLF	ZNF41	HSF2	AC068338.2	CCNJL	VEZT
GFRA1	IGIP	AC021097.2				NRXN1	AC011346.1	GLDN	KIAA1549L	AFMID	ZNF586
TBC1D12	TRIAP1	PRRX2				AL445222.1	TLR6	ACOT11	LINC00844	CHGB	ABCC8
RRP1B	SHROOM1	OPN3				TMEM198	Z85996.3	ABTB2	AL121658.1	GNPDA2	MYOCD
GPR176	TAPBPL	GLIS3				BVES-AS1	DFFB	OCIAD2	BX322234.1	AC139768.1	RNFT1
ARHGEF19	BATF	RHNO1				COL21A1	THBS4	MAIP1	SEMA6A	CDC37L1-DT	CXCR6
DOK4	ATP23	MTMR11				ABHD1	WT1	AC037198.1	LINC01816	MTERF2	CCDC86
TLR1	NFAM1	AC005291.1				TONSL	FTX	RAB11FIP4	ASTN1	C15orf65	VRK1
CD3G	LILRB4	HIST1H4J				LINC00622	ZNF418	TRMT2B	TMEM99	CDYL	MSS51
AP5Z1	GMDS	TMEM240				USP37	SND1-IT1	DTD1	B9D2	PRRG3	SPTBN5
RNF113A	NPFF	MIR155HG				MYSM1	AL021155.5	MPO	AC010889.1	STAT4	MOB1B
CD300LF	DKK2	ABCC4				AC137630.3	SDHB	ADRA2C	TMEM117	AC009403.1	INTS2
CSTA	CCDC57	EFNB3				AC107068.1	AL845331.2	ASCC1	AL158071.5	HSF2	PARTICL
NYNRIN	GLDN	SPATA18				ZNF462	ATP5F1C	ZHX2	LMO7-AS1	PDZD2	NGLY1
ATG16L2	OGFOD2	RTL5				KCNA4	TSPAN11	LDHD	LINC00997	MAPRE3	ANXA3
GPR162	PCDHB14	CASP7				AL031666.1	WBP4	DGKG	AC093788.1	CNFN	LINC02478
MX2	GALNT6	DBH-AS1				PROK1	ZNF366	UCHL5	BX255925.1	PPARGC1B	MAP2
C16orf54	ZNF329	HAAO				MIR193BHG	ZNF57	MLPH	AZU1	IFT122	GMIP
USF1	TRIM6	APOBEC3D				LCNL1	TYRP1	IRX5	AL117335.1	GFM2	SLF1
LRRC23	CEP41	DNALI1				SLITRK2	AC025159.1	SNRNP27	FOXC2-AS1	AL139398.1	ORC5
AL365361.1	LIMD2	CD28				AL031432.4	LINC02502	OSGEPL1	MAP6D1	PRDM16-DT	EPHA4
OLFML1	NVL	SYTL4				LSMEM2	NRP1	KBTBD13	ARHGEF33	MYOC	FAAP24
HMCN2	BTBD9	CCDC102A				EEF2KMT	CENPN	ORC6	SDCBP2-AS1	TMEM63B	ARHGEF9
DGKA	ZNF787	RGS1				SOX9-AS1	MINDY1	DLGAP1-AS1	JPH1	CALHM5	MIR29B2CHG
DEAF1	KAZN	DDX11				PRKN	VDAC2	ZNF770	ADAM21	PCCA-DT	TMEM260
C8orf58	PLPP6	CCDC191				DICER1-AS1	CIPC	MFSD11	FAM66D	AL109627.1	LIFR-AS1
ROR2	ZCCHC3	CNTLN				RBM28	ZNF888	CHST9	NEXN-AS1	CCDC85C	PARG
PHF13	TRAF5	HIVEP1				APOO	ADAM22	TAPT1	AC004069.1	PGBD5	ZBTB25
TSPAN5	ECRG4	IL4I1				XKR6	GABRE	SYNDIG1	SRSF12	KRBA1	ITPRIP
ITGAX	IBA57	GNA14				AC005670.3	DLD	MMUT	WAKMAR2	LRIF1	ZNF467
PPFIBP2	AC093849.2	CD300A				BBS2	LINC-PINT	FASTKD5	PRDM8	ARHGEF3	HLTF
CLSTN2	MCM6	CD3D				LRRC20	SLC22A18	HRH2	AC007032.1	ZCWPW2	CLCF1
AL096870.8	ITGBL1	SNHG17				AL136169.1	MAGEE1	BMT2	AL049840.6	ZNF483	MIR1-1HG-AS1
CCL4	ZNF681	TMEM44				SPAG5	HIPK3	MAP2K3	TUB	ALS2CL	EML2
PFKFB3	ZDHHC12	CGREF1				ZNRF3-AS1	NDUFA9	MAPK9	AC100793.2	TARSL2	PTPRK
SETDB1	TTC39C	CUL9				SNX22	ZNF432	EBNA1BP2	SDHAF4	CHRNA5	CAPN3
ALDH3B1	CASP8	IKZF3				ABCC8	PNO1	HDHD5	DMC1	AC027575.2	NAT1
CCDC86	MRTFA	PTGES				LINC00844	GTF2H2	CASZ1	SPACA9	ETV4	AC027601.6
DBP	PCED1A	PVT1				MKKS	DUSP13	COQ3	LINC00702	ATG10	FBXL22
MROH1	ZNF627	FAM76B				LRMDA	AC069503.1	SKIDA1	INSYN1	CHROMR	SLC9A3-AS1
ZNF212	FAP	EPS8L2				AL513487.1	IGHG4	FXN	GSC	AC036176.1	SLC49A4
DOK1	HSPA6	WRN				DGKG	USP33	AL022162.1	CCL5	MOSPD1	CLOCK
AC037198.1	ACAD8	PIK3CG				PRKAR2B	B3GALT2	CLEC4G	TMEM17	SCX	AC138649.1
RAB3IL1	ITGA8	ELAC1				CCDC122	LRRC39	GLRX2	EXPH5	SENP3	CTR9
AKNA	ZNF468	SCD5				DNAJC28	TSPOAP1	UNC13B	RSKR	ABCA5	RGS14
ARFIP2	PGM2	AASDH				GPD1	PTGER2	AP5M1	SH3PXD2A-AS1	DNM3	FAM161A
IL2RG	NAP1L3	ADCY7				ESRRB	UQCRC2	AC138649.1	TSNARE1	ISOC1	ENOX1
PTK2B	ZNF322	PLCB2				AC006213.3	ASB14	NUP98	CARNS1	GPAM	TBXA2R
IQSEC3	DUSP18	OAS1				KATNAL1	KHDC1	ZNF738	ARHGAP20	LINC01505	PCOTH
RASAL3	LLGL2	ZNF10				AC024560.4	ZNF669	PUDP	ATG10	FAM110C	IL12RB1
LCK	ECD	PCGF1				FOXD3	MARK3	TUBA3D	KCNC3	IL6	ITGB8
S1PR4	HAPLN1	FAM228B				AC005674.2	COL4A6	NAV2-AS2	SNX32	NKRF	PFAS
AL354836.1	RAB11FIP5	GFPT2				LAYN	RAPH1	MED9	ZNF449	SNX15	TMEM131L
ULK3	STK32C	LRRC8D				RELCH	SEMA7A	PLA2G12A	AF241728.2	BEND7	SLITRK4
AL583785.1	CMTM5	DOC2B				GCNT3	TM4SF1	SLC1A2	RORB	GDPGP1	SEMA3A
ZNF783	MAP11	TRAF3IP3				KLF3-AS1	PROK2	MIR4458HG	AL359258.2	TMEM63C	ZFP62
LTB4R	AL049840.5	NBPF1				PARD6B	PEMT	DPF3	IRX5	SNX7	DNAJC16
OSCAR	MSANTD3	MIR497HG				FAM221A	KBTBD12	AR	BVES-AS1	RALGPS1	CNTNAP3B
PLCB3	ZBTB33	CIITA				AC006213.2	UBA6-AS1	TNFRSF12A	KDM7A-DT	METTL2B	TSPAN8
SLC29A3	IFT81	TRIM66				GPSM1	BLOC1S5	CCDC91	SPX	IRGQ	FZD5
SLC38A5	C12orf75	OCLN				AC090241.2	ZNF330	DHRS7C	ZNF701	LRP8	TATDN3
CDH24	PLPP5	CYB561D1				WT1	OXCT2	RIMKLA	AC084198.2	PTGDR2	ENTPD3-AS1
AC245297.3	RGS10	ARNTL				FAM184B	HYKK	TIMM44	TNFRSF17	NUDT6	KCNC4
SCG2	DVL2	LINC00626				LINC02604	IGLC3	FAM20B	UBE2L5	DNAJC24	BEND3
LRRC45	HK3	SAPCD1				HMMR	CYYR1	CHST7	NRF1	SIRT4	CARD16
TRIM35	PFAS	STAMBPL1				ZNF681	MTRNR2L8	C17orf75	AC005523.2	OXSM	ZNF710-AS1
ODF3B	TTLL5	PTPRN				AC006141.1	STK33	AC126468.1	FRS3	C11orf1	NPIPB4
FNDC10	CLIC3	PABPC3				AC107021.2	GPS2	TYRP1	ZFP37	ADCK1	SMNDC1
SERPINA1	TMCC1-AS1	F2RL2				HS2ST1	HSDL2	RPRD1A	NUF2	LYRM7	FLVCR1-DT
TBC1D10A	NOP14-AS1	OPCML				GP6	P2RX3	TRIM16L	AC055822.1	AMPH	EEF1AKMT1
CAPN5	GAS2L3	IGHG4				PIDD1	TMEM38B	CDIP1	LINC01275	DPH7	SLC26A4
TICAM2	SLC36A1	TRANK1				PCSK4	ELP5	NRXN1	HIF1A-AS3	PCDHGA2	ADD2
HDAC10	TMC8	SNHG11				SOX6	OLFM2	EFCAB2	PNMT	HMCN2	AL035587.1
FLRT2	ASB9	PSD4				AC107027.3	NDUFB6	MRRF	LINC02688	LINC01844	DGKA
RSPRY1	RBM34	XG				BMP8B	HIST1H2BD	KCNQ4	USP30	KCNF1	USP20
SIT1	CHMP4C	MID2				MPPED2	AFF1	COL23A1	UBE2Q2L	FAM222B	NSD1
FBLN7	LRRN4CL	BNC2-AS1				AL136962.1	PGM1	EIPR1	AC139768.1	U91328.1	PDCL
CC2D1B	IKZF1	IGFLR1				DIPK1C	ZNF667-AS1	THAP11	AC130324.3	B3GALT2	BRWD3
GIPC3	RBBP9	ZBTB48				ZNF483	PTPN20	KLC2	AC002558.3	ZNF565	GFI1
ZNF710	TGDS	GDPD5				AC145423.2	KTN1	GBA2	AC024909.1	ZNF415	SLC14A1
INHBB	ZW10	CD3G				CAPN10	USF1	TTC4	SHISA9	PROB1	COL28A1
ACAP1	UBL7-AS1	CRABP2				FRMPD4	ASIC3	PPARA	TGFBR3L	TVP23B	ZNF202
AMMECR1	PPL	VDR				SMIM11B	AL627171.2	CBX7	ZSCAN9	PTGES3L	LRR1
KCNJ5	ACE	USP42				PLEKHA6	DLC1	VTA1	PGM5P3-AS1	AC009118.3	GRAMD2B
CD7	TWIST1	CST7				TLN2	GPR135	APLN	AL159169.2	CLEC16A	TRAF2
AC018647.1	MIA	STARD5				NR2C2	LINC00987	FGF14	AL731533.2	HIST1H2BD	C12orf54
LINC00632	PACC1	VASH2				MAPK8IP1	ZNF37A	HAND2-AS1	CXCR2	ANKRD46	TYW1
PTPN22	LYRM9	AL050309.1				AC008610.1	TRIM65	TGFBR3L	ALG11	MMACHC	WWOX
SLC46A1	CNTN4	PTPN22				SLC12A2	ETFA	FN3K	RASD2	EPHA4	KLRB1
KLF16	TRIM41	DLG4				NT5C3A	UBR5-AS1	ODR4	RHBDL1	TAMM41	PEX1
MIR155HG	ZSCAN21	CD300C				C5orf22	UBE3C	VANGL1	AC040904.1	SMYD4	IL15
LINC01480	AL136169.1	RNF212				AL133243.3	AGTPBP1	ARHGEF37	ANKRD34B	TMEM79	DIO3OS
NRG1	PTPRF	GYG2				LINC00840	POLR2I	DAPK2	AC010201.2	AUH	ZNF547
CD27	HHLA3	ERMAP				NRTN	RCBTB1	ROPN1B	KIAA0556	MAPKBP1	FAM86C1
TMEM59L	GIN1	CD86				ZNF665	KCNQ1	"MARCH11"	STC2	C9orf24	PRKCZ
CNEP1R1	VIPR2	IGSF10				AC104162.2	POC1A	CRYM	EPN3	EFR3B	GET4
ACSL5	WNT5A	ZNF675				EGFL8	ADCYAP1R1	AL355596.2	AP003465.1	COQ3	GPR160
LMNB2	CORO7	ENTPD7				AC024610.2	LINC02334	MEIS2	ASB10	INSYN1	PDE4C
GDF6	DLG4	ZCCHC9				AL109615.3	CASKIN2	ADO	MBNL3	TATDN1	TIGD1
PIM2	TTLL3	ZNF133				TSPYL5	SCAF8	TCF15	EPHB1	TBC1D19	COL23A1
GNPNAT1	CASP6	GPRC5A				FAHD2B	CDH23	GPN3	AC005498.3	CHAC2	CD8B
RGS19	ADCY1	VPS13B				SEMA4D	NPIPB5	ABRA	PTPN3	UBR5-AS1	SLC16A14
UBA6-AS1	PSRC1	CCDC144A				CARNS1	HDHD5	PGR	CEP19	CNNM4	HIVEP3
ALDH1L2	BTK	CLSTN2				AC010168.2	CAV1	DOCK3	DANT2	GPT2	AP003486.1
LINC01094	NPM3	IL15				LINC00629	AL022311.1	OPA3	SNHG22	UBN2	ZCCHC3
UCK2	TRIM9	SH2D4A				DPH6-DT	AC093627.5	TRIM55	AL138999.1	AP003472.2	PLXNA4
DOCK8	ATP8B4	CHSY3				CCDC168	MICU2	ST6GALNAC1	FGFBP3	ZNF213	DFFB
LY6G5B	KCNA2	SHTN1				CLIC6	AEN	ACAD8	FANCB	AL353622.1	AASDH
TBKBP1	MME	ADPRM				SMIM2-AS1	KLHL17	AL590999.1	TEX29	PPARGC1A	ENPP5
GIMAP2	HSPA12A	TDRP				ENOSF1	ACE2	NLK	NEB	ZNF805	CD3D
ADGRG6	FMNL1	RAB36				MTHFS	SFXN1	TXNDC9	TEKT3	TIPARP-AS1	CRIPAK
TLR2	PIM2	HHIPL1				ZNF639	MIR17HG	RASL10B	MHENCR	SV2B	LINC01186
RASSF5	AC009951.6	SERPINF2				TTTY10	ARHGEF12	MAGEF1	GPRASP1	GLIDR	MMP11
NBPF12	RAB24	STK36				AC114316.1	ZFHX2-AS1	AL670729.3	CASC2	ANG	HOMER2
GDF15	CAMK1D	FAM149A				ZNF229	LCN2	KBTBD12	LINC01550	VCPKMT	GPR157
KIT	ENTPD7	PLPPR4				SDK2	MAST4	CITED4	TDRD6	ATP8A1	BDH1
VDR	MTHFSD	CD180				SLC2A11	CMTM8	THEM6	HPDL	SHC4	AC027682.6
LIMD2	DENND6B	MORC4				BX004807.1	EPHA7	WDR12	N4BP3	RRS1	WDR12
CEP164	NPNT	CGAS				ZNF880	COX14	MTRR	ZFHX2	CNOT4	ZNF382
CNFN	SERPINA5	NXT2				TGFBR3L	NDUFAF4	WDR34	ACOX2	ZNF404	BMX
MOB3C	TRMT44	SEPTIN1				PTCD2	PRKN	B4GALNT3	ASB16-AS1	ZNF331	KDM7A-DT
BORCS8	AP000254.2	LILRB3				HSD17B13	CENPL	AL356218.2	LY6G5C	VLDLR-AS1	PPARD
STON1	TUBB3	HILPDA				BEND3	BAG3	AL022341.2	DNAAF4	ADGRB2	DOCK10
SNHG12	ITGA9-AS1	ACSF2				AL136454.1	CUL5	AC009509.4	AL139246.5	CENPA	ABHD8
SKAP1	SIGLEC14	FOXC1				TRAF3IP2-AS1	AL035530.2	PROX1	LINC02777	AL162171.3	PHF3
GNA15	HEATR6	ZFP37				AL022328.4	SLC25A30	ENTPD3-AS1	AC127070.2	MCF2L-AS1	AC068733.3
ZNF746	SEMA3B	APBB1IP				ZNF608	VAT1L	PAM16	RD3L	FRAS1	TMEM17
MAPK13	ZNF577	ATP6AP1L				EPC1	RRP8	ZBTB43	RNF175	TTF1	DRC3
LMF1	SFR1	CCT6B				AC103740.1	ENAM	DIP2C	BCAS4	CSF3	REEP1
LIPE-AS1	AACS	VANGL2				AL121655.1	ZNF780B	MTHFS	RNF123	AL359715.3	ADRA1B
BMF	SLC16A9	KCNJ14				MAEL	CABLES2	AC137932.2	CCT6B	ABCC8	SLC25A16
PSD	PDP2	PTGER1				AC099508.1	TUFT1	DUSP5	AC090114.2	CXorf40A	LINC02352
DNPH1	SERPINF2	MTHFSD				RNF157	NBPF9	KLHL30	MAP1LC3B2	ZBTB5	FBXO46
GPR68	DGCR8	OXT				U91328.1	SLC9C1	SEMA3G	RPARP-AS1	AC139887.2	OSBP2
FAM13C	LRRC69	PTPN7				LINC00689	NDUFB10	TMLHE	ZDHHC11B	TMOD2	CDC6
P2RX1	FAM49A	CROCC				KCNJ2-AS1	PCDHGA10	RNF208	AC006333.2	SYT13	AGER
OAS2	ZFP28	LTB4R				SPOCK3	ANO5	LCN6	LINC00685	KIF2A	ARAP2
USP20	DTNB	ARSI				FAM153B	FBXO32	HMGCS2	PRTN3	MKLN1-AS	TUT1
TBCEL	THSD7A	TMEM260				ASB4	PCDHGB2	MGAT4C	SPATC1L	MYOT	BMS1
SHTN1	AC007406.5	SLC2A6				RGN	LDB2	DHRS7B	KCNA4	LYPD1	AC022706.1
HES6	WDR19	ATP8B4				LCMT2	U2AF1	HDAC9	AP003307.1	COL9A1	SLC35E4
ADAM33	GPATCH11	STAP2				BRCC3	AP001528.1	DNAJA3	AC131009.3	STARD4	NEK8
FGD2	FAM189B	POLR1E				AP003117.1	SCRN3	STN1	AP004609.3	LCN12	FPGT
CROCC	AC104162.2	GPBAR1				ZNF280B	LMBR1L	WDR77	HSPA1L	CPNE4	DOK5
ZNF600	GPR161	FAM225B				GSDMC	AP3M2	RHOF	AL390957.1	RMI2	LPP-AS2
AC006504.5	AC093323.1	LINC01355				CHIC1	RTCB	C18orf25	LINC02846	LINC01719	LIPT1
LOXL4	TMEM254	ZBTB8A				ZNF566	TRIM55	HBB	RAB3A	DACH1	CEP57
CENPP	CTTNBP2	DZIP3				SDHAF4	MYO16	ZMYND8	AC002550.2	MME	PCDHB12
PUS7	MICALL2	PROM1				AC011379.1	AL450998.2	ARG2	AC084824.4	EIF1B-AS1	MEGF9
GLI2	ADCK1	VENTX				ZNF674-AS1	TUT4	NOLC1	TOLLIP-AS1	ANO7	C15orf65
RAI14	RBBP5	CAPS				RAPGEFL1	CHDH	RNF43	AL049828.1	SPX	AC074032.1
IGHD	RBM26-AS1	CDPF1				AC116312.1	CWC27	FARSB	ZNF546	AC138649.1	SNX16
ATP10A	PGBD1	LRRC8E				SNURF	B4GALT3	TMEM63B	HELLPAR	ALAS2	MEAK7
DDX58	DISC1	ANKRD13B				MTERF2	C1QTNF9	CMC2	AL049775.3	TMEM102	E2F1
ARHGAP15	CARD8-AS1	UVRAG				RUNX1T1	ABCD2	LYRM1	TBC1D8-AS1	MTERF3	PROX1
CMTM4	CRISPLD1	GRAP2				AC087239.1	MDH2	TUBG1	NPTN-IT1	CRACR2B	AC008393.1
PIK3CG	OCLN	LINC01140				AR	SHANK3	PFKFB2	TEKT4	AL354920.1	KL
TTLL3	HAUS7	SP140L				PPP1R3D	ATPAF2	ZADH2	CCDC181	MCEE	ING2
DHRS12	WDR4	MIAT				TMEM201	WT1-AS	FCN3	AC026979.4	TMEM44	GUF1
UTP14A	ITGB4	AGER				AL683813.1	PLOD2	LOXL4	SRGAP2B	ANKRD36C	SLC9A5
FAM83D	PARVG	SKA1				RPP14	MBLAC2	SYT7	AC004067.1	NDUFAF1	CSRNP3
SEZ6L2	TYRO3	VAV2				GDF10	COBL	PRDM16-DT	KLF15	INKA2-AS1	TMEM268
ZNF607	PHF19	MB21D2				KCNQ4	DHRS13	LINC02502	AL589843.1	RCOR2	PSMG3-AS1
SAA1	GSTT2B	TRIM5				ESYT3	BRD3	AC020659.1	BAALC-AS1	GAL3ST3	DCP1A
TSHZ2	CCND2-AS1	SCNN1D				AC003659.1	CCDC74A	RIC3	LINC01091	ZNF561-AS1	MIAT
DTD2	DHCR7	ROBO3				AC068700.1	ATG10	CWC27	AC004076.2	FAM24B	LYRM9
RAB7B	NBPF11	NFATC2				SERP2	COX4I2	PCDHB14	SP4	ASIC3	FAM241B
FPR1	CKS2	MLKL				AC007325.2	ETFB	SLC7A1	TSTD3	HIST1H1E	GSTM2
Z97192.3	SPATA2L	SLC13A3				SNHG4	ARSG	AC006480.2	LPAR3	DNAJC3-DT	ARHGDIG
TFPT	IL7R	KIAA1755				TBC1D19	KIF25	AL080248.1	GPR82	UBE2T	LINC00665
MYO1G	LINC01697	TRMO				LRCH2	ZBTB2	DNLZ	HMGN3-AS1	SLCO5A1	VPS33A
SLC25A17	BCAS4	ARMH4				LINC01341	FGF14-AS2	LIAS	KLRB1	LPAR5	LCK
HPS6	VAV1	SIGLEC9				HDHD5	PPP3CB-AS1	RFC3	AC100756.4	SLC25A16	CDC42SE2
PARS2	ACAN	B9D2				FAM215B	KCNIP2	LUCAT1	AC012640.2	F2RL3	C19orf54
ANKRD54	ZNF710	VMAC				MTFMT	DDIAS	DOCK5	MACC1	RARB	NDUFAF5
GALNT12	CACNA2D4	EBF4				FGF13	ACOT11	KBTBD8	AP000692.2	RRAGB	GK5
SPATA18	BCL2	SHISAL1				AL109955.1	SENP5	DPYSL4	USP46-AS1	CCDC154	AC004825.2
PLA2G4A	MAD2L1	EPSTI1				PRRT4	ST6GALNAC3	CADM4	GNB3	ZMAT5	ZNF175
BCL2L11	MAP3K7CL	CLEC4A				CLCN4	CCBE1	POF1B	APOM	ALKBH1	BEX1
SUPT3H	PYGO2	AC007998.3				LINC00863	CAMKK1	ORC3	NLGN3	AL162595.1	TMEM74B
UNC13D	GAS6-DT	PIEZO2				C8orf48	ZNF528	CHDH	CSMD2	PAK6	CD274
ZBTB9	PARD6B	CYP4X1				TRMT11	TRIB1	AL162171.3	FOSB	PRRT3	BISPR
TMEM216	MEGF6	DOCK8				AL513534.2	IL17RD	TSR1	COL4A6	AC009812.4	SOCS2
SYNE3	GDF15	TCTN2				ERCC4	FAM216A	NPPC	AP003068.2	GABRA4	HDAC9
SEL1L3	FREM1	CCDC149				C8orf82	UBR4	IL17RB	C10orf143	OSGIN1	TEP1
OLFM2	EFS	SLAMF6				HCN2	DLAT	TUBA8	AC016957.2	ASB5	CEP131
TMEM236	ZNF786	MYO1G				PPM1K-DT	NPLOC4	ADAM11	Z99289.2	RUNDC3B	ASB5
OBI1	NAV3	NHLRC4				RIMS3	BHMT2	APOB	AL662884.3	ZNF253	FAM76B
MMP19	BDNF-AS	CFAP69				AC005726.1	TMEM67	BOLA1	LINC00653	AC009509.4	GCAT
CDC37L1-DT	ZNF780A	RBBP5				GREB1L	SUCO	C11orf74	STAG3	PLEKHA6	C18orf21
ARID3A	ZNF408	LYSMD2				CCDC89	ARHGAP5	CLCN4	LAMA1	AC055822.1	SCUBE3
GPATCH3	ST8SIA4	FBXO44				DZIP3	CRLS1	AL365259.1	ADM5	NUP210	SLC22A4
MBIP	MIR497HG	ZNF212				ACVR2A	GRTP1	AL139260.1	AC007566.1	ELF4	PAQR9
KLHL17	CYP7B1	ITGA10				AC090348.1	ZIK1	TSPYL4	GMEB2	LINC00622	OGDHL
RAB3D	TOP2A	GMEB2				MIR600HG	KLHL21	SEMA3B	ESM1	AL021392.1	KANSL2
DHX34	ANKAR	GNLY				ZNF552	TMCC2	MISP3	TP63	DAND5	AC124016.2
CNTNAP1	TBC1D8	PPP1R1B				CCSER1	FASTKD2	REEP1	AP000704.1	HJV	FBF1
C5orf38	STON2	NINJ2				MARVELD2	TMEM62	AL953883.1	CEACAM19	RPRML	SMG8
AP001062.1	POU2F2	RPGRIP1L				ALAS2	AC018647.1	HMCES	GATD3A	CAMK2A	CCNA2
F2RL2	MMP16	EDA2R				LRRC34	PPM1H	NBEA	PGA5	ZNF827	HMGA1
BATF3	ITIH4	LRRK1				SUPV3L1	VCPKMT	UNC5CL	BHLHE40-AS1	AP001160.3	Z97989.1
CCDC102A	NSMCE2	ZNF75D				ZNF540	FHL1	ACE2	ZNF577	DAPL1	MICALL1
MAP6	NCS1	DCLRE1C				FAM135A	FXR1	CRADD	AMY2B	LRTOMT	PPP3CB-AS1
NPR1	SRRM3	RAB7B				ADGRA3	PPTC7	CCDC85C	TUBA3E	ZNF433-AS1	AL357146.1
PARP10	PHOSPHO2	AC145207.5				AC083870.1	ACVR2B	CFAP61	AC004908.2	PRPF40B	AC083799.1
PHF19	C4BPB	DBF4				SRP14-AS1	COPS4	OSBP2	AC004540.2	MRM1	BRF2
IL18BP	APAF1	RTN4RL2				UMODL1-AS1	DCLK2	DDX28	TMEM139	L3MBTL1	PMP2
NAALADL1	ABRAXAS1	TBX19				LEAP2	MS4A3	TUBA3E	LETM2	INHBB	GLI1
SCG5	TENT4A	LINC02126				LINC00893	N4BP3	MIEF2	RNF128	DUSP19	SLC35D1
AC068587.4	AC073611.1	SLC24A1				GCH1	HCG27	AC023494.1	RORC	VXN	PEX7
DNALI1	CCDC151	ADCY1				PRR11	SLC16A12-AS1	MTFMT	MYO5C	AMER1	PPP1R3B
GEMIN4	P2RY11	AL512329.2				SMIM11A	AC008393.1	APCDD1	TMEM163	TMEM161B-AS1	ARL4C
LY75	ELOVL6	RIN1				TOP2A	LRRC2	CMSS1	GKAP1	AC008915.2	FGGY
CCNF	NPR3	LRIG3				AC007878.1	AGMO	MSMO1	DUSP4	PPM1E	FAM155B
SMURF1	FAM160A2	SRSF12				CLCN6	SMG1	IGSF9B	AC015871.4	RAB24	TCAIM
ABCC3	CEBPA	AL137026.1				ZNF257	RNF43	RAI2	KIF25	AFG1L	AC092164.1
CRLF3	PGM3	HDX				GRIP2	PARTICL	LINC01715	SNX22	TMEM139	INCA1
QTRT2	CDKN3	RAD18				SLC22A5	SAMD5	KAT5	TPD52	SPACA6	TASP1
EMC1-AS1	KCTD21	AC120049.1				STRADB	SPIDR	SGPP2	TSKS	NUDT15	CBFA2T3
GNB1L	ZC4H2	CCDC146				EFR3B	PROM1	HBEGF	IQCC	KCNN3	UNG
AC093627.4	ACSM5	PRDM6				AL596202.1	VRK2	LRRC38	AC123912.4	AC090204.1	LPXN
APOBEC3F	LRFN4	CCBE1				FAM227A	SLC25A36	SLC29A2	NOXA1	AL928654.1	NOTCH2NLC
ZNF398	FAM124B	PARPBP				ZNF605	RPP38	SCARA5	GABRE	COL4A6	RIOX1
FNDC4	MILR1	SERTAD4				ACTG2	ABITRAM	CAVIN4	GARNL3	RAP1GAP2	AC008443.1
MS4A4E	XYLT1	SLC2A5				ABCD2	ZNF689	ENO2	AGAP2	GCOM1	PIEZO2
AC008280.3	CYP4F3	LINC01094				TMEM132C	ASB15	CCDC9B	BTBD9	ATP6V1FNB	SHPK
STRIP1	SYTL4	CDAN1				ROPN1B	ZNF622	BRF2	B4GALNT3	CLCN2	ZBTB1
CDK2	SLC2A9	KLHL17				AC009061.2	KIAA1211L	SGSM1	AC083798.2	MAN1B1-DT	MTFR1
REM1	SEPTIN1	PELI2				STAC2	NAV2-AS2	OXSM	FFAR4	AC022364.1	MIR3936HG
C12orf4	AC009113.1	ZFP62				EXOG	ZNF540	CBWD2	GOLGA8O	TDRP	TRIM55
IQCG	AL138756.1	LINC02614				HCG25	AC007038.2	MYOC	HCG22	EPB41L4A	GULP1
GCA	ITGAX	ACAP1				LINC02147	TMEM38A	MIPEP	AL645728.1	CENPV	SFTA1P
PFKFB4	SPHK2	CCDC170				AC097376.3	KRIT1	GATB	ZEB2-AS1	TESK2	EPB41
GABPB1	AC145207.5	CDCA4				ALG11	ZNF611	C2orf76	CEACAM1	TLL2	YOD1
CD33	PLAAT1	UTP14A				ZNF710-AS1	SLC1A3	RUVBL1	SGSM1	AC093827.4	DENND2C
ZNF529-AS1	CSTF2	EVA1A				SEMA3D	RBM38	LPCAT4	INHBB	ZMAT1	ZFAND4
MIR1915HG	ZFAT	CASTOR3				MDM1	PHF20L1	EPN3	HM13-AS1	GCK	DSN1
TWIST1	CDK14	ZNF561-AS1				SCOC-AS1	KLHL3	ASIP	ZNF300	FAM104B	NRIP1
ZNF275	GGACT	TAF1				AC078883.1	SLC1A1	FRMD3	C16orf46	SIK1B	TRIT1
CDAN1	AP001505.1	IFT140				TRMT61B	SYN1	AL162231.1	AC009118.2	C1orf53	TCF20
ZNF286A	CCNYL1	BMP2				XKR4	HLA-DOA	AC092069.1	AL353194.1	CBARP	TVP23B
SUFU	SLC29A3	TLL1				ENTPD2	RAB3A	CYP1A1	AC020910.5	FAM135A	S100A2
APAF1	DUXAP8	AL135905.1				DUSP13	HOXB3	TMEM38A	PADI2	TNIK	GZMH
C11orf80	SPN	BBC3				LINC01186	MYO15B	DEFA4	AC015982.2	AC009955.2	PCDHGA2
ZNF142	FGFBP2	LINC00623				TIMM23B	SH3PXD2A	RHOBTB2	LINC01715	SLC16A14	APOOL
RGS9	CHST13	ZNF646				PCDHGA2	PPP4R1	ZNF385B	ZNF860	NAV2-AS2	C8orf49
P4HA3	AMPD2	GPRASP1				HS3ST3A1	KLHL18	AL359715.3	CAMKMT	FERMT1	C14orf28
PLXNA4	BBS4	FAM24B				Z99572.1	CHAMP1	HMBS	LINC01515	INTU	SULT1A3
HAPLN3	MXD3	PNMA2				LINC01170	SP1	C6orf136	AC008555.4	KIAA1549	DNAJC18
PRDM4	ZFHX4	SARDH				SMTNL2	NHLRC2	AL021392.1	TMSB15B.1	AL355596.1	SPHKAP
AC067838.1	HAS2	MT1A				CCDC36	HIVEP3	WBP4	AC079414.3	ZNF692	ATP8B4
TRIM3	WAC-AS1	MOSPD2				AC135050.6	BLNK	ERVMER34-1	LRRC7	SIK1	SPRED2
LOXL3	RHBDD3	ZNF596				AC016065.1	TUB	LMTK2	CBX2	FAM189A2	LINC01535
LAT	DUS4L	GALNT12				AC025048.2	SPSB2	SNURF	SP5	LPP-AS2	ZNF17
TNRC6C-AS1	EEF1AKMT1	TEX41				ARHGAP24	NUDT15	ATP6V1C2	AC015819.2	AVPR2	THAP2
APBB3	CKMT2-AS1	CEP112				IGSF9B	TRIP11	LINC02615	AC022706.1	AL513548.1	GPR162
SPHK2	SMG6	ZNF564				PTGDR2	ZBTB21	NKAPL	KIAA0895	ACYP1	MYH14
CD8B	AL354836.1	BPIFB4				CFAP58	PLK2	AC022893.1	SPAG8	AJM1	DOLPP1
GATA3	PNMA8B	CDON				AC073896.2	FBF1	PPP1R1C	AL163051.1	AC069503.1	ASPA
IGHM	NLE1	AC026471.4				RNGTT	SART3	ANK1	GOLGA6L4	AC012306.2	FCMR
RAD9A	HAUS5	ADAM32				HBEGF	IL15	GPR89A	POF1B	SLC38A3	ABHD17B
FDXR	CCDC88B	ABHD3				ANKRD36B	AL137127.1	ASXL3	CDK11B	ANKRD26	RAB11FIP4
C15orf65	SH2D2A	TTC39B				TMEM44-AS1	LINC00863	NQO2	FABP2	C11orf49	LINC00622
CCRL2	MDK	ZAP70				VIPR2	DST	HERC3	AC005736.1	PABPC5	ADCY1
AC010331.1	KCNMB4	CA5B				AC009005.1	ORC2	CAPN10	APLF	LINC00639	ZNF571-AS1
TEAD4	LRRC37A2	ORC5				PRRG1	POPDC3	RRAS2	ZNF182	CGRRF1	MARK1
FGD1	PAOX	IL2RB				AC010735.2	GPAT2	NTN1	SLC17A7	LRP4	NR2F2-AS1
CCDC22	ANKMY1	POU6F1				AMN1	SGCD	RDH5	ZSCAN5A	SEMA3E	RNF215
MED26	PDCD2L	PRRT3				SP2	TMCC1	AL353801.3	ZNF541	PRDM16	ZNF528
ZNF646	CAPN5	CSMD1				AC009955.2	SGPP2	SDHAF4	NHS	CFAP58	EPB41L5
P2RY8	AC092164.1	P2RY8				JAKMIP3	QRSL1	LINC01128	PYROXD2	YOD1	GAS2L3
TRIM11	OLMALINC	ADGRG6				CADM2	ATP1B1	NR0B2	RTCA-AS1	DNAH14	YDJC
MAP3K12	AP001816.1	CHGA				COLEC10	XIRP1	AC239868.1	EYA1	RASSF8-AS1	PAIP2B
FRAT1	CDH6	TRIM59				AP001469.3	DENND1C	EPB41	C6orf163	GNB3	ZNF562
JRKL	PFKFB4	NFYA				FXN	SEMA5A	NECTIN1	THAP9	C5orf58	CASTOR1
CCDC183	CCL5	ZFP82				LUCAT1	GPR89A	NPTXR	AC244033.2	TIMELESS	ZNF331
WDR25	OPN3	SLC25A43				AC005332.3	ZNF208	KCNA4	FAM160A1	PNMT	CCDC183
ANXA2R	LINC00891	POC1A				CASP9	WDR37	COG5	SHISAL1	AC244033.2	ZSWIM7
ROBO3	DOCK10	TMEM51				PLCXD2	IFI6	ASB1	LEAP2	HMGCS2	DAND5
RELT	RNASEH1-AS1	SPATA41				AARS2	SNHG10	AC106738.1	ZAP70	C8G	GPAM
EVA1A	LINC01426	TMED8				ALDH5A1	UBQLN4	INSYN1	GCKR	TRAF3IP2-AS1	CERS4
OSBPL3	RFC4	TBC1D12				LNX2	NDUFA8	SLC25A34	AC017033.1	MDM1	LENG9
C3orf38	ENDOV	SAXO2				KIAA1549	PPP1R3B	AL136298.1	C8orf37	NDC1	AC093849.2
S100A3	NRXN3	MAPK8IP1				STK35	AFG3L2	DHRS11	AL035461.2	AC004816.2	NSUN2
ICOSLG	TMEM17	NXT1				ZFP3	ZNF585B	ATP8B1	ADRA1A	AL008721.2	PPT2
RPP25	CD300LF	C2orf27A				GFAP	RBM12B	AC004233.2	WDR78	ZNF548	GAS1RR
SLC66A1	KCNA5	AC142472.1				SLC29A2	PTCD3	EVI5L	KRBA2	DPYSL4	HID1
GPR65	AC092944.1	RFX3				PDE8B	UBE2L5	AS3MT	AL391069.2	MSS51	N6AMT1
VNN1	LGR6	KAT14				KIF3A	ABCG2	ASB2	CACNA2D2	PROSER1	RIOX2
TXNRD3	C5AR2	ATP10A				SYT7	RRAGD	BCKDHB	AC008915.2	ZNF713	CASP8
TIPIN	AL035071.1	TNFRSF14-AS1				BNC1	KANSL1	STOX2	RABGAP1L-DT	AQP4	VPS37D
TSEN54	ZNF350	OTOA				ZNF208	AC016831.1	ABHD1	AP000487.1	MARVELD2	TMEM267
AL591895.1	SYTL2	SETBP1				CDCA2	ZNF770	AC147651.1	LINC02289	FAM47E	ZSCAN9
TRMT44	TUBGCP4	ZNF273				AC019205.1	LRSAM1	GUCA1C	MANEAL	AC124852.1	AC007998.3
SYTL1	POLH	SNAI1				KIF2A	ZNF280C	TSEN2	ORC1	MRM3	PHKG1
WWC1	RHPN2	OSCAR				NR3C2	CDCA2	EPHA4	SMIM5	ZSCAN2	REEP6
WFDC2	PAPLN	AC009120.2				SLC35E3	CTR9	ALG14	DNAJC5B	FBXL8	NUDT2
APEX2	FAM149A	KCNS1				CNTN3	EIF4E	PEX13	NRL	ELAC1	IQGAP3
PWP2	STEAP3	MIATNB				ATP6V0E2-AS1	YIPF4	MIR1-1HG-AS1	AFP	LAMA5-AS1	C10orf71
AC011484.1	NPIPB2	GOLGA8O				WIPF3	TRAK1	C16orf87	CD27	EMILIN3	CYP26B1
TC2N	KLRB1	LINC01341				ESRRG	PSD3	TMEM200C	RNF227	METTL7B	ACTL10
AL355816.2	AC105942.1	MMP16				NUP50-DT	AL162231.2	LINC00663	PSTK	KBTBD13	RIMS4
MROH6	LRRC4B	EEF1AKMT3				AC005291.1	PAK6	IP6K3	AC008429.1	QRSL1	TMEM25
NBPF14	KYNU	ARSG				PDE11A	CYP39A1	EXOSC5	HOOK1	FAM198B-AS1	AP001816.1
MAFF	HRH1	LPXN				SGSM1	ECPAS	AC026369.2	C16orf54	ZNF446	ACAN
SP140L	ZNF670	STK32B				CXCL6	HERC4	SLCO4A1	EIF3CL	CAV3	RAD51-AS1
SFR1	CDC6	RASA4				AC015813.1	KHDC4	SEMA5B	AC016949.1	EEF2KMT	KLC4
GEMIN8	HPS4	VNN1				CAB39L	MADD	IRS1	AL592435.1	CHST9	ALMS1
ZNF773	AC136475.5	EMX2OS				MDGA1	TNFRSF11B	ZDHHC11	TSPAN1	ERBB4	BRCA1
MAD1L1	PON3	AVIL				GLRB	AC099791.2	GAP43	CAMK4	C2orf88	ELOVL2
USP18	SLC41A2	CD300LF				FGF18	AC079922.2	SCN2B	ZNF138	DPH2	C10orf88
TUFT1	WDR17	CIT				PLD6	SYNJ2	PPP1R14A	TCAF2	ZFP57	PNP
FIG4	KLRK1	AL139424.2				DHH	BMP8A	ZNF431	OPRL1	ZNF334	RBM34
ZNF433-AS1	SLC49A3	GALNT14				ARVCF	ARRDC1-AS1	LINC01405	AC091563.1	EPB41	CDR2L
SLC17A9	ARNTL2	IL10				GAS8	PER3	ZXDB	ZBTB49	SOX6	U91328.1
HAUS1	F2RL1	AHCYL2				UBE2T	SLC20A2	PDE12	FAM131B	AMH	AC010980.1
CDKN2B-AS1	TTC39B	PRR11				SPRYD4	POF1B	SLC25A30	CTF1	BMP5	MED31
MNDA	RABL2B	ZNF627				ABCB10	ESRRA	IFNLR1	AC108463.3	SPAG1	CEP97
A1BG	PEX10	GSEC				ZNF800	TNRC6C	ARV1	AL513550.1	SPATC1L	ZNF569
SPAST	CDK3	SLC26A7				PPBP	SELENOK	LIPE	AC004812.2	LINC02432	VSIG10
STARD5	RGS14	ZNF334				ARFGEF3	TIMM8A	C2orf88	LINC01852	FGGY	REL
DTX2	MKI67	SPATA6				CACHD1	HERPUD2	AC036176.1	PNMA6A	JRK	SLC16A8
SPNS2	AC010198.2	AC009159.3				TMEM71	HDX	LINC00964	PRH1	AC093227.1	LAMC3
TMEM106A	CLEC4A	CCDC57				COL13A1	TUBA3D	JPH1	LINC01844	CXorf40B	FUZ
CDCP1	NDUFA6-DT	MINDY4				PIFO	CDS2	AC004148.1	ACSBG1	ZNF418	PPARG
RTL3	AC108075.1	IRF8				ANKDD1A	ZNF507	ANKRD39	SLAIN1	LINC02660	NRARP
TCF7	DPP4	TAGAP				CASC2	ICK	AC145285.2	ENAM	KLHL34	GALNT6
TTC21A	BANK1	SOX10				GARNL3	SETD1A	BMP7	ZNF341	PIWIL4	SKP2
SPACA9	CYP26B1	TMEM102				GRIK5	ESRRB	ZNF17	FGF10	SAPCD1-AS1	NFIA-AS2
LINC00339	SFRP5	FCGR1B				AC005037.1	MPP2	SERPINI1	EFCC1	EIF3CL	ANKRD23
TPST1	STK26	AL022328.4				PCP4	TMEM132B	PEX7	CLDND2	CBX8	IDNK
SNHG30	CLSTN3	INVS				MIR3936HG	CFAP70	AC055822.1	AL121832.2	NEDD1	CCL21
PAN3	ASTE1	AC009974.1				PINK1-AS	TWISTNB	SNAPC5	APOB	SLAIN1	CD48
AC110611.2	LCAT	SKAP1				AC016727.1	ZNF274	AC022034.3	LINC01137	PHF6	PIGBOS1
BLOC1S3	AC097534.2	DENND11				BLM	FAM47E	SLC25A33	IL1RAPL1	COL23A1	DET1
AC005393.1	ZNF446	CBLN3				MFSD4B	FJX1	AL354740.1	RBMS3-AS3	AC090348.1	AC008035.1
CLDN11	NLRC4	AL355488.1				EPB41L4A	SLC30A2	MROH8	AC078845.1	AC107959.1	NR3C2
SLC38A6	TMEM265	ZNF337				TRMT13	GLIS2-AS1	PCDHGA7	MSS51	ZNF236	FAM221A
TBX15	LINC01133	AC010618.3				TMEM117	ST6GALNAC1	MYOCD	ETV7	RCC1	CA2
LRRC8C-DT	SAMD11	AL445250.1				CCDC85A	UBAC1	MTRNR2L6	KLLN	AL137026.1	RALGPS2
HIST1H4J	NTM	MEG9				AC105271.1	SLC17A7	JPH2	FLT3	ASPG	AL096865.1
MYL5	MMP28	TMC8				ATP7B	APOO	PAK1IP1	HIST1H4E	CHKB-DT	ZNF816
GLIDR	ZNF304	THAP8				RARB	LINC00923	LRP8	FAM66B	TMC7	TTPAL
SYCE1L	CEP250	COL9A3				RTKN	KCNA4	Z99572.1	AC007686.3	LRRC23	MTHFSD
AC005076.1	MRI1	CCDC71				ZNF439	PPIL6	IDI2-AS1	PWWP3B	MYADML2	VPS13B-DT
PKP1	ITGB8	LIG1				CLDND2	AC080013.1	FCGR3B	EVC2	STXBP6	PUS10
WDR54	GSDME	PARP15				MAGOHB	TMEM177	STARD4	BATF2	AC079922.2	CABLES2
STEAP1	ANKDD1A	AP003307.1				C1QTNF1-AS1	IFI16	AC073896.2	RHEBL1	MTRNR2L4	ZNF442
SLC17A7	AL391422.4	RFX8				AC006480.2	SPTBN5	AC004982.1	AC009283.1	MGARP	PCCA-DT
CDC6	ZNF248	BMPER				NPIPB5	DXO	PPP1R3F	KY	AC002456.1	VAV1
POC1B-AS1	FOXRED1	PRG2				MAMSTR	TLL1	CEP104	PCP4	MEMO1	GPRASP1
AP004609.3	TBX15	GZMM				KIF9-AS1	NOXA1	TSLP	KIF24	BX664615.2	PTGR2
HRCT1	BACH2	C16orf46				SYDE2	APIP	AP003068.2	AMER1	RAB33A	PAXIP1
HDAC8	LRRC10B	GREB1				SLCO1C1	LARP1B	ELF3-AS1	XKR6	PLGLB1	DUSP19
SMAD9	ZNF138	HPSE				SLC2A1-AS1	CMSS1	GREB1L	AC009506.1	HSD11B1	FAM124A
C1QTNF9	GAL3ST4	ARHGEF4				SLC26A4	AC022034.3	RAB33A	LINC02018	C12orf54	NOL12
ZSWIM4	NCAM2	GSAP				HIST1H2BG	ZNF182	HOGA1	PNCK	AL645933.2	AC068473.5
NPFF	CADM3	ANKRD16				C19orf33	LAT	P2RY2	AC124016.1	AC074212.1	GLIDR
APOBEC3G	CLEC4E	PHGDH				AC025449.2	SRARP	GPR157	C1QTNF9	OVAAL	KCTD21
RPUSD1	ETNK2	CCDC151				CCDC40	SDK1	HDHD3	TUBA8	YY2	CXCL2
ZNF227	ZNF586	TAF4B				KIF5C	NOB1	AC007009.1	ST8SIA5	FNDC5	TNIK
LMO3	TSEN54	NR2F1-AS1				AL442125.1	MALSU1	MEOX1	AC135507.1	ABCD2	VSTM2L
BAIAP2-DT	PROK1	MC1R				ANGPTL5	BAIAP3	IL1RL1	PARD6A	PJVK	DNHD1
GPR171	CEP19	ADAMTS16				BBS7	AC004687.1	LINC00957	SEMA3B-AS1	FAM221A	PTGER3
PTCH2	PRC1	ZC3H12D				CHM	GNAQ	TRMT9B	AC008267.5	FAM131C	ASB11
PTPRO	CCDC170	MYMX				MAN1B1-DT	SLC25A45	AL731563.3	AC096992.2	SEPSECS	GAS6-DT
C1QTNF4	EPHB2	GPER1				GOLGA8N	CXorf40A	LRRC4	AC106738.1	SCOC-AS1	ZNF33B
TMEM225B	ZNF793	ARHGAP22				ARHGEF37	ALG10	CAV3	MATN3	ZSCAN31	ZNF615
SCAMP1-AS1	ZBTB24	SCARF2				DUSP8	GP1BA	SLC25A10	GPR85	ECT2L	CCR10
HID1	AC027682.6	NAALADL1				PCDHGA10	AL592424.1	CPAMD8	C20orf202	CDC6	LRIG3
TRIB3	IDNK	ASTN2				FOCAD-AS1	HAND2	LINC02208	TECTA	MAL	FAM83H
TRAF3IP3	ST20-AS1	ANKMY1				TBC1D8	AGAP2-AS1	AC011472.4	GLIPR1L2	TTC39A	TTC21B
ZNF816	TRAPPC10	DTL				HAND1	STAG3	CLEC5A	RANBP17	FAM227A	HDX
ATP6V1E2	PTGS2	ARSJ				FAM83F	CPNE4	FAM83F	AC007614.1	PINK1-AS	CEP290
FBXL19	WFDC1	PASK				CBARP	ZNF571-AS1	AL357079.2	CPLANE2	AL121601.1	PHKA1
NLN	CDRT4	GASK1A				AL080248.1	VAPB	PDCL3	AC024560.4	MPP2	LTN1
FP565260.1	HOXB6	EDN1				ZSCAN30	NEK7	LINC01880	PCDHGA2	RAC3	LINC02716
AC129507.1	CENPO	SDSL				LINC00327	STARD8	L1CAM	TMIE	CDCA2	TTLL11
PRXL2B	AC124016.2	LINC02298				EIF1B-AS1	ARL17A	AP002387.2	SLC25A25-AS1	ACAD10	TFPI2
RASGEF1B	ZNF782	CXCR3				PPFIA4	RAF1	RAP1GAP	ZNF227	ANAPC10	PRDM6
UBASH3B	LINC02482	P2RX7				HK2	TINAGL1	LCN10	CAV3	TBXA2R	CLEC12A
BHLHE22	ZBTB22	GPR65				CLCN2	GPR153	AP001439.1	NBPF11	KBTBD12	KCNE1
C12orf75	LIPG	CCDC152				MIR210HG	TIPARP-AS1	TTC39A	AC089985.1	SLN	TIGD6
OLMALINC	FCMR	CALHM6				AC007262.2	EIF4ENIF1	LNX1	SPTY2D1OS	ATP6V0E2-AS1	CAAP1
GCNT1	AC007877.1	ZNF814				LIN9	GCLM	NRTN	GPRIN1	AC005076.1	MYADML2
TMEM86A	TRMT10B	STK32C				GRB14	CD300LG	AL359715.1	FAM53B-AS1	HDAC8	SLCO4A1
GLB1L	MRO	MIR1915HG				INO80D	C12orf43	MAEL	CA5B	SH2D2A	PHRF1
ENPP2	KIF7	PIM2				INPP5J	GALNT18	WDR62	PRDM16-DT	FAN1	FAM161B
NUP210	LINC02611	AL135999.1				ZNF222	ORC4	ZNF418	AL354920.1	KCNK1	RMND1
CHST6	NXPH3	PAFAH1B3				SLC9A8	MTHFR	KCNE1B	TGFB2	PTGIR	ADPRH
OPRL1	CCHCR1	AC119403.1				KCNQ1OT1	GNG11	AC126755.2	LINC00482	GRB14	MPP7
AC016876.1	CD28	TIMELESS				COL4A6	SNTA1	AC022784.1	CYB561D2.1	AC006942.1	AC097359.2
HGF	AC027097.1	ZNF843				NRL	CRTC1	AGAP2	FSBP	DGKI	ZNF789
PIGA	CACNB3	ACTR3B				FLG-AS1	HIST1H2BJ	LINC02489	TMEM240	NACA2	GLDN
HS3ST1	PCED1B-AS1	TRIM34				AL139246.5	TNFRSF10C	AC002546.1	C11orf80	AURKA	ARHGAP28
COL28A1	PSTPIP2	ASB16-AS1				L2HGDH	ZMYM1	RIIAD1	AC010245.2	TFB1M	IPCEF1
SYTL3	AC139768.1	BEND6				AC005498.2	DNAJB9	CLP1	AP002761.4	ATXN7	ASPM
EDA2R	PIGW	SHROOM1				GABRB1	GSAP	CHADL	AK8	C2CD6	ITGB1BP2
TBC1D10C	CHAF1A	FOXP2				SASS6	AC007126.1	DKK1	HLF	MED9	ZNF500
ADRA1B	WDFY4	FMN1				CADM4	AP000873.2	ZEB2-AS1	AC004918.4	FKTN	PTH1R
KRT18	ATG16L2	AC009093.1				CRACR2A	AP002387.2	NR3C2	DGKB	GLIS1	AC093157.1
CTPS1	AC083799.1	ADAMTS13				AC040174.1	SPX	KDM4D	AP003469.4	RNF43	CNTFR
ZNF836	IGSF10	TPRG1				MTTP	KLHDC1	LINC00923	PTPRR	SMIM10L2B	LEP
AC011407.1	FGF13	LINC00863				EIF3J-DT	TESC	IGSF11	NMNAT3	ZNF205	PRKCE
PVT1	ZKSCAN7	ZMYND15				ZNF233	DUSP28	SYN1	NUDT10	REP15	GZMA
KATNB1	ARID3B	PRR3				MAGI3	AC009118.3	ASB10	ZNF287	C16orf46	SYDE2
FOXRED2	DGAT2	HECTD2				ETFBKMT	SPSB4	AC090348.1	TMC7	ZNF564	CENPW
TANGO6	CTPS1	ZSCAN32				AC009283.1	SIX2	NPTN-IT1	EPHX3	AC092164.1	B4GALT1-AS1
CD300A	STAT4	LINC02591				TAS1R3	CRISP3	LINC02478	BX470102.2	DBNDD1	SLC30A2
CHEK2	PLPP2	BORA				PON3	ZNF565	AMN1	ZNF554	BAIAP3	ARL5B
NOP2	REEP4	ROM1				RABGAP1L-IT1	STRIP1	CHMP4C	LINC01357	AC007405.3	LINC01460
ADH1C	GAPLINC	LCK				GAN	EXOG	NT5M	AC004839.2	CSRNP3	NCAPG2
VAT1L	AL035446.1	KIAA0408				TTI1	ATP11A	AL133353.1	PCDHB10	MTRNR2L6	ZNF727
Z69706.1	AC093843.2	ARL9				TMEM74	B3GLCT	TMEM17	LYPD3	NBPF10	SRBD1
HNF1A-AS1	TMCO6	CEBPA				PTGDR	ZNF487	ZNF536	CCNJL	LSR	RFX2
SIRPB2	H2AFY2	PTPRO				EGR2	ALPK3	TWISTNB	MYBPC1	PCDHB4	ZFP2
WDFY4	PABPC1L	NPIPA3				LRRC69	FUT10	C2CD4C	AL590999.1	PRR16	ZNF407
DLGAP3	TRPM2	PI15				AC027807.2	EBI3	AL158038.1	SIT1	EML1	ZC3HC1
IL6	ZNHIT2	PBLD				TMEM200C	AL118516.1	AC098617.1	CCDC30	CENPL	TMEM132C
USP35	UNC13D	FAIM2				STIM2	LAP3	PITX3	IER3-AS1	Z99572.1	PCSK2
CCDC88C	PLPPR4	LAMC3				AL078590.2	SLC25A10	PTGR2	SMIM10L2B	TUB	AMACR
HIST2H2AA4	ST14	AC025171.4				ACTRT3	GPR89B	CA14	GDPD1	IRX4	RHOF
P2RY6	ZNF575	AL035681.1				ZNF141	MEMO1	FOSL1	OVGP1	ZNF346	FAM71D
TAF1A	CD3E	LRRC3				CLEC1A	ACAD10	DNAJC6	AC067750.1	EXTL1	SLC25A51
AL121832.2	SH2D4A	AC110597.1				WNT6	FRY	AC004816.1	OVCH1-AS1	NAP1L2	SLC17A9
CD72	RXRG	MZB1				C1orf74	DDX31	PPBP	AC016590.3	ST8SIA1	CMTM5
INVS	AC026401.3	AC005670.3				TUBAL3	MOCS3	AL512625.1	MGAT4C	C11orf91	ALKBH1
AC002546.1	BCL2L11	DLX5				AC007405.3	ZCRB1	ENAM	AC107021.2	PDIK1L	GTPBP10
POLD1	NDOR1	NBPF11				NIPSNAP3B	FYB1	BTBD9	AC104506.1	TRIP4	SLC25A33
VWA5A	DNALI1	NCAPG				KRBA1	GIMAP6	LINC02269	ASH1L-AS1	ETNK2	SLC38A3
PROSER2	BBS9	FAM110A				WFDC1	GBA2	C11orf98	AC083862.3	INTS6L	AC016957.2
MBTD1	LINC01963	RNFT2				AC006333.2	ALOX12-AS1	MTFR1	EPB41L4B	CORIN	DBF4
STAC	CA5B	ASGR1				RHAG	MTMR3	AC100803.4	ZNF433	CHRNE	GINS2
MDFI	NBR2	IER3-AS1				RSAD2	AC027449.1	MAMDC4	AL590004.3	TTC33	ZNF530
TRIM73	LRMP	AC099791.2				CEP192	NDE1	AL133395.1	AC125807.2	ZNF555	NLN
LINC00861	ZNF835	LINGO1				B4GALNT3	CCDC184	AC090772.3	HOXA3	AC018647.2	CAV3
SEPTIN1	WSCD1	COL4A3				SLC25A29	TBC1D4	TDGF1	DDN	DUSP15	MYCL
SLC37A1	TMEM231	ZNF70				AL033384.1	CFI	ALDH1L1-AS2	TREML1	MYOZ3	AL355001.2
SHOX2	KIAA1614	PTPRD-AS1				R3HCC1L	CLCN3	SUSD4	STIM2-AS1	MXD3	BATF
EPB41L4A-DT	SUPT3H	LINC02202				PCSK2	PSMA3	TTC30A	AL080317.2	SHLD3	SLC16A1-AS1
RIPOR2	AC139887.2	LINC01750				TIGD1	STXBP6	WNT6	AC007216.3	RAI2	GZMK
LINC00665	FOXN3-AS1	DEPDC7				ASB10	PSME4	RAB3A	C17orf82	TMEM177	AGPAT4
TMEM102	XYLB	DHX34				MAPT	NINL	AC027117.1	GDF7	CLYBL	SARDH
AC244090.1	LINC01091	AOX1				RAPGEF4	ZNF385B	ZNF585A	SCNN1D	LINC02245	GRAMD1B
VWCE	SETD9	TIGD6				STARD9	PRNCR1	ZDHHC21	AC023509.3	AC009812.1	BCL11B
KYNU	SPA17	NFKBID				ZMYND12	MSS51	AC114811.2	POLN	SUV39H2	PLAAT1
ZNF584	CNBD2	KCNE5				P2RX5	SLC26A6	DLEU1	IL12RB2	ZNF345	NUDT17
SSH3	GPR65	C8orf31				SFRP2	AC027644.3	BCDIN3D-AS1	C19orf81	AC027130.1	E2F3
LINC02591	FAM161B	GAS2L3				AC105446.1	DNAJB2	AL139011.1	AC107375.1	ST8SIA2	CTXND1
ITGA10	P3H2	NKD2				ACAD8	DGKH	HAUS3	AC022007.1	ATG2B	NEMP2
ZDHHC1	SEMA4F	IRF5				FOXM1	DAB2IP	FZD6	AL359513.1	TSLP	PLEK
TRG-AS1	MC1R	CXCL9				AK9	ZNF808	AC040174.2	LINC00115	EXD3	PLIN1
RASL11B	F10	S100B				ZNF174	RPP14	PWWP3B	MAPK8IP2	CMTM4	CCM2L
OPHN1	AC025171.1	SUSD1				MAP9	INTS6	CDKL5	HMGA2	PPP1R9A	GGACT
CXorf38	ADGRE2	LINC01569				SDK1	HIC2	TNFSF9	SLC38A11	ZNF667-AS1	ZNF595
KLRK1	NBPF1	FCHSD1				GUCA1B	PRMT9	ALOX5AP	GPD1	ADAMTSL5	DYNC2H1
AC245297.2	IL2RB	ARHGEF19				ZNF236	SUCLG2	CST6	N4BP2L2-IT2	LIF	ZNF100
COPG2	MYO7A	C16orf54				CDK19	CMBL	SLC14A1	SCN4A	AC005562.1	SCNN1D
ZNF101	KLHDC4	LAT				AC009509.4	WWP1	ZNF226	FAM227B	CEP57L1	ZNF473
ZNF777	ZNF473	RCC1				ITPKA	OSBPL1A	ASPG	AC016650.1	POLR3A	ZNF563
CRABP2	MYH3	AP001347.1				HJV	MEOX1	ZP1	GPR137C	ARHGEF28	RRM2
FBP1	LINGO1	SLC4A11				WDR62	LINC02615	IGSF3	ZSCAN22	CASP6	CCNA1
LRIG3	TMEM268	MELTF-AS1				AL049840.5	MSI1	AC026748.3	AL596244.1	CAHM	VANGL2
TMEM81	AP000240.1	DUSP4				RADX	TRPV4	LRRC20	PLPP2	C19orf18	ASIC1
PRR7	COLGALT2	GRAMD1C				PCGF6	MAPK8IP3	UBR5-AS1	CD247	AC103691.1	PCDHB11
GALNT6	GRAP2	LHX6				MAPKBP1	NFATC2	AC007877.1	MAP3K2-DT	AC125807.2	TRIM7
LILRB1	SARS2	AC026979.2				PEX3	RORC	ZNF233	LINC01534	SLC29A2	AC009275.1
PRSS36	HES6	PROCA1				AP001160.3	PCID2	AMY2B	ARG1	ARHGAP44	MED7
PTGER2	ADAM19	AC064853.1				AC012101.2	CES2	LINC00632	AC093525.6	ASXL3	SLC44A3
CAPN11	C14orf132	ZC3H12B				S100A12	INPP5E	MAFIP	VPS13B-DT	LINC01550	TRPV4
PODXL2	PECR	DRD4				PSPH	ZC3H12C	GLIPR1L2	AC007390.2	MAP3K2-DT	METTL25
SLC49A3	CMTM2	HIST1H2AG				PPFIA3	AC093525.4	RGS9BP	PLA1A	ACOT1	YEATS4
AC006449.2	ARMC2	GAS6-DT				STRIP2	EFHD1	AL391684.1	FAM227A	NME5	SLC25A25-AS1
GALNT5	PYCR3	PELI3				MC1R	LMLN	GLP1R	ARC	KCNA5	FAM124B
CCDC125	ATP2B1-AS1	EFNA3				MRO	BCKDHA	ASB18	CD6	PRR3	LRRC3
TOP3A	RUNX3	SLC66A1L				RTCA-AS1	SGTA	CATSPERG	TRPC4	AL136454.1	TNFRSF11A
LILRA2	AP001330.4	YJEFN3				C1orf131	TJP2	HBD	ADAMTS19	PRTFDC1	AC099508.1
PDCD2L	C12orf60	FCER1A				LINC02716	ETFDH	RASGRF2-AS1	SILC1	AC245407.2	GREM1
ZC3H12A	CCT6B	NPW				MIPOL1	NUP85	CXCL8	TAF1A-AS1	ZNF23	HHIPL1
NKD2	CLCN2	ZNF674				FAM169A	SNRK	SRPK3	AC015912.3	BCL11A	RAD51D
ZNF814	AL391807.1	LRRN4CL				KYAT1	KIF5B	BLZF1	AC011330.2	AC123768.4	ZNF528-AS1
GPR137C	TIRAP	AC027097.1				SPRY3	AC010894.2	FGF18	COL9A1	AL359504.2	IL3RA
PKNOX2	ACKR4	TRAM1L1				AL022311.1	C2orf76	ZNF778	MT3	NANOS1	AC125494.2
AMPD3	ATP10A	TCF7				MAP3K2-DT	TEX30	AC124016.1	AL031432.4	CACFD1	CEP152
SLC37A2	AC119674.1	PRR22				CBWD2	KLHL7	HSD17B8	AC006547.3	CASQ1	ARRDC4
TRIM14	ARL6	GFRA2				OGDHL	SLC22A5	CAAP1	TNNI1	SLC35F2	TRIP13
AIFM3	THY1	AL122125.1				TPD52	TTN-AS1	MPP2	AL035681.1	AL590062.1	CABLES1
ZSCAN25	RNF215	HTR2B				COX10-AS1	UQCRC1	AL357140.2	AC004241.3	ZNF41	NOS3
TRPV3	LINC01871	CDCP1				NTRK3	MTRNR2L10	ATP6V1FNB	KCNQ2	APOB	TMC4
BTN2A2	CUBN	AC008555.4				EPHA7	AGO2	CDCA2	COL10A1	RTN4IP1	DPH5
ZNF517	ZSCAN29	TC2N				CPEB1	MTTP	AL355312.4	CCDC154	ARHGDIG	FIGNL1
C5	INHBA	HOXD-AS2				AC124852.1	SLC25A33	AL354920.1	KCNE5	EFCAB7	HCN2
TRMT12	ABCA7	BRCA2				NPTN-IT1	AC008014.1	NCAPD3	ZXDA	CCDC181	NRG1
ZNF180	AC006059.1	IL1RL2				FBXL2	ST8SIA5	AP002360.1	LSMEM1	PSMC3IP	Z69706.1
VMO1	PMM2	AP000919.4				STRIT1	SYCP2	C4orf54	AC011407.1	ZNF774	GTPBP8
AC022706.1	AC099343.3	ASPHD2				PLS1	LURAP1	KCNRG	RAPSN	GPBAR1	AC025183.1
CCL21	CENPW	CCNA2				OXSM	ASTN1	LINC01460	LINC00920	ANGEL1	AL513217.1
DPP4	ZNF561-AS1	CA12				LINC02767	PARVB	AC124947.1	AC108471.2	LERFS	HCN4
AC007406.5	TMEM198	GEMIN2				IGSF11	AC021054.1	AC123912.4	AC005726.3	MSI1	TAF5
MMP28	ASB16-AS1	AC015712.2				CAMK2A	MDGA1	ARFGEF3	PTGER1	KIF23	PVT1
TMEM240	TRPC6	BRICD5				RELN	AC087457.1	AC005498.2	ZNF804A	TMEM147-AS1	ZNF813
FUT4	CCL23	CORO2A				AC009118.3	TCEA3	DAND5	AL603839.3	LAMB3	SYCP2
ZNF2	AC040169.1	GRIN2D				MGAT4C	CDK17	HCN2	AP001347.1	AC005498.2	ZWINT
SNHG10	SPAG5	SRGAP3				GJA3	CCDC120	PXN-AS1	TFAP4	KATNB1	PRMT9
AL132709.8	AC022706.1	OXER1				ERC2	NEK9	AL596202.1	AC010531.6	UBL7-AS1	NUDT7
SULT1A2	MKS1	CENPE				FBXO6	PLXNA3	AC067852.5	AL356488.3	AL691432.2	KCNIP2
SIRPB1	NKX3-1	AC019257.1				RTN4RL1	FBXO31	DCLK2	CD177	THAP2	RTL10
SHPK	HPD	TRIM73				LRRC14B	KDM6B	BSPRY	NRN1L	BBS1	COX19
SLC1A7	RACGAP1	TIAM1				PNMT	LINC01235	HJV	CYTL1	AC007325.2	TRIM39
AC092384.1	ZNF443	CELF6				USP49	CCSER1	HLF	CDH15	NDE1	LIAS
FREM1	AL121944.1	ST7-AS1				CHST9	GOLGA6L9	AL121906.2	LINC02009	GPR132	IRX6
ACCS	GREM1	AC073111.4				MMP25-AS1	PNP	TMEM40	GUCA1C	EMX2OS	APOBEC3D
ZNF486	ARHGAP11A	CCDC40				EID3	NQO1	CNBD2	AC027020.2	DHODH	ZNF8
DDX11	AC011043.1	QRICH2				AP000704.1	REV1	GALE	AC002467.1	AP000766.1	AL513487.1
SV2B	FAM71D	IL18				OSBP2	ETAA1	RFC5	BSN	GDNF	MAPK4
HOTAIRM1	SHF	LINC01144				PCDHB5	PEX12	EXOC6	C5AR2	CLIC3	ENTPD1-AS1
ZNF786	GPD1	AC019131.2				LINC00923	GPRC5B	LRRC73	AC008063.1	KIF26B	TIMM8A
TMEM200B	CIDEB	CCDC180				KLKB1	CACNB2	AL162431.1	BAIAP2L1	ZNF195	SNHG26
HAUS8	ANKRD10-IT1	C1QTNF3				DNAAF4	AL162171.3	SAMD10	ADAMTS3	FAM86C1	NGF
RARA-AS1	FGD1	C14orf93				AL162458.1	AL162231.1	S100A14	AL355312.4	AC005332.3	GPR35
AC009951.6	SAMD10	ST3GAL5				PAK6	ASCC1	AC015845.2	AC104211.1	CRAMP1	PRSS53
TRPV4	Z93930.2	LINC01048				SPATA24	ZNF597	AC016650.1	ZNF324B	RBKS	CELSR2
DENND1C	H1FX-AS1	RENBP				Z95115.1	ETS1	AL662844.4	NDNF	LPAR3	CEP295
DBF4	SLC25A35	HAUS5				ZNF587	MAPK1	LINC01170	KCNK15-AS1	TSNARE1	SLC2A6
AC135507.1	TRIM66	HYAL3				LINC02256	L3MBTL4	TPPP	AC121247.1	THAP10	PRELID2
SCARF2	SYN2	THPO				WWOX	FXYD6	AC002467.1	TMEM200C	FGF13	PIWIL4
RASGRP1	GNB1L	TBKBP1				HPGD	GET4	AC007325.4	DND1	AP002387.2	MGME1
ATAT1	ARMCX5-GPRASP2	LINC02246				GNG8	CACYBP	ZNF543	OGDHL	AL136962.1	ZNF443
ZNF510	SLC45A1	ABCC2				AL590999.1	C15orf65	AC079610.1	RND2	PLEKHG4	ZNF790
ADPRM	VPS33B	SNX31				SLC45A1	DDX10	AC061992.2	NANOS3	UMODL1-AS1	CCL4
VASH1-AS1	KATNB1	CNTRL				CEP57L1	AC007878.1	ZNF630	AC005291.1	SOS1-IT1	ZNF554
TMEM233	GRIN2C	AL441992.1				RAG1	SNHG12	EPM2A	LINC02593	ZNF853	ARSG
ZNF175	SCARF2	CXCL3				AL117336.2	PRIM1	METTL18	AC006033.2	NAP1L3	GCH1
GRAP	LRRC37A3	TNFRSF10D				AC119673.2	KLF7	AL121655.1	TSPOAP1-AS1	CLHC1	ZNF391
TET3	SPESP1	PCBP3				GATA2-AS1	SIN3B	AC007383.2	GLIS2-AS1	AC068700.1	MOSPD1
NCS1	SORCS2	AC004846.1				EPB41L4B	DOK7	AL023553.1	CYP1B1-AS1	C8orf49	SLC45A3
TMEM220	ZNF439	AC009509.1				ZSCAN16	MYLPF	AP005329.3	CD3D	SP6	DNAJC6
SOCS1	HLCS	PARD6G				LINC01505	DDO	AL354696.2	MST1R	SPDL1	SLC25A35
SH2B2	HIST1H4J	SEC16B				ALKBH2	TLN2	NRG2	LINC02767	PLEKHB1	MCM9
HR	C16orf86	LINC02611				PPM1J	AC021097.1	TRIM7	FERMT1	SRP14-AS1	CARD11
EFS	HBG2	TDO2				POU5F2	ZNF141	AC138904.3	REP15	B3GNTL1	AC027575.2
CDKL1	AC015871.4	ANKAR				AL139260.1	CAMSAP1	SLC4A1	ATP6V1C2	BHMT2	PEX11G
GPR132	AP001062.1	RSPH9				AC005041.4	LYAR	CIDEB	NUAK2	IQCJ-SCHIP1	LRRC34
CCDC17	ZNF341	SIX4				ZNF784	TBC1D25	FBLL1	ATP1A1-AS1	L2HGDH	CWC25
KIF7	NR2F1	FXYD2				SPIN4	RARS	HOXA3	EPCAM-DT	ADORA2A	PCDHB15
CASP8	MAMSTR	CD40LG				AC016831.1	MAP7D1	RNGTT	LINC01547	PTPN5	ST3GAL5
AC018755.4	LRRN2	MAP3K2-DT				ZBED8	CD79B	PCDHGB6	AC147651.1	MAGIX	ADIPOQ
AL355001.2	GLI3	TRIM39				HDX	LINC02762	MT1F	AL450998.2	SYN2	KRIT1
TRAF4	DDX47	AP006621.3				SHLD3	SCNN1D	CD3EAP	BMP7	ZNF491	CSF2RB
ABCA7	SCN3B	TCFL5				FAM228A	CHMP2B	TMEM9B-AS1	GPR20	LUCAT1	KPTN
ZNF628	SLC19A3	LMO3				AC138649.1	SEMA6B	AC009570.1	PACSIN1	ANGPTL7	AC064807.1
AC083798.2	EFCC1	APBA2				ADORA1	CYP4B1	AP000704.1	SIRPB2	ADAM28	SENP8
URB2	A1BG-AS1	LINC02193				HS6ST3	TNFSF14	AC124242.1	AC022893.1	ERCC8	RFC3
NBPF11	UBE2D3-AS1	ADAMTS9-AS2				STUM	ARHGEF18	FAM222A	TRBC1	ZNF772	IQCC
ABRAXAS1	GSTM5	CDKN2A				KLHDC1	TLCD4	NKIRAS1	AC005498.2	PPM1J	ADRA2C
ZNF761	AL117336.2	ATXN7L2				TIAF1	ACSL3	AP001065.3	SEZ6L	BAALC	ADAMTS13
DONSON	SHROOM2	RNASEH2A				PNMA8A	FITM2	CNTN3	SFN	WNT9A	ZBTB49
ZNF473	NEB	CD38				MAGEE1	TRMT13	STC1	WNT3	SLC2A11	ARF4-AS1
ADAM8	ZNF70	AC024337.2				AP5B1	DCAF12	AC103591.3	FAM27E3	ZKSCAN7	GUCA1B
CHEK1	ROM1	LINC01106				OSGEPL1	HDAC4	HOOK1	AC023632.2	MPV17L2	RMC1
CYB5R2	STAC3	AL118522.1				PPP2R2C	LSM1	SCN2A	KCP	CHIC1	WDR62
GSDMB	STXBP5-AS1	ELF4				TMEM44	DNAH1	PPP1R3D	PCDHB3	ZNF469	TRMT9B
FMO1	ETV2	UFSP1				ZDHHC11B	FAM114A2	ZBTB11-AS1	SMIM10L2A	LRWD1	SERHL2
AC139768.1	UFSP1	HNRNPA1L2				AL390242.1	CEP290	ABCD2	AL136084.3	LTF	CD7
TOR2A	AL691432.2	PON3				GALNT4	MVB12B	AC090515.2	AC020594.1	BX322562.1	N4BP3
MEF2B	CCL8	RET				ZNF254	ANKRD37	FGF1	SCIN	AC027601.4	LINC00324
BTK	KIAA1755	KRT7				ADAM22	HLF	AC104506.1	BEND3	MYBPC1	DPF3
ZNF283	EFNA3	CCNT2-AS1				SEZ6L	SDCBP2-AS1	DUSP19	AP003352.1	ZFP1	AC005498.3
RGS16	LLGL1	AC008771.1				KIAA0895	UHRF1BP1	AC009171.2	SLITRK6	BMP8A	ZNF112
CYP26B1	EPS8L2	XPNPEP2				GMEB2	TMEM102	KLHL13	AC083880.1	PRR22	SKIDA1
MMP25	ZNF891	AL359555.4				EPOP	VPS50	SLC25A53	AL354836.1	SEMA3B-AS1	AURKA
LINC01023	TSNARE1	CHAF1B				CHL1	SLC2A1	AP000766.1	KIAA1210	GLIS2-AS1	RACGAP1
RAB43	PNMA8A	NBPF12				AC021092.1	SMC1A	COL13A1	LINC01063	DDX43	ELMO3
FAM225A	MIR503HG	TCEAL7				ZNHIT2	SHROOM4	SHC4	Z92544.2	RAB17	AZIN1-AS1
LINC01679	ZNF77	KIAA1328				RIIAD1	FANCI	LTB4R2	CD8B	ZNF763	AC100803.4
OXT	AP001160.3	SCIMP				ALG14	AC012615.1	RTL3	ADORA1	LRRC37B	SLC24A2
ETV2	EXOC3-AS1	LCA5				KLHL25	LINC00654	AL133410.1	PDE6G	AL158071.1	B4GALNT4
RAB42	MIR1915HG	ZNF829				AC010976.2	GRIPAP1	LANCL3	ABCB4	EIF3C	NHS
TLR7	AC008555.4	AKR7A3				TBC1D24	MIPEP	AC130324.1	SLC16A12-AS1	AL109615.4	DLEU1
GBP5	CDK20	MBNL3				ZNF528-AS1	IWS1	AC027130.1	BEX1	FAM71F2	PLLP
MHENCR	SUCLG2-AS1	CKAP2L				ZNRF3	PLCG2	AL732509.1	LINC02591	EYA4	TTYH1
GRAP2	HHAT	ZNF710				ETNPPL	HARS2	PACRG	AC068205.2	MCM4	NEB
MIR503HG	MAFG-DT	PRNCR1				AC068733.3	EMC1-AS1	ZNF460	LNP1	AC242426.2	SERPINB8
TNK1	SLN	ARHGAP11A				ZNF565	TMEM106A	RBPMS-AS1	MMP25-AS1	AC022034.1	PIM2
LILRA6	AC018638.6	ZNF85				AC010894.2	FIGN	AL352979.4	AC025165.5	MEF2B	PRX
AC005944.1	PRDM8	AC096708.3				SLC2A6	UGCG	AC024610.2	AP000254.2	PRSS53	PIGV
AC142472.1		SH2D2A				AC008555.4	L3MBTL1	C10orf71-AS1	AC068338.3	TBC1D8	PPL
ZNF616		BCL11B				ZFP92	NMNAT2	RPP38-DT	AC022762.2	ST6GALNAC1	UNC13D
EDRF1-DT		LINC01315				RACGAP1	SLC19A2	AL022345.4	LINC02388	AC009318.4	RIMKLA
AC073111.4		MS4A4E				SLC44A3	EBAG9	ESRRB	SERF1A	MAJIN	EDA
AL109811.2		PLB1				LINC01415	HELZ	AC016924.1	AC135803.1	AC107027.3	SCML4
AC022098.1		TYRO3				TMEM161B	TPD52	C3orf33	GPR19	METTL25	ZNF600
LINC02611		TAL1				IL1R2	AC027279.1	SPDYE16	ZNF501	SLC4A1	SPOCK2
ZNF781		TIGIT				CHN2	DAGLA	AC007066.2	TM6SF2	AP002761.4	FAM198B-AS1
AL391834.2		RAB42				ZNF471	RB1CC1	XRCC2	ADAM28	AC237221.1	DAPK2
PECR		FAM198B-AS1				FAM153A	LINC00886	SCUBE1	DISP2	BRSK1	ZNF710
RGS1		KHDC1				ZNF852	GPATCH1	MCEMP1	PARTICL	SEMA6D	PIK3CG
MMP17		SLC6A16				FBXO36	KPNB1	AC024361.1	ZNF236-DT	PTCD2	AL355596.1
ZNF26		CD72				AMER1	SOX7	PANK1	DRC3	DHX35	ENAM
ARMC9		ECEL1				OXNAD1	PITPNA	AC131902.1	AC004982.2	AF131215.6	CHODL
TCTEX1D1		CD5				USP3-AS1	CHSY3	AL132765.2	AC005921.2	RIC3	PTPRZ1
ZNF567		C5orf58				HULC	SILC1	CHGB	CES4A	LINC01697	TRIM45
MAGIX		ZNF300				AC087457.1	AGAP9	NUP50-DT	AC112220.2	AC091607.2	ZNF541
RECQL4		MEX3A				TDRD6	ZNF219	GMNC	ZNF737	CBX2	AC097376.3
AC009509.1		AC027279.1				KLHL35	FAM102B	ARC	ELFN1	LINC02608	ZSCAN32
EXOC3L2		ZNF699				KL	HCN2	APOA1	ADAMDEC1	ZNF781	SOX9-AS1
PRRG4		NETO2				MNS1	PUM2	PI16	TRPA1	SLC26A10	NEU3
ZNF790		CDK20				PUS10	TENT4B	AC090004.2	IGSF5	ATP8B3	SCAI
SLC19A3		AC011468.1				HYDIN	CCDC88C	CYP4F12	NR5A2	RGN	AL135910.1
ERICH5		MORN3				SLC38A3	CEP135	UBE2Q2L	ZNF782	SERP2	SAMD3
SEC14L2		EVC2				AC096642.1	ARMC7	FAM124A	TRIM73	KBTBD8	CENPO
FBXO10		CNIH3				AC016924.1	PPP1R13L	CP	MED14OS	MIR4453HG	ZNF684
LIG1		WFDC1				AC007114.2	NT5M	BDNF	LINC02615	HHAT	SHC4
ENTPD3		SLC26A10				LRRC8B	NMNAT3	IRX4	GZMK	AC007541.1	ZNF670
AC009309.1		ZNF225				LAMA5-AS1	TCP11L2	PPP1R26	TCP10L	PTHLH	FPR1
AL365203.2		DENND1C				AL158071.1	NDUFS3	MTHFD2L	TDO2	ADORA2B	URB2
AC008915.2		P2RY13				FGFR3	GOLGB1	UGT2B4	AL391840.3	C1QTNF9	BX890604.2
C4orf54		ZFP30				DTWD2	MAP10	AC068338.3	AL162424.1	NTN1	C1QTNF9
LCMT1-AS1		WARS2-AS1				TPCN2	GAN	AL109628.2	LINC01151	NXPH3	TLCD1
ZSWIM3		AC093297.2				ZNF367	KCNJ2	AC002398.2	AL355596.2	AC010976.2	TPO
ZNF341		ZNF490				AL031587.3	NECAB3	TINCR	LINC00894	SRD5A1	PCDHB10
ACRBP		LRRC27				SIRT4	SLC12A2	AC009318.2	LINC01358	LSMEM1	ZNF658
RHEBL1		ARHGAP20				SLC10A7	ASRGL1	CTXND1	DPH6-DT	GFRA3	SLC24A3
LRMP		ARHGEF5				ZNF658	FAM229A	AC105094.2	KLKB1	C4orf33	BACE1-AS
AC023043.1		ZNF888				ZNF280C	CEP83	CATSPER3	CFAP45	PXN-AS1	RAPSN
NOP14-AS1		SULT1A2				ZNF100	GTF3C3	PAQR9-AS1	AC069547.2	TTC9	OPRL1
PROM2		B4GALNT4				KCNN2	CACNA1C	PLCXD2	TMEM191B	FLVCR1-DT	PIGW
HOXB4		AC073349.1				AC009318.1	SOGA1	AC024257.4	RNF139-AS1	ZBTB49	ZNF101
ELF4		TANGO6				ZNF541	IL1RAPL1	PRG4	KIF19	WDR90	PTPN22
AC211476.6		KIF20A				AL390755.1	GORAB	AC092687.3	AP003120.1	HOXB3	AC009318.2
PTPRD-AS1		IL18R1				BMP7	MAP3K7	F5	TLE6	PRG4	AC019205.1
NR2F1-AS1		MOCOS				AC011477.2	AL117332.1	AL450998.2	ATP8A2	IFT140	EYA4
CCDC146		GSTM5				LINC00920	RAD23A	AC026202.2	AC092376.2	AC089985.1	FAM215B
AC105942.1		AC107294.2				CEACAM19	JMJD6	SYT13	FAM47E	CCND2-AS1	AL031651.2
RHOH		APBA1				WSCD1	PIGF	C15orf48	NAP1L3	SWSAP1	AADAT
TICAM1		AL591895.1				ANO8	TCN1	CENPV	MARVELD2	SYT15	ZNF529-AS1
AC011462.5		RABL2A				PPIL6	SUSD6	AC121761.1	LRRC6	FBXO16	KCTD21-AS1
KLHDC4		AC019171.1				ANKS1B	FBXL17	OXCT2	SND1-IT1	ZWINT	ITGB7
DEFA3		ANKRD24				GDPGP1	PLA1A	CLEC4E	DOCK9-DT	PTGER3	ABHD3
TAF1B		ETNK2				ZNF132	VPS37A	ILDR2	ADNP-AS1	AC007009.1	ZNF888
MIR34AHG		AL162424.1				ZNF571-AS1	CAMK2A	CA9	HCN3	TDRKH	ZWILCH
CCDC30		ZSCAN25				ITGB1-DT	CHD1	CAMK2A	PGM5P4-AS1	AC090409.1	LINC02245
IL2RA		RYR3				ZKSCAN5	BVES-AS1	ARHGAP5-AS1	AC005674.2	ZNF461	ZNF439
FOXF1		TFEC				PCDHGB6	AP4S1	GRHL1	AC079174.2	PRIM2	SSC4D
CCNJ		AL139099.1				ZNF418	ZNF816	AL357146.1	AC027807.2	PECR	AC124798.1
AC010969.2		GJD3				REP15	SH2D3C	AC007906.2	SRCIN1	HPR	PRPF18
AC012640.2		SLC16A4				AC087588.2	WDR31	ELOVL7	C17orf53	TCEANC	SFRP5
NIFK-AS1		NBPF14				ST8SIA2	LIMCH1	SETD9	AC009126.1	CEACAM1	TMEM79
GINS3		FAM182A				WDCP	TBC1D31	VEGFD	AC012433.2	AC003102.1	RNFT2
LRRC24		CCL23				ZSCAN9	AC012306.3	AC010624.5	AP005482.3	PVT1	AL049840.6
MIR9-3HG		KIF4A				ZBTB11-AS1	LTB4R	IQCH	AL606834.1	CTSG	TTC21A
PTGFR		SGMS1-AS1				REL	ITGB3	SPINK1	AP001107.9	CALML4	AC106897.1
VENTX		LINC00861				ZNF16	RANBP2	CXCR2	CYP4F12	MMP25	PSMC3IP
AC004687.1		AL139089.1				NECAB1	RHOF	LINC02660	PTGDR	PCDHB12	LRRC38
CCDC136		GINS1				POLR1E	RPRD1B	THAP9	AL021392.1	SNHG21	TEDC1
RENBP		FREM1				ARMC2	CFAP20	PF4	AC079848.1	PCDH20	LAMC2
SPATA2L		NAALAD2				GSTCD	TMEM234	AL450270.1	ELMOD1	CCL19	LINC01354
PRRT3		TLR5				MST1R	SDR39U1	DENND6A-AS1	AC020922.2	SPA17	SUSD5
SLPI		AC245297.3				NAIF1	NCEH1	AC012358.3	SMIM17	KCND2	GAPLINC
SLC2A5		COL25A1				F5	SRSF4	AC114316.1	ICAM4	GNAZ	MPV17L
TLCD1		AKAP3				AC011346.1	FGD6	ERBB4	FAM71F2	ZNF674-AS1	LAD1
LRTOMT		ALOX15B				SPA17	XIST	AC009318.1	GOLGA6L9	NUDT13	HMGN3-AS1
FAAH		WFDC3				CCDC68	TAB3	AC091132.4	PPIL6	SLX4	ZSCAN25
HPGDS		LINC00839				ACOT4	PIGU	IL1RAPL1	MYO7B	MYO16	STXBP4
FKBP1B		GPR161				PABPC4L	ZNF44	FAM41C	CNKSR1	CA3-AS1	AL138756.1
MIAT		MDH1B				DNAJC6	GK	AC046143.2	MIATNB	BTBD8	ZKSCAN3
USP27X		N4BP2				ANKRD18A	GRIK2	RXRG	FAM228A	GAS2	ROM1
EME2		ARHGAP19				UVSSA	PTP4A3	AC025449.2	CEACAM8	TLL1	CIDEC
NBPF9		TBX15				POF1B	SLC25A15	LINC01023	AL049597.2	LMLN	SLC45A1
IL10RB-DT		LHX2				IGF2	AC008608.2	AC105271.1	AC011978.2	RRM2	CNTN2
GNLY		LINC00891				WNT9B	NAA25	DNAAF3	HOXA5	AL138724.1	PPM1H
MFSD9		TYMSOS				LINC02137	WEE1	AC026304.1	CNTNAP3	RALGPS2	TBCCD1
AC127035.1		AC116348.1				C1orf159	CWC15	AC051619.5	ATP5MGL	GOLGA6L9	AC116667.1
SLC24A4		DNMT3B				GRAMD1C	HMGN3-AS1	GRIP1	AC090337.1	UCMA	ILDR2
SLX4IP		AC138969.1				WARS2-AS1	SAR1B	AC016405.3	AL139383.1	LINC01409	NAPA-AS1
DOC2A		AMPH				MAD2L1	PER2	FATE1	UCP3	HIST1H4H	NCAPD3
FAM234B		EIF1AY				VXN	ANKRD12	AL008582.1	AC006249.1	ZMYND12	INTS6-AS1
ATP6V1G2		GDF10				SHISA8	ZNF608	PPP2R2C	PRKAR2A-AS1	RELA-DT	ZIK1
BORCS5		AC019069.1				SPTBN5	SAFB	NTRK3	DGUOK-AS1	RFESD	GNRH1
BEND6		AZIN2				PLEKHH1	TMEM186	ZSCAN1	ZNF233	SETD9	FZD3
MIR762HG		SOCS2-AS1				KCNT1	AC237221.1	SAPCD1-AS1	ZNF365	MMP25-AS1	SYTL5
ARSJ		AC009113.1				SRARP	DENND4A	GPR27	EPHX4	CASC15	LRRC6
FAM110A		SELE				ZNF883	ICA1	PANX2	AC007952.4	KIF27	ZDHHC11B
RHBDL1		AC093726.2				ARIH2OS	SOCS3	SCX	SLC23A3	ZNF681	CCDC154
LINC00891		AC105219.1				COL19A1	MICAL3	ZDHHC11B	AC053545.1	AL161421.1	CD96
C1orf112		ESCO2				BARD1	DDHD2	KLHL32	ANKRD18A	MAP10	ANXA2R
AC027307.2		ABCG2				ZNF536	TENT5B	NBPF20	SEL1L2	DIRC3	TF
ADAMTS9-AS2		AL049795.1				SLC1A2	BMP2	TMPPE	ACTR3C	SLC45A1	AC079834.2
OSR2		CAMK4				ZBTB7C	IER5	EFL1	LY9	SLC44A3	POC1B-AS1
SIDT1		PROM2				MYRIP	MFNG	LINC02500	KCNJ3	LINC00886	C2orf92
PRAM1		GNRH1				SSTR1	CDADC1	CASQ1	ELL3	CACNA1A	NPB
LINC00649		ZNF345				AL133243.2	AC004918.1	LINC02608	ABCB5	MYOZ1	RYR3
RUBCNL		CYP21A2				AC092171.4	MKLN1-AS	PRR34	AC008079.1	ARHGAP32	PARD6A
DAPP1		ZNF836				ARG2	TANC1	AL513487.1	AC002070.1	GIPR	AF111167.2
MYLPF		RBP5				AC073389.2	ECHDC2	AL390242.1	AL136295.6	Z95331.1	IGSF5
MATN3		AC069544.1				MAGI2	SPHKAP	AC108471.2	SLC12A5	FAM155A	ERP27
HPSE		TRMT44				AL133351.1	AHDC1	TDRD9	COL11A2	YJEFN3	RAP1GAP
FZD5		ZNF343				UBE2Q2L	ZNF529-AS1	MYEF2	FAM220A	ZNF850	ACTR3B
SYNGAP1		NEIL3				FAM161A	RAB37	ECT2L	ANKRD10-IT1	ZNF836	TMEM229B
HSD17B14		TMSB15B.1				B4GALT1-AS1	AL359715.3	AC083809.1	SYCP2L	MYBPHL	DKK2
VCAM1		TMEM198				ACSBG1	SEMA3A	AC145285.6	AC105285.1	P2RY2	MIS18A
CST6		KIAA1586				KLHL34	PCNT	KLHDC9	ELAVL3	MAP6D1	ZNF367
PAPLN		SLC2A9				QRICH2	PRXL2A	ZSCAN5A	GPRC5A	RAD52	NTF3
AC040977.1		LINC01191				AC091544.2	RASA1	REXO5	AC015726.1	AL158071.3	AC008875.3
NEB		ETV7				DLG2	SKP2	SRFBP1	TMED2-DT	AC092490.1	AL356417.2
SPIN3		AC098487.1				MTCL1	C19orf33	AC006064.5	AC007920.2	MYL5	NDUFV2-AS1
ARL6		IQCA1				TMEM40	AC002467.1	DPH6-DT	CCDC17	TCAF2	CD247
DOCK10		APCDD1L				TOM1L1	PLCXD1	DNAJC28	AL033527.4	PGBD1	CCNB1
ANGPTL7		SLFN12				ST6GALNAC1	SUN1	SLC22A3	EREG	C21orf58	SAA1
AC147067.2		NPIPB5				AC144831.1	ELP3	HMGA2	ARSE	B4GALT6	ZNF738
ASPA		AP001372.2				SLC27A5	TRIT1	FBXO27	LNCTAM34A	AC037198.1	SH3RF3-AS1
FCGR1A		TRIM14				AC123768.4	CRYBG3	ITGB6	AL021155.5	USF1	RCOR2
BEAN1		TMCC1-AS1				ACVR2B	KIAA1958	AC092910.3	SPATA9	AL355312.2	PKIB
LINC01943		SLITRK4				ARHGEF28	TGS1	LINC02137		VSTM2L	FOXD3
PDCD1		PRSS35				FCGBP	ITPRIP	SPESP1		ADAMTSL4-AS1	NUDCD1
AL592183.1		C1RL-AS1				AC073508.3	ALKBH1	NACA2		SCNN1D	MBLAC1
APLF		SIMC1				SLC6A9	AC099508.1	TCP10L		POLR3G	SERAC1
AC107294.2		GOLGA6L4				DACT2	GVQW3	TREM1		LINC00342	AP003307.1
AL359555.4		SUGCT				CES4A	CLN8	GPR62		HK3	NKD2
ZNF468		NR4A2				CHRNE	PAFAH2	AC012368.1		CD1D	EFCAB11
ENTPD7		ZNF883				UHRF1	ACTR1B	TOB1-AS1		GJA3	SRFBP1
PARP15		TBC1D8				CDH23	LRBA	AC104463.2		ZNF551	AC073349.1
MILR1		SSPO				ZNF177	HIST1H1C	AC063919.1		SPESP1	AC245884.8
AC019080.6		ZNF341				ABO	APOB	SLC30A2		STAG3	ZNF606
AC011374.2		CHEK2				CYP46A1	DUS2	AP001269.4		ZNF821	MORN1
AGAP2-AS1		LBX2-AS1				HS3ST3B1	ROBO4	AC107068.2		NECAB1	FANCD2
ZBTB49		ADAD2				CLSPN	MIR762HG	LRATD1		C5orf38	INHA
GMIP		NEK8				TMEM63C	LCP2	AC005162.3		KCNA2	MMP9
TMSB15A		FAM131B				GATA5	CRELD1	ZNF174		BEX1	AC009318.1
ZNF416		AC116667.1				ADAMTS17	ZNF829	TSNARE1		SHISAL1	RINL
MUSK		MAT1A				SPC24	AC113133.1	AF196972.1		CBR3-AS1	AC010168.2
AC027097.1		AC097662.1				GDPD1	INSR	AL021807.1		AP000873.2	MGAT3
ZNF625		ZNF718				SLC25A27	PCDHGB6	USP49		ZNF660	C8orf48
BAIAP3		TNFAIP8L2				C3orf52	MCTP1	CDA		LINC01341	PRR7
TRIM9		CHD1L				ASPM	DDX56	AC068620.2		TNFSF8	AC078846.1
LINC01929		C9orf139				AC126468.1	CFAP61	HMGN3-AS1		GPD1	ADAM8
AC007743.1		PCOTH				CRIP3	ALG10B	AF117829.1		TTN-AS1	EXOC3L4
CD1D		GAREM2				GET4	TNFRSF11A	OLR1		LINC00476	ZNF709
SGMS1-AS1		AC002456.1				LINC01270	SRSF1	NEBL-AS1		NKD2	TMED2-DT
ADAMTS13		LINC00115				AC096586.1	IGHA1	GAS2		AC020910.5	MKI67
RASGRP4		TSPEAR-AS2				GAL3ST3	TLR5	DAB1		AC005342.1	CCDC9
PPM1N		ATAT1				AC135012.1	PAXIP1-AS2	MIF-AS1		PDE8B	KCNQ4
AC012615.1		LINC01137				CCDC153	MAP2	AC132872.2		AL021707.2	IGSF1
PSD4		AC004943.2				AC091563.1	KLKB1	GDF7		ZNF441	AREG
MPP6		EDRF1-DT				RBMS3-AS3	ZNF275	CDKL3		AC073508.3	SMIM10L2B
AC092821.3		AC005165.1				KBTBD13	AASDHPPT	TPSAB1		LINC00899	CDT1
LINC00174		ACSM3				RSPH9	ZFAND2A	LINC02268		LINC01011	ZNF786
EAF2		ZNF597				VIP	AP000866.1	OGDHL		CNKSR1	HOTAIRM1
KLF8		ZNF786				AC105219.1	SLC7A5	QRFPR		TPSAB1	MAP6D1
LRRC29		AL353748.3				LGI3	RNF169	SCHIP1		ZNF77	UQCRHL
LY6G5C		LHX9				ANKRD34A	DEAF1	ZNF772		KCNJ3	AC105219.1
SH3D21		C10orf143				TIGD2	FBXO48	LINC01186		SMIM5	AC245452.1
PRIMA1		PABPC1L				C19orf18	C17orf75	MIR3936HG		ZNF280C	APBA2
CENPU		RGS22				ANKRD36	ZNF230	DGCR11		PLB1	TPX2
SMOX		CACNA1A				CEP128	ZSCAN9	AC090360.1		GPR85	CYP4B1
TTC39C		AC138207.4				TENM3	ELOVL2	AL390955.2		LCMT1-AS1	AC023157.3
AC007952.4		SLC25A22				AC092164.1	IFFO2	GOLGA8N		CADM4	HPN
NPIPA2		ICOSLG				AC012291.3	TRIM23	RAD51		ABCB4	KIAA1586
DLG5-AS1		PRKCQ-AS1				FAM111A-DT	SPTY2D1OS	TNNI1		AC022382.1	AC040169.1
P2RY13		XYLT1				MAFG-DT	TIMM17A	FICD		MEG9
VILL		AC017076.1				KIAA1958	LRG1	RGS6		MAMSTR
INKA1		SOX5				MTMR11	SOX9-AS1	AL035670.1		SERPINA5
AP001160.2		UBXN10-AS1				AL356488.2	ZNF354A	ETV2		CFAP44
SHROOM2		HIC2				ZNF563	FNDC1	ANKRD34A		FBXO48
GRHL1		POC1B-AS1				RCOR2	AHCTF1	AC009054.2		ADM2
SLC66A1L		RGMB-AS1				LCN12	MKLN1	NUDT4B		TRPC6
NRXN3		AP005205.2				RCL1	NOL3	AC009318.3		AC083855.2
TRO		MAGEL2				AL355353.1	CCDC59	FAM209B		PRMT9
BLNK		SPATA9				MROH7	MYOT	AL161772.1		OSBPL7
LIFR-AS1		DIAPH3				LINC00482	SOX15	ARHGEF7-AS2		AL645608.7
IQCN		AL161457.2				RNF212	COA6	MAMDC2		AC105285.1
ZNF70		ZNF487				S100B	HUWE1	HIST1H1E		MEF2C-AS1
P2RX7		PABPC4L				RAP2C-AS1	KIF22	GP6		RORC
PI4K2B		SPN				LRIG2-DT	DNAJC6	POMZP3		ZFAND4
FAM47E		CHL1				ZNF737	MAGI1	C15orf56		DENND2C
STAT4		NLRC3				FGF14	CDC42EP3	AC091057.3		AC025048.2
TOE1		SPNS3				PCDHGA1	RASAL2	CXCR1		SSUH2
STAP2		FCER2				AL137026.1	BLZF1	GRIN3A		MOCOS
AC145207.5		CCDC24				AL627309.5	RTN2	MAL		BEND5
AGPAT4		ZFP41				AC073349.1	AREG	AL512662.2		AC092807.2
AL590617.2		AL353600.1				AL035530.2	AL033384.1	SMC2-AS1		AC008969.1
NLRP3		CD27				TMEM52	SMARCD1	ZNF14		EFHC2
MEG9		GPR150				CDKN2B	KDM4B	AC026471.1		FBXL14
AC110285.2		LRRN2				SCN4A	AC005618.1	AC011346.1		KLHL33
ZFHX2-AS1		FBXO41				CHAC2	WNK2	AL133367.1		ZNF568
ARHGAP11A		NPAS1				IL17RB	MTLN	AC009506.1		LINC01176
BISPR		AL021368.2				FAM71D	PDSS1	SHLD3		S100A12
SERHL2		SLC24A4				LINC01011	ZNF383	WNT5A		DLGAP1-AS2
AL138724.1		AC005332.4				GLIPR1L2	PLIN4	LINC00630		BLM
FAM229A		NCAPH				AC010889.1	PCBD1	RAD51AP1		ZNF554
LRRC6		AC004918.1				TTC30B	ITGA6	AC067930.8		VAT1L
RASSF7		TMEM178A				AC046143.1	NGLY1	MESP1		IGSF22
TMEM108		AL022322.1				ACTR3C	KIN	CCL7		DMGDH
APOBEC3D		CARMIL2				SCHIP1	CIB2	AC022613.2		BX664727.3
LRRC27		AC093525.6				SPAG4	PELI1	IQCC		ASGR2
AHSP		AL009178.2				TET1	NRM	AC010894.2		AC137932.2
AP001267.3		AC135507.1				CRHBP	ADAT2	ASIC3		AF111167.2
LINC00342		CXCL1				SLC9A5	C10orf71	C12orf60		RAD54B
OSBPL7		FBF1				AC103691.1	HOOK2	TSGA10		ZNF563
TMCO6		SND1-IT1				LRRC61	ARMCX5	AC108021.1		TNNI1
TUBB4A		NR5A2				NEK11	SLC27A5	ASMTL-AS1		JMJD7
AP000254.2		TRG-AS1				PHF7	MYO1B	AKR1B10		CCDC153
SSTR2		MAP4K1				MACROD2	SCAF1	HIST1H2BN		P3H2
AC108075.1		TMEM229B				FZD4-DT	SLC26A9	TSPOAP1-AS1		SHISA3
ZNF792		CST2				AC090825.1	BCAS2	AC027449.1		MPV17L
CYP19A1		ZNF426-DT				AL021707.2	CDR2	NXPH4		PRH1
AC010680.1		AC004130.2				CACNB4	UBN1	KCNT1		ZSWIM9
ITGA9-AS1		AL356481.1				AGAP9	CCDC122	LINC02517		ZNF81
SIGLEC9		TAF5				GRM1	CDK7	AL159169.2		LINC00921
DCLRE1B		TNRC6C-AS1				ZNF154	GPN1	LPAR5		VSIG2
SH2D2A		PCNX2				AC011603.2	ZNF33A	AC007614.1		PIGW
PPP3CB-AS1		CCDC74B				TRIM72	AC051618.1	SLC6A17		ZNF250
MAP2K6		NEK5				FAM71F2	ALDOC	HIST1H3E		TCEAL2
H1FX-AS1		COL11A1				GLP1R	GMEB1	CYP4F3		PPP1R3D
AC068473.5		AC008555.1				EIF3C	AQP3	AC096667.1		LMAN1L
MXD3		TTC30B				RNASEH1-AS1	TIMM44	PHACTR3		ZBED3-AS1
MANEAL		LMX1B				ADCYAP1R1	DYRK3	AP000223.1		ENTPD2
SARDH		SNHG22				LINC02104	EFNA1	AC124068.2		TRMT10B
PSTPIP1		AC083843.3				HNRNPA1L2	LY75	SHROOM3		HAMP
SPINT1		AC010904.2				C20orf96	FAM221A	SIRPB1		EYA1
OAZ3		AC108134.3				ZNF813	TMEM183A	LINC02739		ZNF578
AL135999.1		AL353593.1				SLC16A12-AS1	RFTN1	LEAP2		FAM227B
COL8A2		INHBA				AL136295.7	AC009779.2	AC123768.4		ZNF57
AL138756.1		ZFP2				AC048341.1	AC064807.1	AC069307.1		LY6G5C
PCNX2		ST20-AS1				AC021087.4	IMMP1L	AL391988.1		ZCCHC4
CYTIP		PROSER3				AC099489.1	BRCA2	AC107884.1		NDUFA6-DT
ZNF85		AC060766.4				ABCG4	NDUFAF5	SERPINB2		RIMKLA
LMTK3		TMED2-DT				RGS18	CLIP4	NDUFV2-AS1		LRCH2
AC147067.1		EMILIN3				AC005523.2	C16orf46	UHRF1		ZNF829
SPINK5		GAS6-AS1				SEMA3E	C11orf91	DEPDC1B		AC005393.1
TPSB2		AIFM3				AC007906.2	KIF21A	TPM1-AS		MYO18A
RYR1		IL20RA				AL360013.3	CDC37L1	AC012306.3		ENTPD3
NHLRC1		C2orf81				GPR3	PRR12	DMP1		FLG-AS1
FAM198B-AS1		TLR7				RNF43	EIF2S2	HIF1A-AS3		CAPN12
PMAIP1		P2RY11				AC093151.3	PKNOX2	NECAB1		ORC6
TMEM86B		FO393401.1				AC068338.3	MTAP	EGF		ZNF571
AL121933.2		MATN3				ZNF589	AC026304.1	PCP4		AC106897.1
LINC00278		CCND2-AS1				CAHM	MTRF1	TP63		SINHCAF
TPX2		ZNF20				AL355916.1	TOP1	CDS1		CCNE1
LPAR2		FUT10				TWNK	UBR1	AC096642.1		AC092384.1
AC004241.1		AL590822.3				GOLGA6L10	FRYL	LRRC8C-DT		MCTP2
LPAR5		RAC3				KCNMB3	FAM214A	RADX		AP000866.1
AC025171.1		CDK15				OCLN	RFX2	AL359258.2		LINC02352
AC008443.1		SLC35G1				TDRP	BAHD1	AL049840.6		GABRB3
APBA1		ANKDD1A				HAS2	B4GALT6	SLC16A6		ESRRB
MYOZ1		LINC01943				CPS1	AC106791.1	ST8SIA2		DNAJC28
AC010883.3		AL391807.1				ENAM	DHFR	AC009318.4		DICER1-AS1
AL035587.2		TMEM200A				AC239868.1	CASKIN1	PLS1		AC133552.5
AC080038.1		SH2D3A				PCDHB6	DACT1	TUBB1		DNAJC6
LSMEM1		POP1				RNF139-AS1	AC016957.2	AC007666.1		HMGCLL1
PROCA1		CRACR2A				TRDMT1	GIMAP5	ZSCAN16		C1orf74
FERMT1		AC107068.1				CD200	SOCS7	CD300LB		PIFO
USP46-AS1		AL158212.2				PCDHGA8	BMP5	NTF3		SYCP2
ZC3H12D		AL391001.1				WDR76	HS3ST3B1	AC099508.1		FKBPL
NRXN2		TRPC4				ZNF669	OSBPL10	TIRAP		CATSPERG
UCN		SDS				PDIA2	AC124045.1	AC025048.2		AURKC
ZNF613		AC008035.1				EFCAB13	PDZRN3	AC008969.1		AC084036.1
PRR5		APOC2				AC040169.1	PPP1R1C	STK33		AC007920.2
MELTF-AS1		LINC01410				LINC00886	PIP4P1	AC002550.2		TBC1D30
LINC01232		CORT				AC099778.1	C4orf54	AC132192.2		OAZ3
NUAK2		LINC02803				PRDM8	ECHDC3	AC069224.1		AP001160.2
LINC00526		TNNC2				LINC02506	LRRC52-AS1	RTN4RL1		LINC01963
FAM182A		PIF1				SLC9C1	SLC16A1-AS1	CASKIN1		AC004812.2
SLITRK6		SNORC				TFPI2	B3GALT6	PUS7		FCGR3B
LINC02185		DNA2				IRX1	MAFK	AL606491.1		PLK1
AC008264.2		AL356776.2				AC079414.3	CCDC85C	MYLK-AS1		USP35
RAB37		AC120053.1				KIF11	STAT3	MYO16		SHROOM2
QPCTL		OLMALINC				AC007406.3	FLVCR1	LERFS		CLSPN
AC027097.2		AL512791.2				TIPARP-AS1	GIMAP4	AL731537.1		TMEFF1
ADAMTSL1		AL845472.1				CASKIN1	TTC27	MYRFL		SULT1A2
SMAD5-AS1		LINC01091				AC010531.6	PDE8B	SLN		GPR137C
AC048382.6		KIF2C				PDZD4	THBD	LCMT1-AS1		PROK1
ADD2		GPR137C				CCDC110	ZNF514	AC103740.1		KLF5
[truncated: 1,001 more rows]

## Sheet: TableS3.DCIS gene signatures
Gene	CellType
MS4A1	B cells
BANK1	B cells
FCRL1	B cells
BLK	B cells
CXCR5	B cells
FCER2	B cells
CD19	B cells
PAX5	B cells
VPREB3	B cells
COL19A1	B cells
TNFRSF13C	B cells
CD22	B cells
FCRLA	B cells
KHDRBS2	B cells
FAM177B	B cells
WNT16	B cells
KLK1	B cells
CLEC17A	B cells
UGT8	B cells
TNFRSF13B	B cells
COL4A3	B cells
CR2	B cells
HTR3A	B cells
AFF3	B cells
BEND4	B cells
LY9	B cells
TLR10	B cells
STAP1	B cells
CNR2	B cells
SIGLEC6	B cells
ABCB4	B cells
C12orf42	B cells
RALGPS2	B cells
ARHGAP24	B cells
SNX22	B cells
CRIP3	B cells
ZNF888	B cells
KCNH2	B cells
FAM129C	B cells
PARP15	B cells
ADAM28	B cells
FCRL2	B cells
FCMR	B cells
P2RX5	B cells
GPR52	B cells
GNG7	B cells
AIM2	B cells
GPR18	B cells
PNMA5	B cells
RIC3	B cells
BACH2	B cells
CD79A	B cells
DOK7	B cells
KCNH8	B cells
BCAS4	B cells
HSF5	B cells
PIKFYVE	B cells
EML6	B cells
BTLA	B cells
SIDT1	B cells
PCDH9	B cells
HVCN1	B cells
ANK1	B cells
FCRL4	B cells
"MARCH1"	B cells
HLA-DOB	B cells
MACROD2	B cells
TMEM156	B cells
GAPT	B cells
SHISA8	B cells
TMEM154	B cells
CLECL1	B cells
FGD2	B cells
BLNK	B cells
KLK2	B cells
NTNG1	B cells
JADE3	B cells
CD79B	B cells
MTSS1	B cells
STAG3	B cells
IL7	B cells
AP1S3	B cells
COCH	B cells
CCR7	B cells
POU2F2	B cells
CD72	B cells
FCRL3	B cells
CDCA7L	B cells
VNN2	B cells
STK33	B cells
RPEL1	B cells
ZBTB12	B cells
KBTBD8	B cells
AK8	B cells
NRL	B cells
PRCD	B cells
DSCAML1	B cells
CD37	B cells
ZNF107	B cells
SP140	B cells
IFT57	B cells
PCDHGA7	B cells
DIRAS1	B cells
CD180	B cells
RHEBL1	B cells
DUS2	B cells
ARHGAP25	B cells
CD83	B cells
MED12L	B cells
LYN	B cells
AMN1	B cells
RNF103-CHMP3	B cells
PIGB	B cells
KDM4B	B cells
PIGR	B cells
HDAC9	B cells
IRF8	B cells
ADORA2A	B cells
CHI3L2	B cells
ZNF879	B cells
QRSL1	B cells
SNX2	B cells
IL16	B cells
RRAS2	B cells
TFEB	B cells
GNB5	B cells
FAM49A	B cells
CEP85	B cells
PGBD4	B cells
FAM117B	B cells
TUBB4A	B cells
ZNF10	B cells
KIAA0319	B cells
TMEM243	B cells
VCPKMT	B cells
BORCS6	B cells
CR1	B cells
CYSLTR1	B cells
DMXL1	B cells
HLA-DQA2	B cells
LTB	B cells
SESN3	B cells
XPO4	B cells
SMIM14	B cells
PCDHGB4	B cells
ZNF852	B cells
TESK2	B cells
SELL	B cells
RCSD1	B cells
INPP5F	B cells
ZNF564	B cells
NRROS	B cells
KPNA5	B cells
ZNF257	B cells
SIPA1L1	B cells
ZSWIM3	B cells
METTL4	B cells
RASGRP2	B cells
MEF2C	B cells
PXK	B cells
ANKRD44	B cells
TTC24	B cells
TMED8	B cells
NCF1	B cells
SP110	B cells
CCDC141	B cells
CNKSR2	B cells
ZNF235	B cells
HLA-DRA	B cells
ORAI2	B cells
CD55	B cells
PRKCB	B cells
RBM11	B cells
ZNF736	B cells
BCL11A	B cells
SMCHD1	B cells
FBXO41	B cells
CMTM6	B cells
DAPP1	B cells
COQ10A	B cells
ARMC12	B cells
BTK	B cells
IFNLR1	B cells
SLC6A16	B cells
FASTKD1	B cells
PPP3CC	B cells
ZNF432	B cells
ZNF395	B cells
FAM24B	B cells
HLA-DPB1	B cells
BEND5	B cells
HELQ	B cells
ZNF804A	B cells
GGA2	B cells
ZNF256	B cells
ZNF318	B cells
SSH2	B cells
TTN	B cells
DEPDC5	B cells
CXCR4	B cells
FLT3	Dendritic cells
TREML2	Dendritic cells
UPK3A	Dendritic cells
FCER1A	Dendritic cells
TIFAB	Dendritic cells
PLD4	Dendritic cells
NPFFR1	Dendritic cells
RUFY4	Dendritic cells
ENHO	Dendritic cells
PPM1J	Dendritic cells
CD1E	Dendritic cells
SERPINF2	Dendritic cells
CD300LB	Dendritic cells
S100B	Dendritic cells
NAPSA	Dendritic cells
CD1C	Dendritic cells
CD1A	Dendritic cells
TVP23A	Dendritic cells
GPAT3	Dendritic cells
FUT7	Dendritic cells
CLEC9A	Dendritic cells
LOR	Dendritic cells
CD207	Dendritic cells
PPY	Dendritic cells
WDFY4	Dendritic cells
CCL17	Dendritic cells
CD1B	Dendritic cells
MYCL	Dendritic cells
DNASE1L3	Dendritic cells
SMOC1	Dendritic cells
CSF2RA	Dendritic cells
CLEC10A	Dendritic cells
SEMA7A	Dendritic cells
ELAVL4	Dendritic cells
SPIB	Dendritic cells
LAMP3	Dendritic cells
CYP2S1	Dendritic cells
IGLON5	Dendritic cells
TTYH2	Dendritic cells
P2RY14	Dendritic cells
WDR49	Dendritic cells
SIGLEC5	Dendritic cells
SEZ6L	Dendritic cells
PROC	Dendritic cells
AMZ1	Dendritic cells
ACPP	Dendritic cells
TIGD3	Dendritic cells
NME8	Dendritic cells
LGALS2	Dendritic cells
EBI3	Dendritic cells
IRF8	Dendritic cells
CBFA2T3	Dendritic cells
ST18	Dendritic cells
IDO1	Dendritic cells
HDAC9	Dendritic cells
EGLN3	Dendritic cells
GNA15	Dendritic cells
CACNA2D3	Dendritic cells
ICOSLG	Dendritic cells
BCL11A	Dendritic cells
GPR31	Dendritic cells
ADORA2B	Dendritic cells
MCOLN2	Dendritic cells
C17orf107	Dendritic cells
ARID3A	Dendritic cells
CCSER1	Dendritic cells
ZFAT	Dendritic cells
CA5A	Dendritic cells
CACNA1F	Dendritic cells
ENO3	Dendritic cells
CHRNE	Dendritic cells
GPR157	Dendritic cells
CEACAM4	Dendritic cells
MOGAT1	Dendritic cells
GCSAM	Dendritic cells
CCDC175	Dendritic cells
JAML	Dendritic cells
OPN3	Dendritic cells
RIMS3	Dendritic cells
PRKAR2B	Dendritic cells
FBXO27	Dendritic cells
DLGAP3	Dendritic cells
CD1D	Dendritic cells
SLCO5A1	Dendritic cells
RUBCN	Dendritic cells
TSPAN33	Dendritic cells
"SEPT3"	Dendritic cells
SMPD3	Dendritic cells
CIITA	Dendritic cells
RNASE6	Dendritic cells
IRF4	Dendritic cells
TSKS	Dendritic cells
FGD2	Dendritic cells
DAPP1	Dendritic cells
CHAF1A	Dendritic cells
THEMIS2	Dendritic cells
MS4A4E	Dendritic cells
RNF144B	Dendritic cells
HLA-DQA2	Dendritic cells
ETV3	Dendritic cells
CHML	Dendritic cells
OXCT2	Dendritic cells
SLC41A2	Dendritic cells
ACRBP	Dendritic cells
C17orf64	Dendritic cells
GAPT	Dendritic cells
RAB7B	Dendritic cells
RASSF2	Dendritic cells
GPER1	Dendritic cells
CCDC62	Dendritic cells
FCHSD2	Dendritic cells
LY75	Dendritic cells
GPR132	Dendritic cells
SLAMF7	Dendritic cells
GPR183	Dendritic cells
TLX2	Dendritic cells
MIF4GD	Dendritic cells
RASGRP4	Dendritic cells
ASGR2	Dendritic cells
TET2	Dendritic cells
EDEM1	Dendritic cells
CPVL	Dendritic cells
CLEC4F	Dendritic cells
RPS6KA4	Dendritic cells
PAK1	Dendritic cells
RIPK2	Dendritic cells
CXorf21	Dendritic cells
CALN1	Dendritic cells
SPATC1	Dendritic cells
PLEK	Dendritic cells
IRAK2	Dendritic cells
ETV6	Dendritic cells
TBX19	Dendritic cells
QPCT	Dendritic cells
SPDYA	Dendritic cells
KCNN1	Dendritic cells
GRASP	Dendritic cells
SLC15A4	Dendritic cells
HOMER2	Dendritic cells
IRF7	Dendritic cells
CLIC2	Dendritic cells
C19orf84	Dendritic cells
MAP3K14	Dendritic cells
MAN2B1	Dendritic cells
STRIP2	Dendritic cells
NRROS	Dendritic cells
LRRK1	Dendritic cells
FAM49A	Dendritic cells
SH2B3	Dendritic cells
UVRAG	Dendritic cells
NBPF10	Dendritic cells
POLB	Dendritic cells
BOLA2	Dendritic cells
CHN2	Dendritic cells
ZBTB18	Dendritic cells
HLA-DPB1	Dendritic cells
MPEG1	Dendritic cells
KLHL6	Dendritic cells
PRMT9	Dendritic cells
NR4A3	Dendritic cells
PTPRE	Dendritic cells
MCM5	Dendritic cells
N4BP2	Dendritic cells
SRD5A1	Dendritic cells
MOB1B	Dendritic cells
RGS18	Dendritic cells
CLEC6A	Dendritic cells
SNX20	Dendritic cells
PSTPIP2	Dendritic cells
PRKCB	Dendritic cells
HLA-DQB1	Dendritic cells
EQTN	Dendritic cells
GNA13	Dendritic cells
HLA-DQA1	Dendritic cells
IGF2BP2	Dendritic cells
SLC12A7	Dendritic cells
CLEC4A	Dendritic cells
MMP25	Dendritic cells
HLA-DQB2	Dendritic cells
PHACTR1	Dendritic cells
AP1S2	Dendritic cells
SHTN1	Dendritic cells
SUSD1	Dendritic cells
HLA-DPA1	Dendritic cells
ZNF385A	Dendritic cells
ASIP	Dendritic cells
ACHE	Dendritic cells
BCL2A1	Dendritic cells
DGAT2	Dendritic cells
C12orf45	Dendritic cells
CBX6	Dendritic cells
BTLA	Dendritic cells
GCA	Dendritic cells
GPR35	Dendritic cells
IGFLR1	Dendritic cells
GRAMD1B	Dendritic cells
SNN	Dendritic cells
SLC9A7	Dendritic cells
JAK2	Dendritic cells
INSIG1	Dendritic cells
EMCN	Endothelial cells
RAMP2	Endothelial cells
ADGRL4	Endothelial cells
PLVAP	Endothelial cells
CALCRL	Endothelial cells
TIE1	Endothelial cells
VWF	Endothelial cells
PALMD	Endothelial cells
CD34	Endothelial cells
MYCT1	Endothelial cells
CLEC14A	Endothelial cells
AQP1	Endothelial cells
MMRN2	Endothelial cells
CDH5	Endothelial cells
ADCY4	Endothelial cells
EGFL7	Endothelial cells
NPR1	Endothelial cells
CD93	Endothelial cells
ERG	Endothelial cells
CYYR1	Endothelial cells
HOXD9	Endothelial cells
CPLX1	Endothelial cells
S1PR1	Endothelial cells
RHOJ	Endothelial cells
SOX7	Endothelial cells
NR5A2	Endothelial cells
ARAP3	Endothelial cells
SEMA6B	Endothelial cells
HSPG2	Endothelial cells
SOX17	Endothelial cells
PECAM1	Endothelial cells
PREX2	Endothelial cells
ESAM	Endothelial cells
RAMP3	Endothelial cells
IPO11	Endothelial cells
TGM2	Endothelial cells
TMEM255B	Endothelial cells
JAM2	Endothelial cells
CLDN15	Endothelial cells
FAM167B	Endothelial cells
CARD10	Endothelial cells
ASB9	Endothelial cells
HYAL2	Endothelial cells
FAM110D	Endothelial cells
ADAMTS9	Endothelial cells
GALNT18	Endothelial cells
GNG11	Endothelial cells
PTPRB	Endothelial cells
HOXD1	Endothelial cells
RAPGEF5	Endothelial cells
GATA2	Endothelial cells
FGD5	Endothelial cells
PKP4	Endothelial cells
DOCK9	Endothelial cells
SEMA6A	Endothelial cells
FLT1	Endothelial cells
RAPGEF3	Endothelial cells
ACVRL1	Endothelial cells
HOXD3	Endothelial cells
SPRY1	Endothelial cells
SCARF1	Endothelial cells
LDB2	Endothelial cells
FZD4	Endothelial cells
VWA1	Endothelial cells
ARHGEF15	Endothelial cells
ENG	Endothelial cells
STC1	Endothelial cells
SLC35G2	Endothelial cells
PTPRM	Endothelial cells
ABLIM2	Endothelial cells
HLX	Endothelial cells
SHROOM4	Endothelial cells
APOLD1	Endothelial cells
MCTP1	Endothelial cells
KANK3	Endothelial cells
CASC10	Endothelial cells
ST6GALNAC3	Endothelial cells
SHE	Endothelial cells
TMEM88	Endothelial cells
MET	Endothelial cells
NOS3	Endothelial cells
BCAM	Endothelial cells
COL15A1	Endothelial cells
DCHS1	Endothelial cells
TSPAN18	Endothelial cells
WWTR1	Endothelial cells
SHANK3	Endothelial cells
LIMS2	Endothelial cells
SH3BGRL2	Endothelial cells
EPB41L4A	Endothelial cells
GRB10	Endothelial cells
SYNPO	Endothelial cells
NOSTRIN	Endothelial cells
RALGAPA2	Endothelial cells
ITGB4	Endothelial cells
SNCG	Endothelial cells
THSD7A	Endothelial cells
CFI	Endothelial cells
ARHGAP29	Endothelial cells
CLEC1A	Endothelial cells
RUNDC3B	Endothelial cells
FAM171A1	Endothelial cells
ITGA6	Endothelial cells
MCF2L	Endothelial cells
ABO	Endothelial cells
MTUS1	Endothelial cells
GPRC5B	Endothelial cells
EPHB4	Endothelial cells
PLEKHG1	Endothelial cells
PKN3	Endothelial cells
CD200	Endothelial cells
TM4SF18	Endothelial cells
TNFRSF10D	Endothelial cells
RBP7	Endothelial cells
LAMA5	Endothelial cells
TEK	Endothelial cells
AVPR2	Endothelial cells
RCAN1	Endothelial cells
TBXA2R	Endothelial cells
PLCB1	Endothelial cells
STARD8	Endothelial cells
HSPA12B	Endothelial cells
ARHGAP23	Endothelial cells
NPDC1	Endothelial cells
TAOK2	Endothelial cells
CDH24	Endothelial cells
RAPGEF4	Endothelial cells
SMAD1	Endothelial cells
GIPC2	Endothelial cells
TDRP	Endothelial cells
CPXM2	Endothelial cells
MMP15	Endothelial cells
LPAR6	Endothelial cells
IL3RA	Endothelial cells
FAM171B	Endothelial cells
FAM219A	Endothelial cells
SLC10A6	Endothelial cells
HOXD8	Endothelial cells
SMAD9	Endothelial cells
ICAM2	Endothelial cells
ROBO4	Endothelial cells
AKAP2	Endothelial cells
TNS2	Endothelial cells
SULT1C4	Endothelial cells
CRYBG3	Endothelial cells
PIK3R3	Endothelial cells
ECE1	Endothelial cells
RASA4	Endothelial cells
FBXO31	Endothelial cells
ARHGAP31	Endothelial cells
SLC9A3R2	Endothelial cells
TEAD4	Endothelial cells
C1orf115	Endothelial cells
OLFM1	Endothelial cells
DLL1	Endothelial cells
RNASE1	Endothelial cells
ITGA5	Endothelial cells
BCR	Endothelial cells
ELK3	Endothelial cells
MAGI1	Endothelial cells
FZD6	Endothelial cells
TMTC1	Endothelial cells
STXBP1	Endothelial cells
ELFN1	Endothelial cells
DOCK6	Endothelial cells
CNKSR3	Endothelial cells
EPHA4	Endothelial cells
FABP4	Endothelial cells
TNFRSF10C	Endothelial cells
RPS6KA2	Endothelial cells
CSGALNACT1	Endothelial cells
FAM124A	Endothelial cells
INSR	Endothelial cells
MFAP3	Endothelial cells
MANSC1	Endothelial cells
HEG1	Endothelial cells
PLPP1	Endothelial cells
INPP1	Endothelial cells
PODXL	Endothelial cells
DOC2B	Endothelial cells
IQCJ-SCHIP1	Endothelial cells
RAVER2	Endothelial cells
TANC1	Endothelial cells
CALML4	Endothelial cells
ETS2	Endothelial cells
KIF17	Endothelial cells
EOGT	Endothelial cells
GPR146	Endothelial cells
SLCO2A1	Endothelial cells
BCL6B	Endothelial cells
HOXD10	Endothelial cells
RPH3AL	Endothelial cells
CASKIN2	Endothelial cells
FKBP1C	Endothelial cells
MAST4	Endothelial cells
TNFAIP1	Endothelial cells
MAPK11	Endothelial cells
BTBD3	Endothelial cells
TMEM246	Endothelial cells
TSPAN12	Endothelial cells
EPCAM	Epithelial cells
KRT8	Epithelial cells
KRT7	Epithelial cells
KRT18	Epithelial cells
MGST1	Epithelial cells
FXYD3	Epithelial cells
AP1M2	Epithelial cells
RAB25	Epithelial cells
PLPP2	Epithelial cells
CD24	Epithelial cells
PKP3	Epithelial cells
CALML5	Epithelial cells
AZGP1	Epithelial cells
REEP6	Epithelial cells
CLDN4	Epithelial cells
SPDEF	Epithelial cells
TM7SF2	Epithelial cells
SLPI	Epithelial cells
F12	Epithelial cells
BSPRY	Epithelial cells
TTC39A	Epithelial cells
TACSTD2	Epithelial cells
GPR160	Epithelial cells
STAP2	Epithelial cells
S100P	Epithelial cells
MAL2	Epithelial cells
CREB3L4	Epithelial cells
SDR16C5	Epithelial cells
PODXL2	Epithelial cells
CBLC	Epithelial cells
C9orf152	Epithelial cells
SMIM22	Epithelial cells
DHCR7	Epithelial cells
AIFM3	Epithelial cells
AK4	Epithelial cells
TPD52L1	Epithelial cells
CRB3	Epithelial cells
TOM1L1	Epithelial cells
NUDT8	Epithelial cells
OVOL1	Epithelial cells
PAK4	Epithelial cells
EFNA3	Epithelial cells
NQO1	Epithelial cells
PRR15L	Epithelial cells
TFAP2A	Epithelial cells
ABHD11	Epithelial cells
HILPDA	Epithelial cells
KCTD1	Epithelial cells
MB	Epithelial cells
TJP3	Epithelial cells
GCAT	Epithelial cells
EPN3	Epithelial cells
DHCR24	Epithelial cells
CLDN7	Epithelial cells
GRTP1	Epithelial cells
C3orf14	Epithelial cells
PEX11A	Epithelial cells
ESRP2	Epithelial cells
SERHL2	Epithelial cells
GRHL2	Epithelial cells
PYCR1	Epithelial cells
MAP7	Epithelial cells
CYP4X1	Epithelial cells
KLC3	Epithelial cells
CHMP4C	Epithelial cells
PAQR4	Epithelial cells
TFAP2B	Epithelial cells
MUCL1	Epithelial cells
GGCT	Epithelial cells
KIAA1324	Epithelial cells
MSX2	Epithelial cells
PKIB	Epithelial cells
ESRP1	Epithelial cells
PFN2	Epithelial cells
MSMO1	Epithelial cells
PAFAH1B3	Epithelial cells
PACSIN3	Epithelial cells
PERP	Epithelial cells
SPINT2	Epithelial cells
ELF3	Epithelial cells
SPDYC	Epithelial cells
FASN	Epithelial cells
CBR3	Epithelial cells
TMEM241	Epithelial cells
PTPN20	Epithelial cells
RHOV	Epithelial cells
SLC25A10	Epithelial cells
FOLR1	Epithelial cells
PXMP4	Epithelial cells
GLYATL2	Epithelial cells
ZNF695	Epithelial cells
TMPRSS13	Epithelial cells
CDH1	Epithelial cells
FOXA1	Epithelial cells
C6orf132	Epithelial cells
LGALS12	Epithelial cells
PSAT1	Epithelial cells
GJB1	Epithelial cells
EFNA4	Epithelial cells
DSP	Epithelial cells
ECE2	Epithelial cells
SDC4	Epithelial cells
LYPD3	Epithelial cells
PHGDH	Epithelial cells
ERBB2	Epithelial cells
RASEF	Epithelial cells
C19orf73	Epithelial cells
TCEA3	Epithelial cells
RAB3D	Epithelial cells
TMEM97	Epithelial cells
SELENBP1	Epithelial cells
MTFR1	Epithelial cells
MTA1	Epithelial cells
EPB41L4B	Epithelial cells
TMEM254	Epithelial cells
CLPSL2	Epithelial cells
TMEM177	Epithelial cells
UQCC3	Epithelial cells
BDH1	Epithelial cells
GGT6	Epithelial cells
PRR36	Epithelial cells
LURAP1L	Epithelial cells
ALDH3B2	Epithelial cells
CNFN	Epithelial cells
CPTP	Epithelial cells
CERS4	Epithelial cells
MEST	Epithelial cells
LIN7B	Epithelial cells
RTKN	Epithelial cells
CXCL17	Epithelial cells
ECHDC3	Epithelial cells
SPINT1	Epithelial cells
CTNNBIP1	Epithelial cells
FADS2	Epithelial cells
COMTD1	Epithelial cells
SERTAD4	Epithelial cells
PON3	Epithelial cells
XYLB	Epithelial cells
NUPR2	Epithelial cells
PPFIA3	Epithelial cells
CDS1	Epithelial cells
""MARCH1"	Epithelial cells
ZBTB7B	Epithelial cells
MCAT	Epithelial cells
CYP2J2	Epithelial cells
SLC5A6	Epithelial cells
SQLE	Epithelial cells
MESP1	Epithelial cells
BNIP3	Epithelial cells
PIP	Epithelial cells
RNF39	Epithelial cells
MYCBP	Epithelial cells
SLC29A2	Epithelial cells
PTPRF	Epithelial cells
CRACR2B	Epithelial cells
WDR34	Epithelial cells
FAM71E1	Epithelial cells
TPD52	Epithelial cells
POLR3H	Epithelial cells
SYT12	Epithelial cells
PSPH	Epithelial cells
SH3YL1	Epithelial cells
RAB38	Epithelial cells
KIAA0895	Epithelial cells
TMEM40	Epithelial cells
CEP70	Epithelial cells
MCCC1	Epithelial cells
IL17RC	Epithelial cells
C9orf116	Epithelial cells
GALE	Epithelial cells
DKK1	Epithelial cells
SAC3D1	Epithelial cells
LDHD	Epithelial cells
SERINC2	Epithelial cells
LRTOMT	Epithelial cells
MYB	Epithelial cells
SCD	Epithelial cells
TLCD1	Epithelial cells
CYP4B1	Epithelial cells
APOO	Epithelial cells
RHOD	Epithelial cells
PNPLA4	Epithelial cells
MORN2	Epithelial cells
KIAA1522	Epithelial cells
CLGN	Epithelial cells
HMGB3	Epithelial cells
BCL2L10	Epithelial cells
SPR	Epithelial cells
LY6K	Epithelial cells
TRIB3	Epithelial cells
C11orf71	Epithelial cells
HRASLS	Epithelial cells
HMGA1	Epithelial cells
IL20RA	Epithelial cells
CD163L1	Epithelial cells
QPRT	Epithelial cells
PEX7	Epithelial cells
RAB27B	Epithelial cells
DIO1	Epithelial cells
MTHFD2L	Epithelial cells
SFRP2	Fibroblasts
DCN	Fibroblasts
LUM	Fibroblasts
CTSK	Fibroblasts
HTRA3	Fibroblasts
TMEM119	Fibroblasts
FBLN1	Fibroblasts
FIBIN	Fibroblasts
RARRES2	Fibroblasts
PODN	Fibroblasts
FMOD	Fibroblasts
THBS2	Fibroblasts
MME	Fibroblasts
LOXL1	Fibroblasts
NEGR1	Fibroblasts
PDGFRL	Fibroblasts
FMO1	Fibroblasts
ISLR	Fibroblasts
ROR2	Fibroblasts
CTHRC1	Fibroblasts
SPOCK1	Fibroblasts
SFRP4	Fibroblasts
CCDC80	Fibroblasts
BICC1	Fibroblasts
P3H3	Fibroblasts
FAP	Fibroblasts
LOX	Fibroblasts
PDPN	Fibroblasts
SGCD	Fibroblasts
PDGFRA	Fibroblasts
AEBP1	Fibroblasts
EFEMP2	Fibroblasts
MXRA8	Fibroblasts
LTBP2	Fibroblasts
CDH11	Fibroblasts
MFAP2	Fibroblasts
LPAR1	Fibroblasts
C1S	Fibroblasts
FGF7	Fibroblasts
MFAP5	Fibroblasts
GLT8D2	Fibroblasts
ZFHX4	Fibroblasts
SPON1	Fibroblasts
UCHL1	Fibroblasts
TENM4	Fibroblasts
SRPX2	Fibroblasts
MXRA5	Fibroblasts
C1QTNF4	Fibroblasts
TENM3	Fibroblasts
GAS1	Fibroblasts
DPT	Fibroblasts
FRMD6	Fibroblasts
NOX4	Fibroblasts
GREM1	Fibroblasts
COL6A3	Fibroblasts
ITGBL1	Fibroblasts
ADAMTS2	Fibroblasts
COL16A1	Fibroblasts
CLMP	Fibroblasts
P4HA3	Fibroblasts
CLSTN2	Fibroblasts
LRRC15	Fibroblasts
LAMA1	Fibroblasts
VGLL3	Fibroblasts
FAM180A	Fibroblasts
CERCAM	Fibroblasts
STEAP1	Fibroblasts
RCN3	Fibroblasts
COL8A1	Fibroblasts
CILP	Fibroblasts
DNM1	Fibroblasts
SCG5	Fibroblasts
IGFBP6	Fibroblasts
ANTXR1	Fibroblasts
WNT2	Fibroblasts
GPX8	Fibroblasts
COL12A1	Fibroblasts
TPST1	Fibroblasts
FBLN2	Fibroblasts
MMP2	Fibroblasts
HEPH	Fibroblasts
ADAM12	Fibroblasts
SSPN	Fibroblasts
EPDR1	Fibroblasts
POSTN	Fibroblasts
SULF1	Fibroblasts
NAP1L3	Fibroblasts
CCDC8	Fibroblasts
FGF10	Fibroblasts
GPC6	Fibroblasts
EMILIN1	Fibroblasts
SSC5D	Fibroblasts
SERPINE2	Fibroblasts
C1R	Fibroblasts
GLIS1	Fibroblasts
NBL1	Fibroblasts
CYP1B1	Fibroblasts
DIO2	Fibroblasts
CHL1	Fibroblasts
PRTFDC1	Fibroblasts
STMN2	Fibroblasts
PRICKLE1	Fibroblasts
WT1	Fibroblasts
PTGFRN	Fibroblasts
GLIS2	Fibroblasts
NKD2	Fibroblasts
INHBA	Fibroblasts
ASPN	Fibroblasts
PODNL1	Fibroblasts
COL1A1	Fibroblasts
COL5A1	Fibroblasts
ZNF385B	Fibroblasts
COMP	Fibroblasts
COL8A2	Fibroblasts
MMP11	Fibroblasts
CNTN4	Fibroblasts
PRDM6	Fibroblasts
ITGB5	Fibroblasts
COL3A1	Fibroblasts
ECM1	Fibroblasts
NCAM2	Fibroblasts
TBX5	Fibroblasts
ANGPTL2	Fibroblasts
FHL2	Fibroblasts
FHOD3	Fibroblasts
BNC2	Fibroblasts
COL1A2	Fibroblasts
SDK1	Fibroblasts
HS3ST3A1	Fibroblasts
VCAN	Fibroblasts
ITGA11	Fibroblasts
COL5A2	Fibroblasts
FOXP2	Fibroblasts
ALDH1B1	Fibroblasts
PRELP	Fibroblasts
GFPT2	Fibroblasts
PCDH7	Fibroblasts
DZIP1	Fibroblasts
BOC	Fibroblasts
FST	Fibroblasts
GJB2	Fibroblasts
CMYA5	Fibroblasts
VSNL1	Fibroblasts
KLK4	Fibroblasts
GLI3	Fibroblasts
NRK	Fibroblasts
SYNDIG1	Fibroblasts
FAM229B	Fibroblasts
ETV1	Fibroblasts
PTHLH	Fibroblasts
C3	Fibroblasts
SCARF2	Fibroblasts
GRIA3	Fibroblasts
SMO	Fibroblasts
RGS17	Fibroblasts
COPZ2	Fibroblasts
AZIN2	Fibroblasts
CYBRD1	Fibroblasts
PDZRN3	Fibroblasts
HMCN1	Fibroblasts
FZD1	Fibroblasts
PNMA2	Fibroblasts
KDELC1	Fibroblasts
DPYSL3	Fibroblasts
RGS22	Fibroblasts
COL6A1	Fibroblasts
OMD	Fibroblasts
SRRM3	Fibroblasts
FSTL1	Fibroblasts
ARSI	Fibroblasts
TPBG	Fibroblasts
HHIPL1	Fibroblasts
FNDC1	Fibroblasts
P4HA2	Fibroblasts
NTM	Fibroblasts
CEMIP	Fibroblasts
PLPP4	Fibroblasts
TM6SF2	Fibroblasts
LRP1	Fibroblasts
ACKR4	Fibroblasts
PRRX2	Fibroblasts
PRRX1	Fibroblasts
PTN	Fibroblasts
CLIP3	Fibroblasts
FKBP10	Fibroblasts
OLFML3	Fibroblasts
P3H4	Fibroblasts
SH3D19	Fibroblasts
CSMD2	Fibroblasts
PLAT	Fibroblasts
BEND6	Fibroblasts
KIAA1549L	Fibroblasts
COL11A1	Fibroblasts
ZNF469	Fibroblasts
CXCL12	Fibroblasts
SMCO2	Fibroblasts
MMP3	Fibroblasts
NPR2	Fibroblasts
COL10A1	Fibroblasts
PLA2R1	Fibroblasts
C5AR1	Monocytes and Macrophages
NCF2	Monocytes and Macrophages
LILRB3	Monocytes and Macrophages
NFAM1	Monocytes and Macrophages
TLR8	Monocytes and Macrophages
LRRC25	Monocytes and Macrophages
PILRA	Monocytes and Macrophages
LILRB2	Monocytes and Macrophages
MS4A7	Monocytes and Macrophages
SLC7A7	Monocytes and Macrophages
OSCAR	Monocytes and Macrophages
SIGLEC9	Monocytes and Macrophages
AIF1	Monocytes and Macrophages
CD14	Monocytes and Macrophages
STAC3	Monocytes and Macrophages
CD300LF	Monocytes and Macrophages
IGSF6	Monocytes and Macrophages
NLRC4	Monocytes and Macrophages
HCK	Monocytes and Macrophages
CD33	Monocytes and Macrophages
SPI1	Monocytes and Macrophages
LILRA6	Monocytes and Macrophages
OLR1	Monocytes and Macrophages
TLR2	Monocytes and Macrophages
CYBB	Monocytes and Macrophages
MNDA	Monocytes and Macrophages
PTPRO	Monocytes and Macrophages
LYZ	Monocytes and Macrophages
CLEC7A	Monocytes and Macrophages
FLVCR2	Monocytes and Macrophages
CD68	Monocytes and Macrophages
SIRPB2	Monocytes and Macrophages
FCGR1A	Monocytes and Macrophages
RENBP	Monocytes and Macrophages
CSF1R	Monocytes and Macrophages
CCR1	Monocytes and Macrophages
MS4A6A	Monocytes and Macrophages
IFI30	Monocytes and Macrophages
FCGR2A	Monocytes and Macrophages
SERPINA1	Monocytes and Macrophages
SLC43A2	Monocytes and Macrophages
ALOX5	Monocytes and Macrophages
CXCL8	Monocytes and Macrophages
MPP1	Monocytes and Macrophages
FCGR1B	Monocytes and Macrophages
ALDH3B1	Monocytes and Macrophages
DMXL2	Monocytes and Macrophages
PTAFR	Monocytes and Macrophages
ITGAX	Monocytes and Macrophages
CD163	Monocytes and Macrophages
TBXAS1	Monocytes and Macrophages
HCAR3	Monocytes and Macrophages
ADGRE2	Monocytes and Macrophages
SLC6A12	Monocytes and Macrophages
CXCL3	Monocytes and Macrophages
TFEC	Monocytes and Macrophages
C3AR1	Monocytes and Macrophages
SLC15A3	Monocytes and Macrophages
CLEC4A	Monocytes and Macrophages
LAIR1	Monocytes and Macrophages
CASP5	Monocytes and Macrophages
GPR84	Monocytes and Macrophages
TREM1	Monocytes and Macrophages
OSM	Monocytes and Macrophages
TNFAIP8L2	Monocytes and Macrophages
ANPEP	Monocytes and Macrophages
LST1	Monocytes and Macrophages
CLEC4E	Monocytes and Macrophages
C1QA	Monocytes and Macrophages
LILRB4	Monocytes and Macrophages
IL18	Monocytes and Macrophages
RASSF4	Monocytes and Macrophages
HCAR2	Monocytes and Macrophages
NPL	Monocytes and Macrophages
RAB20	Monocytes and Macrophages
C1QB	Monocytes and Macrophages
VSIG4	Monocytes and Macrophages
FGL2	Monocytes and Macrophages
CD86	Monocytes and Macrophages
CCRL2	Monocytes and Macrophages
EMILIN2	Monocytes and Macrophages
HK3	Monocytes and Macrophages
ITGAM	Monocytes and Macrophages
TM6SF1	Monocytes and Macrophages
KCNE1	Monocytes and Macrophages
PLBD1	Monocytes and Macrophages
HMOX1	Monocytes and Macrophages
C1QC	Monocytes and Macrophages
P2RX7	Monocytes and Macrophages
ADAMTSL4	Monocytes and Macrophages
MS4A4A	Monocytes and Macrophages
CLEC5A	Monocytes and Macrophages
SIGLEC10	Monocytes and Macrophages
SLC2A9	Monocytes and Macrophages
RTN1	Monocytes and Macrophages
CXCL16	Monocytes and Macrophages
LILRB1	Monocytes and Macrophages
MILR1	Monocytes and Macrophages
SLC31A2	Monocytes and Macrophages
SLC11A1	Monocytes and Macrophages
FPR3	Monocytes and Macrophages
SIRPA	Monocytes and Macrophages
CPVL	Monocytes and Macrophages
CARD9	Monocytes and Macrophages
PTGS1	Monocytes and Macrophages
APOC1	Monocytes and Macrophages
ARL11	Monocytes and Macrophages
SCIMP	Monocytes and Macrophages
SLAMF8	Monocytes and Macrophages
SNX10	Monocytes and Macrophages
SLC1A3	Monocytes and Macrophages
BST1	Monocytes and Macrophages
KCNMA1	Monocytes and Macrophages
TLR1	Monocytes and Macrophages
FBP1	Monocytes and Macrophages
SDS	Monocytes and Macrophages
TMEM150B	Monocytes and Macrophages
LY86	Monocytes and Macrophages
DAPK1	Monocytes and Macrophages
G0S2	Monocytes and Macrophages
C15orf48	Monocytes and Macrophages
TNFSF13B	Monocytes and Macrophages
CTSS	Monocytes and Macrophages
NAIP	Monocytes and Macrophages
TREM2	Monocytes and Macrophages
EPHB2	Monocytes and Macrophages
PIK3AP1	Monocytes and Macrophages
CLEC12A	Monocytes and Macrophages
VMO1	Monocytes and Macrophages
SLC37A2	Monocytes and Macrophages
MSR1	Monocytes and Macrophages
ACP5	Monocytes and Macrophages
HLA-DMB	Monocytes and Macrophages
MERTK	Monocytes and Macrophages
RNF130	Monocytes and Macrophages
ABCC3	Monocytes and Macrophages
LOXL3	Monocytes and Macrophages
SIGLEC1	Monocytes and Macrophages
IRF5	Monocytes and Macrophages
DOK3	Monocytes and Macrophages
IL1RN	Monocytes and Macrophages
DLEU7	Monocytes and Macrophages
SPP1	Monocytes and Macrophages
CACNA2D4	Monocytes and Macrophages
FCER1G	Monocytes and Macrophages
PLAUR	Monocytes and Macrophages
TLR4	Monocytes and Macrophages
GM2A	Monocytes and Macrophages
RNASE6	Monocytes and Macrophages
SOWAHD	Monocytes and Macrophages
MFSD1	Monocytes and Macrophages
NAGA	Monocytes and Macrophages
AMPD3	Monocytes and Macrophages
ARHGAP22	Monocytes and Macrophages
APOE	Monocytes and Macrophages
CD4	Monocytes and Macrophages
PLA2G7	Monocytes and Macrophages
CPA6	Monocytes and Macrophages
TNNI2	Monocytes and Macrophages
SLC12A5	Monocytes and Macrophages
FABP3	Monocytes and Macrophages
FPR1	Monocytes and Macrophages
ZMYND15	Monocytes and Macrophages
CXCL2	Monocytes and Macrophages
C11orf45	Monocytes and Macrophages
FMNL2	Monocytes and Macrophages
SLC8A1	Monocytes and Macrophages
ZNF804A	Monocytes and Macrophages
CSF3R	Monocytes and Macrophages
HPSE	Monocytes and Macrophages
MMP19	Monocytes and Macrophages
ADAP2	Monocytes and Macrophages
LIPA	Monocytes and Macrophages
TNFAIP2	Monocytes and Macrophages
MAFB	Monocytes and Macrophages
VNN1	Monocytes and Macrophages
CEBPA	Monocytes and Macrophages
HLA-DOA	Monocytes and Macrophages
SLC16A10	Monocytes and Macrophages
C5AR2	Monocytes and Macrophages
DPEP2	Monocytes and Macrophages
TNFSF15	Monocytes and Macrophages
BTK	Monocytes and Macrophages
ACOT11	Monocytes and Macrophages
PHACTR1	Monocytes and Macrophages
SDC3	Monocytes and Macrophages
C1orf162	Monocytes and Macrophages
PDCD1LG2	Monocytes and Macrophages
OTOA	Monocytes and Macrophages
OPRL1	Monocytes and Macrophages
TYROBP	Monocytes and Macrophages
ATP6V1B2	Monocytes and Macrophages
LHFPL2	Monocytes and Macrophages
CYP27A1	Monocytes and Macrophages
ZGLP1	Monocytes and Macrophages
PLTP	Monocytes and Macrophages
CD84	Monocytes and Macrophages
CD300C	Monocytes and Macrophages
HTRA4	Monocytes and Macrophages
ABCA1	Monocytes and Macrophages
TXK	NK cells
GNLY	NK cells
KLRD1	NK cells
TMIGD2	NK cells
SH2D1B	NK cells
IL18RAP	NK cells
CTSW	NK cells
MATK	NK cells
SLCO4C1	NK cells
NCR1	NK cells
MLC1	NK cells
PRF1	NK cells
CD244	NK cells
NKG7	NK cells
ZMAT4	NK cells
KIR3DL2	NK cells
TBX21	NK cells
KLRF1	NK cells
NCR3	NK cells
XCL2	NK cells
KLRC1	NK cells
GZMB	NK cells
PTGDR	NK cells
NCAM1	NK cells
TSPAN32	NK cells
KLRB1	NK cells
MCTP2	NK cells
RAB37	NK cells
IL2RB	NK cells
HOPX	NK cells
FCRL6	NK cells
PLAC8	NK cells
SAMD3	NK cells
TTC38	NK cells
CEP78	NK cells
CD160	NK cells
COLQ	NK cells
CD247	NK cells
GZMM	NK cells
ZBTB16	NK cells
MYBL1	NK cells
C11orf21	NK cells
CST7	NK cells
FAM169A	NK cells
TMEM71	NK cells
SYTL3	NK cells
YPEL1	NK cells
JAKMIP2	NK cells
PYHIN1	NK cells
SLFN13	NK cells
IFNL1	NK cells
KLRC2	NK cells
PRSS57	NK cells
PTPN4	NK cells
CMC1	NK cells
SPN	NK cells
CD300A	NK cells
PTGER2	NK cells
UTS2	NK cells
CLIC3	NK cells
GZMA	NK cells
CD226	NK cells
B3GNT7	NK cells
BIN2	NK cells
GOLGA8Q	NK cells
MGAM	NK cells
FSD1	NK cells
S1PR5	NK cells
KIR2DL3	NK cells
ITGB7	NK cells
CD7	NK cells
GZMH	NK cells
CHST12	NK cells
PPP2R2B	NK cells
TPH1	NK cells
LGALS9B	NK cells
NMUR1	NK cells
PIWIL1	NK cells
PDZD4	NK cells
LRRC43	NK cells
RAB29	NK cells
MYO1F	NK cells
GPR65	NK cells
PRR5L	NK cells
LGALS9C	NK cells
C1orf56	NK cells
PTPN7	NK cells
AKNA	NK cells
MYOM2	NK cells
APBA2	NK cells
CLDND2	NK cells
CAPN12	NK cells
P2RY8	NK cells
TNFSF14	NK cells
CCNJL	NK cells
HCST	NK cells
ZNF571	NK cells
ZNF600	NK cells
APMAP	NK cells
FGFBP2	NK cells
CCL5	NK cells
CCL4	NK cells
MBP	NK cells
RNF125	NK cells
DTHD1	NK cells
AKR1C3	NK cells
CCDC152	NK cells
CHST2	NK cells
ZAP70	NK cells
C1orf21	NK cells
C16orf54	NK cells
CATSPER1	NK cells
XCL1	NK cells
ELOVL6	NK cells
GHRL	NK cells
LIM2	NK cells
RUNX3	NK cells
STK26	NK cells
CXCR2	NK cells
HSH2D	NK cells
CCDC65	NK cells
DIP2A	NK cells
HPGD	NK cells
CDKN2D	NK cells
APOBEC3G	NK cells
CX3CR1	NK cells
PIP4K2A	NK cells
S1PR4	NK cells
KLRG1	NK cells
CDC42SE1	NK cells
SATB1	NK cells
INPP4A	NK cells
STAT4	NK cells
ZNF276	NK cells
SYTL1	NK cells
CCND3	NK cells
RBFOX3	NK cells
PROX2	NK cells
ATP8B4	NK cells
ADAP1	NK cells
PRKCH	NK cells
NCALD	NK cells
TMEM120B	NK cells
RNF166	NK cells
LAIR2	NK cells
TPST2	NK cells
C12orf75	NK cells
AXIN1	NK cells
USP28	NK cells
KLF12	NK cells
RHOF	NK cells
ITGAL	NK cells
TBC1D10C	NK cells
PIK3CD	NK cells
AK5	NK cells
DOK2	NK cells
AREG	NK cells
ARHGAP9	NK cells
SLC35D1	NK cells
NAP1L5	NK cells
LRRC7	NK cells
EOMES	NK cells
AOAH	NK cells
RPS6KA1	NK cells
LAT2	NK cells
NLRC3	NK cells
ARHGAP30	NK cells
INPP5D	NK cells
SPON2	NK cells
DENND2D	NK cells
SLC4A8	NK cells
TFDP2	NK cells
GK5	NK cells
ACSS1	NK cells
PVRIG	NK cells
TKTL1	NK cells
RNF168	NK cells
PLA2G6	NK cells
ABHD15	NK cells
ADRB2	NK cells
ANKRD20A2	NK cells
LYAR	NK cells
GOLGA8N	NK cells
FGD3	NK cells
TRAF3IP3	NK cells
IL27RA	NK cells
UBE2F	NK cells
FCRL3	NK cells
RASSF5	NK cells
SP4	NK cells
RHEBL1	NK cells
RASA3	NK cells
MYO1G	NK cells
ZNF578	NK cells
IL12RB1	NK cells
FAM49B	NK cells
STARD3NL	NK cells
MIB2	NK cells
VAMP2	NK cells
CDIP1	NK cells
DPEP1	PCs
IGLL5	PCs
JSRP1	PCs
MZB1	PCs
TNFRSF17	PCs
DUSP26	PCs
DERL3	PCs
SPAG4	PCs
FCRL5	PCs
NCMAP	PCs
FAM92B	PCs
JCHAIN	PCs
SMPDL3B	PCs
SCNN1B	PCs
BRSK1	PCs
MIXL1	PCs
AANAT	PCs
PRSS16	PCs
LCN8	PCs
GNB3	PCs
AMPD1	PCs
POU2AF1	PCs
C2orf88	PCs
TXNDC5	PCs
IGLL1	PCs
P2RX1	PCs
DNAAF1	PCs
MYL2	PCs
TSHR	PCs
SLC17A9	PCs
FKBP11	PCs
ZNF215	PCs
PDK1	PCs
PKHD1L1	PCs
E2F5	PCs
CD38	PCs
CEP128	PCs
GSTM2	PCs
PNOC	PCs
NUGGC	PCs
MEI1	PCs
GUCY2D	PCs
ZBP1	PCs
RASSF6	PCs
ACOXL	PCs
LRRC24	PCs
CCR2	PCs
KIF19	PCs
CPNE5	PCs
SLC38A5	PCs
KHK	PCs
ST6GALNAC4	PCs
C16orf74	PCs
SLC22A31	PCs
HBD	PCs
EAF2	PCs
TRPV3	PCs
PIM2	PCs
KNTC1	PCs
RAB30	PCs
HIST1H2BF	PCs
HSD17B8	PCs
ARSA	PCs
CD79A	PCs
TAS1R3	PCs
SEC11C	PCs
PGLYRP2	PCs
HSPA1L	PCs
FBXO16	PCs
STARD5	PCs
BEX5	PCs
HIST1H2BJ	PCs
ST6GAL1	PCs
B9D1	PCs
ITM2C	PCs
ESR1	PCs
PLPP5	PCs
SEL1L3	PCs
PRDM15	PCs
DENND5B	PCs
OLAH	PCs
LIME1	PCs
HIST1H2AG	PCs
SYNGR4	PCs
FICD	PCs
SLAMF7	PCs
TP53INP1	PCs
MANEA	PCs
CHAC1	PCs
SLC1A4	PCs
HIST1H2BC	PCs
CCDC144A	PCs
B4GALT7	PCs
TXNDC11	PCs
PRPSAP2	PCs
HLA-DOB	PCs
BFSP2	PCs
PRDX4	PCs
KCNK12	PCs
SCAMP5	PCs
CD27	PCs
GPLD1	PCs
WNT10A	PCs
ADGRG5	PCs
TUBB4A	PCs
BMP6	PCs
LMF1	PCs
PAIP2B	PCs
SEL1L	PCs
TXNDC15	PCs
ERLEC1	PCs
SLIT1	PCs
SRPRB	PCs
HIST2H2AA4	PCs
FCRL2	PCs
BSCL2	PCs
SYVN1	PCs
CRELD2	PCs
GMPPB	PCs
SSR4	PCs
XBP1	PCs
CEACAM21	PCs
SDF2L1	PCs
EXOC3L4	PCs
MRPS31	PCs
PM20D1	PCs
HIST1H2BG	PCs
TOR3A	PCs
COCH	PCs
FKBP2	PCs
HIST4H4	PCs
EIF2AK3	PCs
HIST1H2BD	PCs
LAX1	PCs
IFNAR2	PCs
TBCEL	PCs
TGFBR3L	PCs
HIST1H2AE	PCs
HSH2D	PCs
PIP5K1B	PCs
SMIM6	PCs
C11orf24	PCs
TM9SF1	PCs
GAB1	PCs
KCNA3	PCs
TXLNB	PCs
SSR3	PCs
HIST1H4D	PCs
APOM	PCs
HIST1H2BK	PCs
HIST1H1C	PCs
KLF13	PCs
CHDH	PCs
SPCS3	PCs
MCEE	PCs
HIST1H2AH	PCs
TMEM19	PCs
ZNF749	PCs
ATAD3C	PCs
ATP2A3	PCs
NUCB2	PCs
LMAN1	PCs
RHBDD1	PCs
SLC47A1	PCs
IFNLR1	PCs
ASB15	PCs
VSIG8	PCs
ESR2	PCs
CD79B	PCs
ISG20	PCs
HSPA13	PCs
PIK3CG	PCs
NME1-NME2	PCs
ETV2	PCs
C11orf80	PCs
HYI	PCs
NEB	PCs
SEC24A	PCs
HIST1H4H	PCs
TMEM182	PCs
UBE2J1	PCs
HERPUD1	PCs
A1BG	PCs
MANF	PCs
DENND6B	PCs
HIST1H2AC	PCs
STT3A	PCs
CASP10	PCs
RWDD2A	PCs
GNG7	PCs
PAOX	PCs
ANGPTL6	PCs
SPCS2	PCs
PTPRZ1	PCs
TAPBPL	PCs
FNDC3A	PCs
PREB	PCs
CREB3L2	PCs
SLC2A5	PCs
SIL1	PCs
NDUFA4L2	PVL
HEYL	PVL
LGI4	PVL
RASL12	PVL
CDH6	PVL
REM1	PVL
NOTCH3	PVL
KLHL23	PVL
PDE1A	PVL
"SPET4"	PVL
HEY2	PVL
EGFLAM	PVL
FOXS1	PVL
SSTR2	PVL
RGL3	PVL
AVPR1A	PVL
COX4I2	PVL
TBX2	PVL
RERG	PVL
ANGPT1	PVL
DAAM2	PVL
SLC38A11	PVL
FRMD3	PVL
RGS5	PVL
PLCE1	PVL
MAP3K7CL	PVL
PPP1R14A	PVL
LIN7A	PVL
PDE5A	PVL
GJC1	PVL
SLC7A2	PVL
TRPC6	PVL
NFASC	PVL
FOXL1	PVL
CACNA1H	PVL
EGFL6	PVL
FOXC2	PVL
ENPEP	PVL
FAM13C	PVL
HIGD1B	PVL
FAM162B	PVL
PRR16	PVL
NGF	PVL
MOCS1	PVL
PDGFA	PVL
MRVI1	PVL
PTGIR	PVL
ARHGEF17	PVL
PDE3A	PVL
MARK1	PVL
ATP1B2	PVL
GPRC5C	PVL
CACNB2	PVL
LINGO1	PVL
ISYNA1	PVL
TPPP3	PVL
EBF2	PVL
ARHGAP42	PVL
ITGA7	PVL
RNF152	PVL
SOX5	PVL
OLFML2A	PVL
CSPG4	PVL
EDNRA	PVL
SYNPO2	PVL
EPS8	PVL
PLN	PVL
ACAN	PVL
NMNAT2	PVL
KCNJ8	PVL
SATB2	PVL
ADGRA2	PVL
CCDC102B	PVL
RBPMS2	PVL
SERPINI1	PVL
KCNE4	PVL
FBXL13	PVL
CSRNP3	PVL
NEURL1B	PVL
HSPB2	PVL
PARM1	PVL
SOD3	PVL
DACT3	PVL
OR51E1	PVL
ABCC9	PVL
PGF	PVL
PLEKHH3	PVL
PALM2-AKAP2	PVL
GUCY1A2	PVL
ID4	PVL
GCK	PVL
EBF1	PVL
POPDC2	PVL
FRZB	PVL
CCL26	PVL
NDRG2	PVL
C1QTNF1	PVL
EPHA3	PVL
SEMA5B	PVL
NCKAP5	PVL
NTRK2	PVL
CPE	PVL
RYR2	PVL
CHN1	PVL
PLXDC1	PVL
MAP2	PVL
PLAC9	PVL
AJUBA	PVL
FXYD1	PVL
COL18A1	PVL
TNS1	PVL
MYLK	PVL
NRXN2	PVL
PDGFRB	PVL
MAP1B	PVL
SIX1	PVL
EFHD1	PVL
RBM20	PVL
DLX5	PVL
JAG1	PVL
VASN	PVL
HTR1F	PVL
NR2F2	PVL
ADCY3	PVL
NRARP	PVL
ADIRF	PVL
ARHGAP44	PVL
NRIP2	PVL
SLC26A10	PVL
NFATC4	PVL
DPY19L2	PVL
PPP1R12B	PVL
INAFM1	PVL
ANO1	PVL
PPP1R3C	PVL
LYPD1	PVL
PRRT2	PVL
TMEM74B	PVL
DGKB	PVL
LGALSL	PVL
PTK2	PVL
C11orf96	PVL
CLTCL1	PVL
ARHGEF25	PVL
CACNA2D1	PVL
AFAP1L2	PVL
STOX1	PVL
PTP4A3	PVL
LMOD1	PVL
RASD2	PVL
CAP2	PVL
DMD	PVL
RAB6B	PVL
RTN4RL1	PVL
TINAGL1	PVL
DNALI1	PVL
ZP1	PVL
RCAN2	PVL
RAB6C	PVL
EDNRB	PVL
PCDH18	PVL
CDK18	PVL
CSRP2	PVL
KLLN	PVL
PYGM	PVL
KANK2	PVL
FAT1	PVL
RASL11A	PVL
ACTA2	PVL
ADAMTS4	PVL
CAMK2N1	PVL
SLIT3	PVL
ITGA1	PVL
CCR10	PVL
LZTS1	PVL
RARB	PVL
SYNM	PVL
MYOM1	PVL
ATP1A2	PVL
PRKG1	PVL
MYO1B	PVL
GRID1	PVL
GJA4	PVL
SOBP	PVL
ADAMTS10	PVL
NAALAD2	PVL
S1PR3	PVL
LRRC32	PVL
MYL4	PVL
TRNP1	PVL
FOXL2	PVL
EHD2	PVL
COL14A1	PVL
DKK3	PVL
CLEC18A	PVL
ELMOD1	PVL
CDC14B	PVL
S100A3	PVL
CRYAB	PVL
FBLIM1	PVL
CD28	T cells CD4
MAL	T cells CD4
ICOS	T cells CD4
SPOCK2	T cells CD4
CCR4	T cells CD4
CCR6	T cells CD4
TNFRSF25	T cells CD4
CD5	T cells CD4
ITK	T cells CD4
PDE3B	T cells CD4
P2RY10	T cells CD4
PBX4	T cells CD4
TESPA1	T cells CD4
FAAH2	T cells CD4
RAB33A	T cells CD4
CD6	T cells CD4
HPCAL4	T cells CD4
LTB	T cells CD4
SLAMF1	T cells CD4
BATF	T cells CD4
CD3D	T cells CD4
CD3E	T cells CD4
IL7R	T cells CD4
BCL11B	T cells CD4
PASK	T cells CD4
LAT	T cells CD4
CAMK4	T cells CD4
SLAIN1	T cells CD4
CD40LG	T cells CD4
CD2	T cells CD4
TNIK	T cells CD4
RCAN3	T cells CD4
TRABD2A	T cells CD4
CLEC2D	T cells CD4
DGKA	T cells CD4
DUSP16	T cells CD4
PBXIP1	T cells CD4
LEF1	T cells CD4
ZC3H12D	T cells CD4
PIK3IP1	T cells CD4
TBC1D4	T cells CD4
FBLN7	T cells CD4
FAM122C	T cells CD4
FLT3LG	T cells CD4
RASGRP1	T cells CD4
TRAT1	T cells CD4
CD3G	T cells CD4
TNFSF8	T cells CD4
ARNTL	T cells CD4
SAMSN1	T cells CD4
UBASH3A	T cells CD4
LINS1	T cells CD4
SKAP1	T cells CD4
RORA	T cells CD4
PRKCQ	T cells CD4
IPCEF1	T cells CD4
RLN1	T cells CD4
ZNF101	T cells CD4
TCAF2	T cells CD4
LCK	T cells CD4
RHOH	T cells CD4
TTC39C	T cells CD4
SH2D2A	T cells CD4
THEM4	T cells CD4
BIRC3	T cells CD4
CDC14A	T cells CD4
HNRNPLL	T cells CD4
PGAP1	T cells CD4
FAS	T cells CD4
LEPROTL1	T cells CD4
SIT1	T cells CD4
CYTIP	T cells CD4
IKZF1	T cells CD4
SUSD3	T cells CD4
PCED1B	T cells CD4
PLAGL2	T cells CD4
DUSP4	T cells CD4
STAT4	T cells CD4
CEP120	T cells CD4
SH2D1A	T cells CD4
AP3M2	T cells CD4
TNFAIP3	T cells CD4
AGAP2	T cells CD4
MLLT3	T cells CD4
HAUS3	T cells CD4
MFHAS1	T cells CD4
FYN	T cells CD4
ZNF831	T cells CD4
IL32	T cells CD4
GATA3	T cells CD4
JADE2	T cells CD4
DEF6	T cells CD4
PHTF2	T cells CD4
ITM2A	T cells CD4
IL21R	T cells CD4
RAPGEF6	T cells CD4
SC5D	T cells CD4
CDC42SE2	T cells CD4
CHGB	T cells CD4
STAMBPL1	T cells CD4
CDKN1B	T cells CD4
RHBDD2	T cells CD4
CREM	T cells CD4
ABCC1	T cells CD4
IL2RG	T cells CD4
CTLA4	T cells CD4
ZBTB25	T cells CD4
TANK	T cells CD4
FAM184A	T cells CD4
STK4	T cells CD4
SIRPG	T cells CD4
STK17B	T cells CD4
STAT5B	T cells CD4
PARD6A	T cells CD4
GNG2	T cells CD4
ADTRP	T cells CD4
IL18R1	T cells CD4
HELB	T cells CD4
EMB	T cells CD4
JAK3	T cells CD4
ZNF280C	T cells CD4
CD27	T cells CD4
TNFAIP8	T cells CD4
SFXN1	T cells CD4
ACAP1	T cells CD4
"SEPT1"	T cells CD4
"SEPT6"	T cells CD4
PPP1R2	T cells CD4
PAG1	T cells CD4
LPAR2	T cells CD4
TMC8	T cells CD4
ARHGAP15	T cells CD4
IL23A	T cells CD4
CXCR3	T cells CD4
CLYBL	T cells CD4
NR3C1	T cells CD4
FXYD2	T cells CD4
TRAF3	T cells CD4
PTPRC	T cells CD4
TNFRSF1B	T cells CD4
CNOT6L	T cells CD4
SGTB	T cells CD4
TLK1	T cells CD4
FAM129A	T cells CD4
TIGIT	T cells CD4
CHST7	T cells CD4
TBCC	T cells CD4
CCNH	T cells CD4
GPRIN3	T cells CD4
IL12RB1	T cells CD4
NUP210	T cells CD4
ITPRIPL1	T cells CD4
TOX2	T cells CD4
FCHSD1	T cells CD4
RGCC	T cells CD4
MAP4K1	T cells CD4
KLHL28	T cells CD4
TRAF1	T cells CD4
ARID5B	T cells CD4
RGL4	T cells CD4
RSBN1	T cells CD4
SMCHD1	T cells CD4
BCL2	T cells CD4
ELF1	T cells CD4
RTKN2	T cells CD4
PCYOX1L	T cells CD4
CXCR4	T cells CD4
FAM102A	T cells CD4
FAM107B	T cells CD4
TRAF3IP3	T cells CD4
RNF19A	T cells CD4
OCIAD2	T cells CD4
CRADD	T cells CD4
STK17A	T cells CD4
SARAF	T cells CD4
CASP8	T cells CD4
HS3ST3B1	T cells CD4
FAM53B	T cells CD4
PDCD4	T cells CD4
FAM118A	T cells CD4
EML4	T cells CD4
LPIN2	T cells CD4
G3BP2	T cells CD4
SFI1	T cells CD4
MPZL3	T cells CD4
PRDM1	T cells CD4
UXS1	T cells CD4
CD96	T cells CD4
PPP1R3F	T cells CD4
CUL9	T cells CD4
ZFYVE28	T cells CD4
CD52	T cells CD4
TMC6	T cells CD4
CYFIP2	T cells CD4
ARAP2	T cells CD4
RHOF	T cells CD4
VSIG1	T cells CD4
ARID5A	T cells CD4
NELL2	T cells CD4
[truncated: 201 more rows]
